# Supplementary material for: Synthesis of tetrazole fused azepanes and quantum chemical topology study on the mechanism of the intramolecular cycloaddition reaction
Source: Royal Society of Chemistry journal article supplement (doi:10.1039/c7ra10899k), 2017-01-01

## Supporting Information - A

### Synthesis of Tetrazole Fused Azepanes and Quantum Chemical Topology Study on the Mechanism of the Intramolecular Cycloaddition Reaction.

M. S. Pino-Gonzalez,<sup>a\*</sup> A. Romero-Carrasco,<sup>a</sup> S. Calvo-Losada,<sup>b\*</sup> N. Oña-Bernal,<sup>a</sup>  
J. Quirante<sup>b</sup> and F. Sarabia<sup>a</sup>

a. Department of Organic Chemistry. Faculty of Sciences. Campus de Teatinos, s/n.  
University of Málaga. 29071 Málaga (Spain). E-mail: pino@uma.es

b. Department of Physical Chemistry. Faculty of Sciences. Campus de Teatinos, s/n.  
University of Málaga. 29071 Málaga (Spain). E-mail: asenruhup@hotmail.com

#### Contents:

|                                                                                                                                            |    |
|--------------------------------------------------------------------------------------------------------------------------------------------|----|
| 1. Experimental Procedures .....                                                                                                           | 2  |
| 2. Computational data.....                                                                                                                 | 10 |
| 2.1. Transition State in the cyclization process to form tetrazole <b>22</b> from azido nitrile <b>21</b><br>Coordinates and energies..... | 10 |
| 2.2. Cyclization processes to form tetrazoles <b>34</b> and <b>36</b> from azido nitriles <b>33</b> and <b>35</b> .....                    | 13 |
| Table S2: Molecular graphs for selected points on the IRC.....                                                                             | 13 |
| Intrinsic reaction coordinates (IRCs).....                                                                                                 | 15 |
| Coordinate lists.....                                                                                                                      | 16 |
| Energy lists.....                                                                                                                          | 21 |
| 3. Inhibitory activity against glycosidases .....                                                                                          | 24 |

## 1. Experimental Procedures.

### General.

Reactions were monitored by thin layer chromatography (TLC) on E. Merck silica gel plates (0.25 mm) and visualized using UV light (254 nm) and/or heating with phosphomolybdic acid/cerium sulfate(IV)/H<sub>2</sub>SO<sub>4</sub> aq solution. Flash chromatography was performed on E. Merck silica gel (60, particle size 0.040–0.063 mm). NMR spectra were recorded on a Bruker Avance-400 or WP200SY spectrometers at room temperature. Chemical shifts (ppm) are reported relative to the residual solvent peak. Multiplicities are designated as: singlet (s), bs (broad single), doublet (d), triplet (t), multiplet (m), at (apparent triplet) and dt (double triplet) and Coupling constants *J* are expressed in Hertz units. NMR assignments were made using two-dimensional COSY and gHMQC experiments. NMR numbering for bicycled products followed that of the previous compounds. IR spectra of the azido compounds were recorded on a SHIMADZU FTIR-8300 and showed the N<sub>3</sub> typical band at 2324–2352 cm<sup>-1</sup>. High resolution mass spectra (HRMS, FAB) were recorded in the Mass Spectrometry Service of the University of Seville. Optical rotations were measured on a Perkin–Elmer 241 polarimeter.

### 1.1 Synthesis of 6-azido-3,5,7-O-benzyl-6-deoxy-1,2-O-isopropylidene-D-glycero- $\alpha$ -D-glucopyranose (**16**).

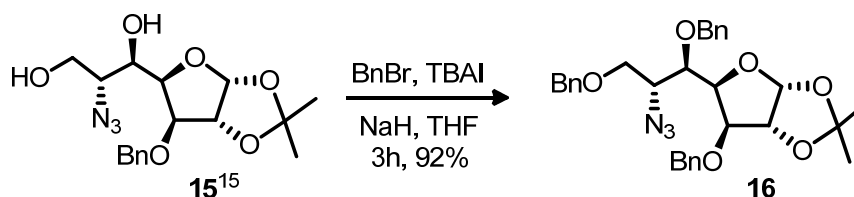

To a stirred solution of azide **15** (750 mg, 2.05 mmol) in dried THF (10 mL) at 0°C, were added NaH 60% mineral oil (0.84 g), TBAI (3 mg) and BnBr (0.52 ml, 4.37 mmol) dropwise. After 3 h, solvent was evaporated and the residue dissolved in CHCl<sub>3</sub>. The solution was washed with 5% aq. NaOH, dried (anh. MgSO<sub>4</sub>) and concentrated under vacuum to give the tribenzylated **16** (1.02 g, 92%) as a colourless syrup. **Rf**: 0.3 (4:1 Hex/AcOEt). **<sup>1</sup>H-RMN (CDCl<sub>3</sub>, 400 MHz,  $\delta$  ppm)**: 7.37-7.16 (m, 15H, *Ph*), 5.89 (d, 1H, *J* = 3.7 Hz, H-1), 4.77-4.47 (m, 6H, CH<sub>2</sub>Ph), 4.43 (d, 1H, *J* = 4.3 Hz, H-2), 4.37 (d, 1H, *J* = 4.3 Hz, H-3), 4.23 (dd, 1H, *J* = 3.0 Hz, 9.3 Hz, H-6), 4.15-3.99 (m, 2H, H-4 and H-5), 3.80-3.74 (m, 2H, H-7a and H-7b), 1.44 and 1.30 (2s, 2x3H, 2CH<sub>3</sub>). **<sup>13</sup>C-RMN (CDCl<sub>3</sub>, 100 MHz,  $\delta$  ppm)**: 137.3-127.2 (3 *Ph*), 111.9 [C(CH<sub>3</sub>)<sub>2</sub>], 105.19 (C-1), 82.00, 81.33 and 78.75 (C-2, C-3 and C-4), 76.64 (C-5), 73.50, 73.30 and 71.90 (CH<sub>2</sub>Ph), 63.10 (C-6), 26.90 and 26.40 (2CH<sub>3</sub>).

ref. 15: N. Oña, A. Romero-Carrasco and M. S. Pino-González, *Tetrahedron: Asymmetry* 2013, **24**, 156.

### 1.2 Synthesis of 6-azido-3,5,7-O-benzyl-6-deoxy-D-glycero- $\alpha$ -D-gluco-heptofuranose (17).

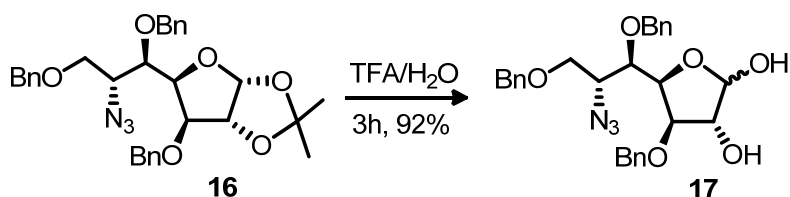

The protected azide **16** (840 mg, 1.53 mmol) was dissolved in 5 mL of TFA/H<sub>2</sub>O (3:2) and stirred for 3h at r.t. Then, the mixture was concentrated and the residue purified by column chromatography to give pure **17** (710 mg, 92%) as a colourless syrup. **Rf**: 0.45 (1:1 Hex/AcOEt). **<sup>1</sup>H-RMN (CDCl<sub>3</sub>, 400 MHz,  $\delta$  ppm)**: 7.61-7.16 (m, 15H, *Ph*), 5.47 (dd, 1H,  $J = 6.5$  Hz,  $J = 4.1$  Hz H-1), 4.82-4.33 (m, 8H, 3CH<sub>2</sub>Ph, H-2, H-3), 4.32-3.60 (m, 3H, H-4, H-5, H6), 2.95-2.85 (m, 2H, H-7a and H-7b). **<sup>13</sup>C-RMN (CDCl<sub>3</sub>, 100 MHz,  $\delta$  ppm)**: 137.3-127.2 (3*Ph*), 79.2, 77.8, 74.1, 73.7 72.2 (C-1, C-2, C-3, C-4, C-5), 72.68, 69.35 and 69.02 (CH<sub>2</sub>Ph), 63.24 (C-6).

### 1.3 Synthesis of (2R,3S,4R,5R,6R)-6-azido-3,5,7-tribenzyloxy-2,4-dihydroxyheptanamide (18).

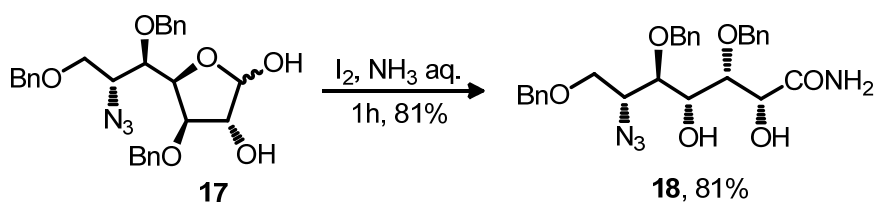

To a solution of lactol **17** (515 mg, 1.01 mmol) in 28% aq NH<sub>3</sub> (10 mL) and THF (1 mL), was added I<sub>2</sub> (281 mg, 1.11 mmol). After stirring for 1h, a saturated solution of Na<sub>2</sub>S<sub>2</sub>O<sub>3</sub> was added and the mixture extracted with CH<sub>2</sub>Cl<sub>2</sub> (2 x 25 mL). The combined organic solvents were dried (MgSO<sub>4</sub>) and concentrated to give amide **18** (425 mg, 81%) as a colourless syrup. A minor product (19 mg, 4%) was isolated and identified as azido nitrile with a carbon less. **Rf**: 0.25 (1:1 Hex/AcOEt).  $[\alpha]_D^{26}$  -30.4 (c 0.8, CH<sub>2</sub>Cl<sub>2</sub>) **<sup>1</sup>H-RMN (CDCl<sub>3</sub>, 400 MHz,  $\delta$  ppm)**:  $\delta$  7.42-7.17 (m, 15H, 3*Ph*), 6.81 (d, 1H,  $J = 3.0$  Hz, NH<sub>2</sub>), 6.27 (d, 1H,  $J = 2.9$  Hz, NH<sub>2</sub>), 4.68 (d, 1H,  $J = 11.2$  Hz, CH<sub>2</sub>Ph), 4.64 (d, 1H,  $J = 11.2$  Hz, CH<sub>2</sub>Ph), 4.56 (s, 2H, CH<sub>2</sub>Ph), 4.41 (d, 1H,  $J = 11.2$  Hz, CH<sub>2</sub>Ph), 4.38 - 4.33 (m, 2H, CH<sub>2</sub>Ph and H-2), 4.28-4.21 (m, 2H), 4.20 - 4.15 (m, 1H, H-6), 3.97 (t, 1H,  $J = 6.6$  Hz, H-4), 3.83 (dd, 1H,  $J = 10.2, 4.1$  Hz, H-7a), 3.77 - 3.71 (m, 2H, H-5 and H-7b), 3.65 (t,  $J = 6.2$  Hz, 1H). **<sup>13</sup>C-RMN (CDCl<sub>3</sub>, 100 MHz,  $\delta$  ppm)**:  $\delta$  154.69 (C-1), 136.75-126.12 (*Ph*), 74.51 (C-3), 74.21 (C-4), 73.24 (CH<sub>2</sub>Ph), 72.81 (C-5), 72.41 (CH<sub>2</sub>Ph), 65.48 (C-2), 44.37 (C-6).

#### 1.4 Synthesis of (2R,3S,4R,5R,6R)-6-azido-3,5,7-tribenzyloxy-2,4-diacetoxyheptanamide (20).

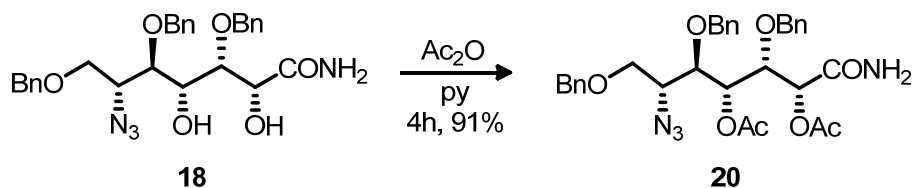

To a stirred solution of amide **18** (329 mg, 0.63 mmol) in  $\text{Ac}_2\text{O}$  (6.3 mL), at  $0^\circ\text{C}$ , was added pyridine (101  $\mu\text{L}$ , 1.26 mmol) dropwise. The reaction mixture was then allowed to warm to room temperature. After 4 h, DCM (30 mL) and a saturated  $\text{NH}_4\text{Cl}$  solution (20 mL) were added. The phases were then separated, and the aqueous phase was extracted with DCM (20 mL). The combined organic phases were dried (anh.  $\text{MgSO}_4$ ), filtered, and the solvent removed under reduced pressure. The resulting colourless oil was purified by column chromatography to give pure **20** (350 mg, 92%).

**Rf:** 0.35 (1:1 Hex/AcOEt)  $[\alpha]_{\text{D}}^{28}$  -18.1 (c 1.5,  $\text{CH}_2\text{Cl}_2$ )  $^1\text{H-RMN}$  ( $\text{CDCl}_3$ , 400 MHz,  $\delta$  ppm):  $\delta$  7.42 – 7.16 (m, 15H, 3Ph), 6.35 and 6.21 (2 bs, 1H,  $\text{NH}_2$ ), 5.46 (dd, 1H,  $J = 6.6, 3.4$  Hz, H-2), 5.36 (d, 1H,  $J = 3.7$  Hz, H-4), 4.68 and 4.60 (2d, 2x1H,  $J = 11.3$  Hz,  $\text{CH}_2\text{Ph}$ ), 4.56–4.52 (m, 3H,  $\text{CH}_2\text{Ph}$ ), 4.44 (d, 1H,  $J = 11.0$  Hz,  $\text{CH}_2\text{Ph}$ ), 4.37 (dd, 1H,  $J = 6.7, 3.7$  Hz, H-3), 3.84–3.73 (m, 3H, H-5, H-6 and H-7a), 3.69–3.60 (m, 1H, H-7b), 2.11 and 2.00 (2s, 2x3H, 2 $\text{CH}_3\text{CO}$ ).  $^{13}\text{C-RMN}$  ( $\text{CDCl}_3$ , 100 MHz,  $\delta$  ppm): 170.19, 169.97 and 169.80 (2 $\text{COCH}_3$  and C-1), 138.08–124.60 (3Ph), 77.02 (C-4), 76.91 (C-2), 75.01, 73.41 and 73.04 ( $\text{CH}_2\text{Ph}$ ), 72.09 (C-3), 71.17 (C-5), 69.81 (C-7), 61.35 (C-6), 20.92 and 20.79 (2 $\text{COCH}_3$ ).

#### 1.5 Synthesis of (2S,3R,4R,5R,6R)-6-azido-3,5,7-tribenzyloxy-2,4-diacetoxyheptanonitrile (21).

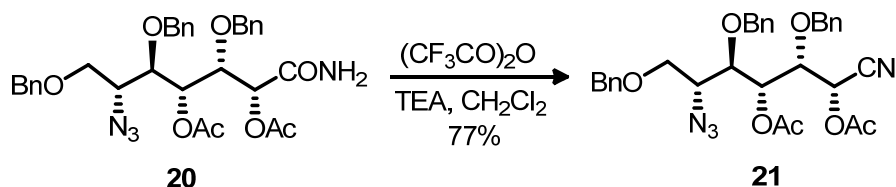

To a stirred solution of **20** (335 mg, 0.55 mmol) in DCM (5.5 mL) were added TEA anh. (0.15 mL, 1.1 mmol) and TFAA (0.08 mL, 0.6 mmol). After 4h, a saturated  $\text{NH}_4\text{Cl}$  solution (10 mL) was added. The phases were then separated and the aqueous phase extracted with DCM (2x20 mL). The organic phase was washed with water (10 mL). The combined organic phases were dried (anh.  $\text{MgSO}_4$ ), filtered, and the solvent removed under reduced pressure. The resulting colourless syrup was purified by column chromatography to give pure **21** (238 mg, 74%). **Rf:** 0.4 (2:1 Hex/AcOEt).  $[\alpha]_{\text{D}}^{28}$  +12.5 (c 1.5,  $\text{CH}_2\text{Cl}_2$ )  $^1\text{H-RMN}$  ( $\text{CDCl}_3$ , 400 MHz,  $\delta$  ppm): 7.43–7.24 (m, 15H, 3Ph), 5.61 (d, 1H,  $J = 6.3$  Hz, H-2), 5.48 (dd, 1H,  $J = 5.1, 3.5$  Hz, H-4), 4.70 – 4.49 (m, 6H, 3 $\text{CH}_2\text{Ph}$ ), 4.12 (dd, 1H,  $J = 6.4, 3.5$  Hz, H-3), 3.95 – 3.86 (m, 2H, H-5 and H-6), 3.83 (dd, 1H,  $J = 10.1, 2.7$  Hz, H-7a), 3.70 (dd, 1H,  $J = 10.1, 6.7$  Hz, H-7b), 2.15 and 2.06 (2s, 2x3H, 2  $\text{CH}_3\text{CO}$ ).  $^{13}\text{C-RMN}$  ( $\text{CDCl}_3$ , 100 MHz,  $\delta$  ppm): 169.91 and 168.68 (2 $\text{COCH}_3$ ), 138.42–126.59 (3Ph), 115.25 (C-1), 77.34 (C-5), 75.51 (C-3), 74.29, 74.00 and 73.47 ( $\text{CH}_2\text{Ph}$ ), 69.98 (C-4), 69.52 (C-7), 61.68 (C-6), 60.23 (C-2), 21.09 and 20.28 ( $\text{COCH}_3$ ).

### 1.6 Cycloaddition to tetrazole azepane **22** and deacetylation. Synthesis of tetrazole azepane **23**

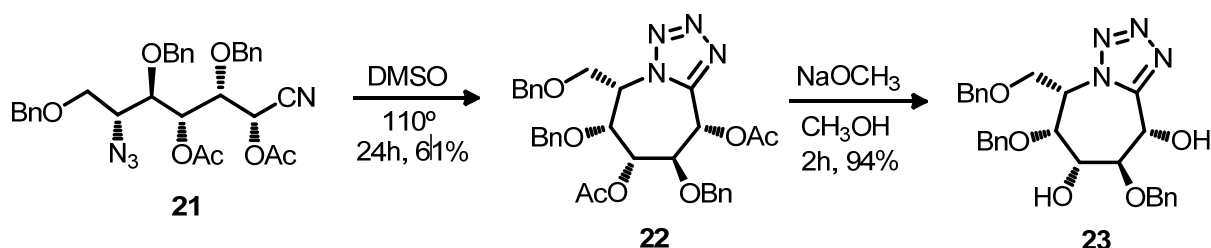

In a sealed tube with Ar atmosphere and stirring was placed **21** (241 mg, 0.41 mmol) in anh. DMSO (8.2 mL). After heating at 140 °C for 24 h, the mixture is allowed to warm to room temperature and  $\text{CH}_2\text{Cl}_2$  (25 mL) was added. The organic extracts are washed with saturated solution of  $\text{NH}_4\text{Cl}$ , dried (anh.  $\text{MgSO}_4$ ) and concentrated to give **22** (146 mg, 61%) as a colourless syrup that was characterized as the tetrazolo azepane **22**. To a solution of **22** (142 mg, 0.24 mmol) in anh. MeOH (2.4 mL) was added with stirring  $\text{CH}_3\text{ONa}$  (26 mg, 0.48 mmol). After 2h the mixture was concentrated and the residue purified by flash chromatography to give **23** (113 mg, 94%) as a colourless syrup. **Rf**: 0.4 (1:3 Hex/AcOEt).  $[\alpha]_D^{27} +3.2$  (c 0.6,  $\text{CH}_2\text{Cl}_2$ ).  **$^1\text{H-RMN}$  ( $\text{CDCl}_3$ , 400 MHz,  $\delta$  ppm)**:  $\delta$  7.40–7.10 (m, 15H, 3Ph), 5.25 (d, 1H,  $J = 8.3$  Hz, H-2), 5.10 (dt, 1H,  $J = 6.6, 4.0$  Hz, H-6), 4.99 (d, 1H,  $J = 11.3$  Hz,  $\text{CH}_2\text{Ph}$ ), 4.68 (d, 1H,  $J = 11.4$  Hz,  $\text{CH}_2\text{Ph}$ ), 4.60 (d, 1H,  $J = 11.8$  Hz,  $\text{CH}_2\text{Ph}$ ), 4.53 (d, 1H,  $J = 11.6$  Hz,  $\text{CH}_2\text{Ph}$ ), 4.44 (d, 1H,  $J = 12.0$  Hz,  $\text{CH}_2\text{Ph}$ ), 4.37 (d, 1H,  $J = 12.0$  Hz,  $\text{CH}_2\text{Ph}$ ), 4.27 (dd, 1H,  $J = 6.8, 1.6$  Hz, H-4), 4.20 (dd, 1H,  $J = 6.6, 1.6$  Hz, H-5), 3.95 (dd, 1H,  $J = 8.3, 6.8$  Hz, H-3), 3.86 (dd, 1H,  $J = 10.4, 4.2$  Hz, H-7a), 3.80 (dd, 1H,  $J = 10.4, 3.8$  Hz, H-7b).  **$^{13}\text{C-RMN}$  ( $\text{CDCl}_3$ , 100 MHz,  $\delta$  ppm)**:  $\delta$  154.95 (C-1), 138.55 – 123.25 (3Ph), 80.03 (C-3), 75.56 (C-5), 74.99, 73.55 and 73.12 ( $\text{CH}_2\text{Ph}$ ), 72.22 (C-4), 67.70 (C-2), 67.54 (C-7), 59.47 (C-6).

### 1.7 Deprotection of benzylated **23** to tetrazolopolyhydroxyazepane **13**

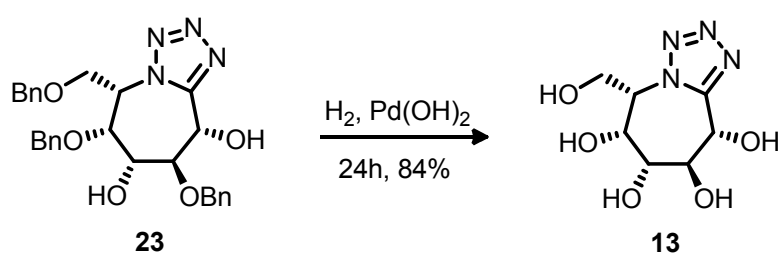

The tetrazolo **23** (108 mg, 0.21 mmol) was dissolved in MeOH (10 mL) and  $\text{Pd(OH)}_2$  (16 mg, 0.11 mmol) was added. The mixture was hydrogenated under a pressure of 45 psi for 48 h and then filtered through Celite®. Solvent was evaporated and water was added to the crude product to be purified through Cartridge, Sep-Pak® C18. Filtrates were concentrated under vacuum giving the tetrazolopolyhydroxyazepane **13** (41 mg, 84%) as a white solid. m.p. = 92–95°C.  $[\alpha]_D^{27} +4.7$  (0.8 c, MeOH). **IR** ( $\nu$ ,  $\text{cm}^{-1}$ ): 3313, 2464, 2399, 1468, 1433, 1262, 1061.  **$^1\text{H-RMN}$  ( $\text{D}_2\text{O}$ , 400 MHz,  $\delta$  ppm)**:  $\delta$  5.03 (ddd, 1H,  $J = 6.5, 4.8$  Hz, H-6), 4.94 (d, 1H,  $J = 9.7$  Hz, H-2), 4.33 (dd, 1H,  $J = 5.3, 2.0$  Hz, H-5), 3.90 – 3.75 (m, 3H, H-7a, H-7b and H-4), 3.81 (dd, 1H,  $J = 9.7, 8.6$  Hz, H-3).  **$^{13}\text{C-RMN}$  ( $\text{CDCl}_3$ , 100 MHz,  $\delta$  ppm)** and **DEPT-135** data:  $\delta$  157.69 (C-1), 74.95 (C-4, CH), 73.68 (C-3, CH), 71.93 (C-5, CH),

69.19 (C-2, CH) , 66.93 (C-6, CH), 61.82 (C-7, CH<sub>2</sub>). **FAB-HRMS (NBA):** *m/z* 255.0697, [M+Na]<sup>+</sup> calcd. for C<sub>7</sub>H<sub>12</sub>N<sub>4</sub>O<sub>5</sub>Na 255.0700.

### 1.8 Synthesis of 6-azido-6-deoxy-3-O-benzyl-1,2-O-isopropylidene- $\alpha$ -D-glucofuranose (**25**).

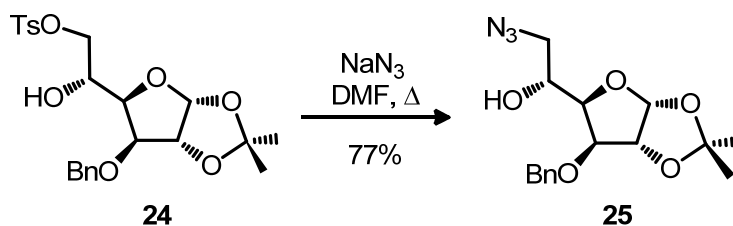

To a stirred solution of **24** (6.66 g, 14.33 mmol) in DMF (140 mL) was added NaN<sub>3</sub> (1.024 g, 15.76 mmol) and the mixture refluxed for 2h. The reaction is left to reach r.t. and a saturated NH<sub>4</sub>Cl solution (100 mL) was added. The phases were then separated and the aqueous phase extracted with DCM (2x150 mL). The combined organic extracts were washed with water (100 mL), dried (anh. MgSO<sub>4</sub>), filtered, and the solvent removed under reduced pressure. The resulting syrup was purified by column chromatography to give pure **25** (3.78 g, 77%) as a colourless syrup. **Rf:** 0.75 (1:1 Hex/AcOEt) **<sup>1</sup>H-RMN (CDCl<sub>3</sub>, 400 MHz,  $\delta$  ppm):** 7.41–7.27 (m, 5H, *Ph*), 5.92 (d, 1H, *J* = 3.8 Hz, H-1), 4.74 (d, 1H, *J* = 11.8 Hz, CH<sub>2</sub>Ph), 4.63 (d, 1H, *J* = 3.8 Hz, H-1), 4.53 (d, 1H, *J* = 11.8 Hz, CH<sub>2</sub>Ph), 4.15 – 4.04 (m, 4H, H-2, H-3, H-4, H-5), 3.57–3.39 (m, 1H, H-6), 2.36 – 2.28 (m, 1H, OH), 1.49 and 1.33 (s, 6H, CMe<sub>2</sub>). **<sup>13</sup>C-RMN (CDCl<sub>3</sub>, 100 MHz,  $\delta$  ppm):** 138.41–122.97 (*Ph*), 112.00 [C(CH<sub>3</sub>)<sub>2</sub>], 105.24 (C-1), 82.11, 81.61 and 79.97 (C-2, C-3 and C-4), 72.11(CH<sub>2</sub>Ph), 68.47 (C-5), 54.52 (C-6), 26.83 and 26.31 (CMe<sub>2</sub>).

### 1.9 Synthesis of 6-azido-6-deoxy-3,5-di-O-benzyl-1,2-O-isopropylidene- $\alpha$ -D-glucofuranose (**26**).

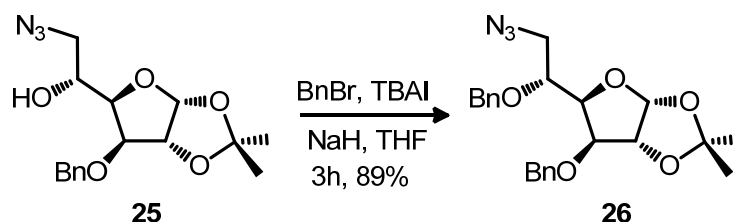

To a stirred solution of azide **5** (4.41 g, 13.15 mmol) in THF (120 mL) at 0°C, were added NaH 60% mineral oil, (525 mg), TBAI (100 mg, 0.27 mmol) and BnBr (2.05 ml, 17.23 mmol) dropwise. After 3 h, solvent is evaporated and the residue dissolved in CH<sub>2</sub>Cl<sub>2</sub> (100 mL). The mixture is washed with aq. 5% NaOH (2 x 50 mL), dried (MgSO<sub>4</sub>) and concentrated under vacuum to give the dibenzylated **29** (4.97 g, 89%) as a colourless syrup. **<sup>1</sup>H-RMN (CDCl<sub>3</sub>, 400 MHz,  $\delta$  ppm):** 7.46–7.11 (m, 10H, *2Ph*), 5.91 (d, 1H, *J* = 3.9 Hz, H-1), 4.74 – 4.49 (m, 2H, 2CH<sub>2</sub>Ph and H-2), 4.30 (dd, 1H, *J* = 9.0, 3.1 Hz, H-4), 4.13 (d, 1H, *J* = 3.1 Hz, H-3), 4.03 (ddd, 1H, *J* = 9.0, 5.1, 2.6 Hz, H-5), 3.68 (dd, 1H, *J* = 13.2, 2.6 Hz, H-6a), 3.46 (dd, 1H, *J* = 13.2, 5.1 Hz, H-6b), 1.52 and 1.33 (s, 2x3H, 2CH<sub>3</sub>). **<sup>13</sup>C-RMN (CDCl<sub>3</sub>, 100 MHz,  $\delta$  ppm):** 137.93–127.27 (*2Ph*), 112.10 [C(CH<sub>3</sub>)<sub>2</sub>], 105.11 (C-1), 81.78, 81.70 and 79.33 (C-2, C-3 and C-4), 75.39, 72.76 and 71.96 (2CH<sub>2</sub>Ph and C-5), 52.19 (C-6), 26.93 and 26.46 (2CH<sub>3</sub>).

### 1.10 Synthesis of (2R,3S,4R,5R)-6-azido-3,5-dibenzyloxy-2,4-dihydroxyhexanamide (**27**).

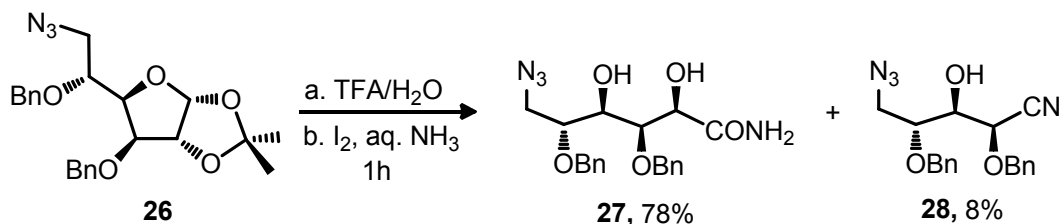

A solution of azide **26** (510 mg, 1.20 mmol) in TFA/H<sub>2</sub>O (18 mL, 3:2) was stirred at room temperature for 3 h. Evaporation of the solvent gave 435 mg of crude product, which is used in the next step without purification. The crude product was dissolved in a mixture of 28% aq. NH<sub>3</sub> (11.2 mL) and THF (1.1 mL), and then I<sub>2</sub> (312 mg, 1.23 mmol) was added. After stirring for 1 h the reaction mixture was diluted with aq. saturated Na<sub>2</sub>S<sub>2</sub>O<sub>3</sub> (15 mL) and extracted with CH<sub>2</sub>Cl<sub>2</sub> (2 x 25 mL). The extracts were dried (MgSO<sub>4</sub>), concentrated and purified on column chromatography to give **27** (374 mg, 78%, two steps) as a colourless syrup. A minor less polar compound (8%) was isolated and identified as azido nitrile **28** (See NMR assignment in spectra in Supporting-B document). Compound **27** had  $[\alpha]_{\text{D}}^{28}$ : -34.5 (c 1.5, CH<sub>2</sub>Cl<sub>2</sub>) **Rf**: 0.2 (1:3 Hexanes/AcOEt). **<sup>1</sup>H-RMN (CDCl<sub>3</sub>, 400 MHz,  $\delta$  ppm)**: 7.39–7.16 (m, 10H, 2Ph), 6.82 and 6.21 (2s, 2x1H, CONH<sub>2</sub>), 4.62 (2d, 2H, 2 H, CH<sub>2</sub>Ph), 4.38 (d, 1H, *J* = 11.2 Hz, CH<sub>2</sub>Ph), 4.34 (d, 1H, *J* = 11.3 Hz, CH<sub>2</sub>Ph), 4.22 (bs, 2H, H-2 and H-3), 3.95 (d, 1H, *J* = 7.9 Hz, H-4), 3.66 (dd, 1H, *J* = 13.0, 2.9 Hz, H-6a), 3.61 (m, 1H, H- 5), 3.44 (dd, 1H, *J* = 13.0, 3.7 Hz, H-6b). **<sup>13</sup>C-RMN (CDCl<sub>3</sub>, 100 MHz,  $\delta$  ppm)** and **DEPT-135** data: 175.50 (C-1), 137.41, 137.15 and 128.50–128.10 (2Ph), 77.91 (C-5, CH), 77.06 (C-3, CH), 74.07 (CH<sub>2</sub>Ph), 72.54 (C-2, CH), 71.85 (CH<sub>2</sub>-Ph), 71.76 (C-4, CH), 49.07 (C-6, CH<sub>2</sub>).

### 1.11 Synthesis of (2R,3S,4R,5R)-6-azido-3,5-dibenzyloxy-2,4-diacetoxyhexanamide (**29**).

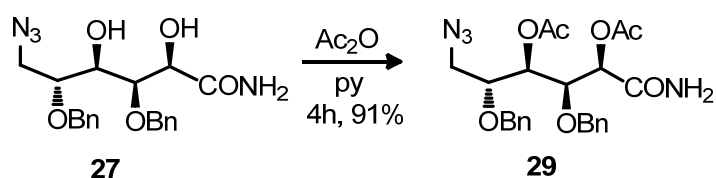

To a stirred solution of **27** (377 mg, 0.95 mmol) in Ac<sub>2</sub>O (9.4 mL), cooled up to 0°C, was added py (159  $\mu$ L, 1.97 mmol) dropwise. The reaction mixture was then left to reach room temperature. After 4 h, DCM (40 mL) and saturated aq. NH<sub>4</sub>Cl solution (30 mL) were added. The phases were then separated, and the aqueous phase was extracted with DCM (30 mL). The combined organic phases were dried (anh. MgSO<sub>4</sub>), filtered, and the solvent removed under reduced pressure. The resulting colourless oil was purified by column chromatography to give pure **29** (416 mg, 91%). **Rf**: 0.25 (1:1 Hexanes/AcOEt).  $[\alpha]_{\text{D}}^{27}$ : -11.8 (c 1.6, CH<sub>2</sub>Cl<sub>2</sub>). **<sup>1</sup>H-RMN (CDCl<sub>3</sub>, 400 MHz,  $\delta$  ppm)**:  $\delta$  7.40–7.20 (m, 10H, 2 Ph), 6.35 and 5.95 (NH<sub>2</sub>), 5.40 (t, 1H, *J* = 5.5 Hz, H-4), 5.28 (d, 1H, *J* = 4.2 Hz, H-2), 4.69 (d, 1H, *J* = 11.3 Hz, CH<sub>2</sub>Ph), 4.59 – 4.48 (m, 3H, CH<sub>2</sub>Ph), 4.13 (dd, 1H, *J* = 5.7, 4.2 Hz, H-3), 3.82 (q, 1H, *J* = 4.9 Hz, H-5), 3.46 – 3.33 (m, 2H, H-6a and H-6b), 2.13 and 2.04 (2s, 2x3H, CH<sub>3</sub>). **<sup>13</sup>C-RMN (CDCl<sub>3</sub>, 100 MHz,  $\delta$  ppm)**:  $\delta$  170.27, 169.77 and 169.72 (2 x COCH<sub>3</sub> and C-1), 140.42 – 121.18 (2Ph), 76.87 and 76.81 (C-3 and C-5), 75.04 and 72.20 (CH<sub>2</sub>Ph), 71.58 (C-2), 70.73 (C-4), 50.63 (C-6), 20.86 and 20.77 (COCH<sub>3</sub>).

1.12 Synthesis of nitrile **30**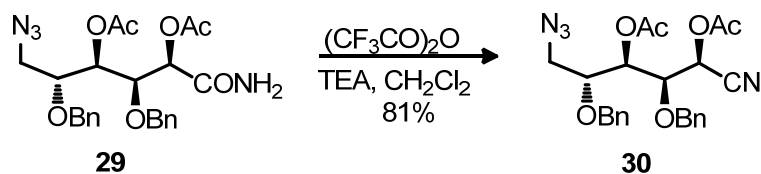

To a solution of **29** (407 mg, 0.84 moles) in DCM (8.4 mL), anh. TEA (0.23 mL, 1.68 mmol) and TFAA (0.13 mL, 0.92 mmol) were added with stirring. After 4h, a saturated  $\text{NH}_4\text{Cl}$  solution (15 mL) was added. The phases were then separated and the aqueous phase extracted with DCM (2x25 mL). The organic phase was washed with water (10 mL). The combined organic phases were dried (anh.  $\text{MgSO}_4$ ), filtered, and the solvent removed under reduced pressure. The resulting colourless syrup was purified by column chromatography to give pure **30** (317 mg, 81%). **Rf**: 0.35 (2:1 Hexanes/AcOEt).  $[\alpha]_{\text{D}}^{27}$ : +29.3 (c 1.3,  $\text{CH}_2\text{Cl}_2$ ).  **$^1\text{H-RMN}$  ( $\text{CDCl}_3$ , 400 MHz,  $\delta$  ppm)**:  $\delta$  7.41 – 7.28 (m, 10H, *Ph*), 5.49 (d, 1H,  $J = 6.3$  Hz, H-2), 5.38 (dd, 1H,  $J = 7.5, 2.5$  Hz, H-4), 4.69 (d, 1H,  $J = 11.3$  Hz,  $\text{CH}_2\text{Ph}$ ), 4.62 and 4.57 (2d, 2x1H,  $J = 11.7$  Hz,  $\text{CH}_2\text{Ph}$ ), 4.42 (d, 1H,  $J = 11.3$  Hz,  $\text{CH}_2\text{Ph}$ ), 4.07 (dd, 1H,  $J = 6.3, 2.5$  Hz, H-3), 3.87 (ddd, 1H,  $J = 7.5, 5.0, 3.5$  Hz, H-5), 3.59 (dd, 1H,  $J = 13.4, 3.5$  Hz, H-6a), 3.31 (dd, 1H,  $J = 13.4, 5.0$  Hz, H-6b), 2.17 and 2.10 (2s, 2x3H,  $\text{CH}_3$ ).  **$^{13}\text{C-RMN}$  ( $\text{CDCl}_3$ , 100 MHz,  $\delta$  ppm)**:  $\delta$  169.9 and 168.6 (2COCH<sub>3</sub>), 137.0, 136.5 and 129-127 (2Ph), 115.08 (C-1), 76.15 (C-5), 74.75 (C-3), 74.27 and 72.56 ( $\text{CH}_2\text{Ph}$ ), 69.52 (C-4), 59.47 (C-2), 50.50 (C-6), 21.01 and 20.28 ( $\text{CH}_3$ ).

1.13 Cycloaddition to tetrazole **31**.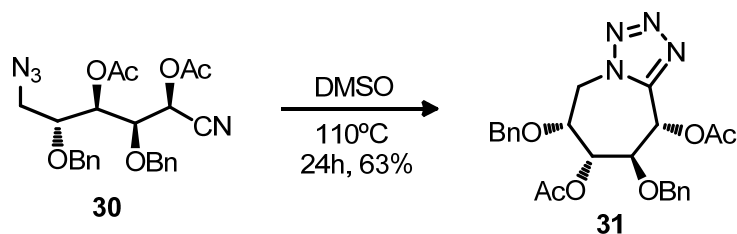

In a sealed tube with Ar atmosphere and stirring was placed **30** (308 mg, 0.66 mmol) in anh. DMSO (12.8 mL). After heating at 140 °C for 24 h, the mixture was allowed to warm to room temperature and  $\text{CH}_2\text{Cl}_2$  (30 mL) was added. The organic extracts are washed with saturated solution of  $\text{NH}_4\text{Cl}$ , dried (anh.  $\text{MgSO}_4$ ) and concentrated to give **31** (193 mg, 63 %) as a colourless syrup. **Rf**: 0.65 (1:1 Hexanes/AcOEt).  $[\alpha]_{\text{D}}^{27}$ : +10.9 (c 2.8,  $\text{CH}_2\text{Cl}_2$ ).  **$^1\text{H-RMN}$  ( $\text{CDCl}_3$ , 400 MHz,  $\delta$  ppm)**: 7.40 – 7.20 (m, 10H, 2*Ph*), 6.32 (d, 1H,  $J = 6.9$  Hz, H-2), 5.47 (dd, 1H,  $J = 6.5, 1.9$  Hz, H-4), 4.90 (dd, 1H,  $J = 14.4, 9.1$  Hz, H-6), 4.72 (d, 1H,  $J = 11.5$  Hz,  $\text{CH}_2\text{Ph}$ ), 4.62 (dd, 1H,  $J = 14.4, 1.9$  Hz, H-6'), 4.61 (d, 1H,  $J = 11.5$  Hz,  $\text{CH}_2\text{Ph}$ ), 4.52 (s, 1H,  $\text{CH}_2\text{Ph}$ ), 4.25 (at, 1H,  $J = 6.7$  Hz, H-3), 3.96 (dt, 1H, H-5), 2.12 and 2.04 (2s, 2x3H, 2CH<sub>3</sub>).  **$^{13}\text{C-RMN}$  ( $\text{CDCl}_3$ , 100 MHz,  $\delta$  ppm)**:  $\delta$  169.52 and 168.90 (COCH<sub>3</sub>), 151.27 (C-1), 136.60, 136.30 and 128.70-127.90 (2*Ph*), 74.63 ( $\text{CH}_2\text{Ph}$ ), 73.14 (C-3), 72.74 (C-4), 71.94 ( $\text{CH}_2\text{Ph}$ ), 71.45 (C-5), 65.26 (C-2), 45.96 (C-6), 20.78 and 20.51 (2CH<sub>3</sub>).



### 1.14 Deacetylation of tetrazole **31**.

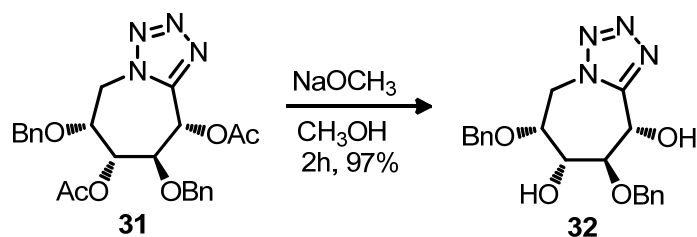

To a stirred solution of tetrazole **31** (180 mg, 0.38 mmol) in anh. MeOH (3.8 mL) was added NaOCH<sub>3</sub> (41 mg, 0.76 mmol). After 2h, the mixture was concentrated and the crude syrup purified by flash chromatography to afford **32** (141 mg, 97%) as a colourless syrup. **Rf**: 0.3 (1:3 Hexanes/AcOEt).  $[\alpha]_D^{28}$ : +6.4 (c 0.7, CH<sub>2</sub>Cl<sub>2</sub>). **<sup>1</sup>H-RMN (CDCl<sub>3</sub>, 400 MHz,  $\delta$  ppm)**: 7.42–6.94 (m, 10H, 2*Ph*), 5.44 (d, 1H,  $J$  = 5.8 Hz, H-2), 4.72 (m, H-6a, H-6b), 4.65 and 4.44 (2d, 2x1H,  $J$  = 11.7 Hz, CH<sub>2</sub>Ph), 4.58 (2d, 2x1H,  $J$  = 12.10 Hz, CH<sub>2</sub>Ph), 4.34 (dd, 1H,  $J$  = 5.8, 1.7 Hz, H-4), 4.17 (t, 1H,  $J$  = 5.8 Hz, H-3), 3.89 (ddd, 1H,  $J$  = 8.8, 3.8, 1.7 Hz, H-5). **<sup>13</sup>C-RMN (CDCl<sub>3</sub>, 100 MHz,  $\delta$  ppm)**:  $\delta$  154.66 (C-1), 136.59 (2C) and 128.68–127.91 (2*Ph*), 74.46 (C-3), 74.15 (C-4), 73.18 (CH<sub>2</sub>Ph), 72.75 (C-5), 72.35 (CH<sub>2</sub>Ph), 65.42 (C-2), 44.31 (C-6).

### 1.15 Deprotection of **32** to tetrazolopolyhydroxyazepane **14**

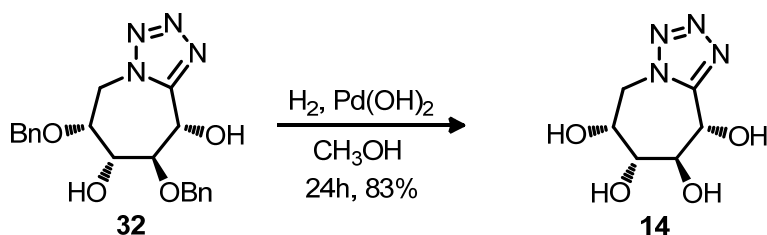

The tetrazolo **32** (129 mg, 0.33 mmol) was dissolved in MeOH (10 mL) and Pd(OH)<sub>2</sub> (25 mg, 0.18 mmol) was added. The mixture was hydrogenated under a pressure of 45 psi for 48 h and then filtered through Celite®. Solvent was evaporated and water was added to the crude product which was purified through Cartridge, Sep-Pak® C18. Filtrates were concentrated under vacuum giving the tetrazolopolyhydroxyazepane **14** (55 mg, 83%) as a white solid.  $[\alpha]_D^{28}$  +1.4 (c 0.5, MeOH). **p.f.** = 83–86 °C. **IR (ν, cm<sup>-1</sup>)**: 3342, 2477, 2327, 1651, 1431, 1257, 1068. **<sup>1</sup>H-RMN (D<sub>2</sub>O, 400 MHz,  $\delta$  ppm)**: 4.71 (d, 1H,  $J$  = 9.1 Hz, H-2), 4.67 (d, 1H,  $J$  = 15.0, 6.0 Hz, H-6a), 4.17 (d, 1H,  $J$  = 15.0 Hz,  $J_{5,6}$  = 0, H-6b), 4.12 (dd, 1H,  $J$  = 6.0, 2.2 Hz, H-5), 3.63 (dd, 1H,  $J$  = 9.1, 2.2 Hz, H-4), 3.42 (t, 1H,  $J$  = 9.1 Hz, H-3). **<sup>13</sup>C-RMN (CDCl<sub>3</sub>, 100 MHz,  $\delta$  ppm) and DEPT-135 data**: 157.84 (C-1), 77.65 (C-4, CH), 72.63 (C-5, CH), 70.29 (C-3, CH), 68.74 (C-2, CH), 51.46 (C-6, CH<sub>2</sub>). **FAB-HRMS (NBA)**:  $m/e$  225.0606,  $[M+Na]^+$  calcd. for C<sub>6</sub>H<sub>10</sub>N<sub>4</sub>O<sub>4</sub>Na 225.0600.

## 2. Computational data.

### 2.1. Transition State (TS) in the cyclization process to form tetrazole 22 from azido nirile 21

Table S1.- Values for the charge density,  $\rho(r)$ , and the Laplacian of charge density,  $L = -\nabla^2\rho(r)$ , computed at the outlined BCP's of **figure 5** (also enclosed in manuscript). A combination of low charge density with a negative and also low value of  $L$  confirms the closed-shell interaction between the atoms connected by each Bond Critical Point (BCP).

| BCP                    | $\alpha$ | $\beta$  | $\gamma$ | $\delta$ | $\epsilon$ | $\zeta$  |
|------------------------|----------|----------|----------|----------|------------|----------|
| $\rho(r)$              | 0,00470  | 0,00750  | 0,00340  | 0,01035  | 0,01064    | 0,01410  |
| $L = -\nabla^2\rho(r)$ | -0,00380 | -0,00613 | -0,00253 | -0,00908 | -0,01037   | -0,01353 |

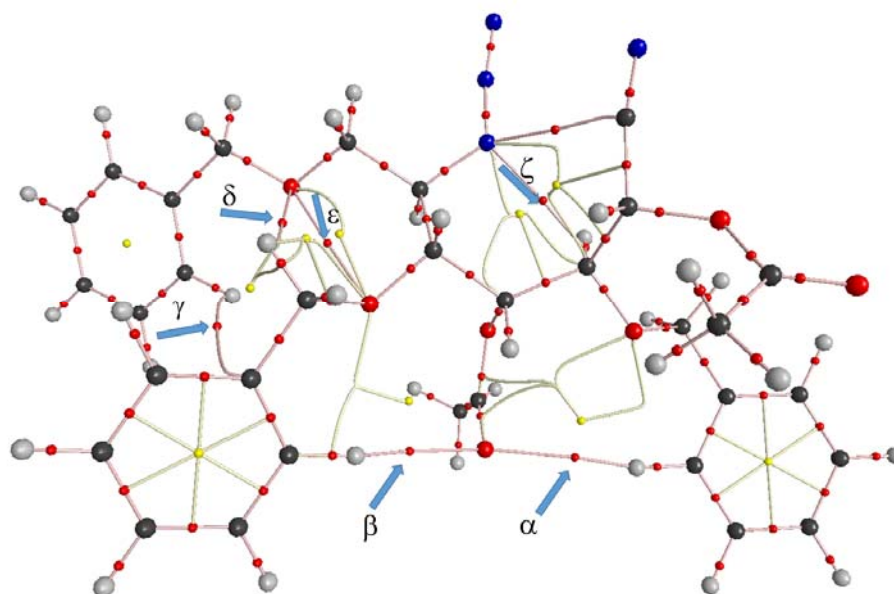

**Figure 5.** The computed LC-wPBE(DMSO)/6-311++G(d,p)//LC-wPBE(DMSO)/6-31G(d) molecular graph. The closed-shell relevant interactions have been indicated with blue arrows.

Coordinates (TS)

|   |          |          |          |
|---|----------|----------|----------|
| 6 | -0.86883 | 1.91843  | -0.41989 |
| 6 | -0.43586 | 0.75002  | 0.47463  |
| 6 | 2.3551   | 1.89559  | 1.00566  |
| 6 | 0.84938  | 0.0615   | 0.01168  |
| 6 | 2.12892  | 0.87737  | -0.14480 |
| 7 | 0.15348  | 2.95194  | -0.24056 |
| 6 | 1.85902  | 3.24408  | 0.62102  |
| 7 | 2.12169  | 4.39778  | 0.53740  |
| 7 | 0.51052  | 5.14649  | -0.52473 |
| 7 | -0.04336 | 4.13405  | -0.60851 |
| 8 | 3.74009  | 2.061    | 1.23571  |
| 8 | 3.17101  | -0.06297 | -0.16515 |
| 8 | 0.59205  | -0.51633 | -1.26641 |
| 8 | -1.40454 | -0.26762 | 0.49560  |
| 1 | -0.88609 | 1.58383  | -1.46241 |
| 1 | -0.2793  | 1.1426   | 1.48860  |
| 1 | 1.84906  | 1.57843  | 1.92148  |
| 1 | 1.0529   | -0.74358 | 0.72242  |
| 1 | 2.09385  | 1.42162  | -1.09534 |

|   |          |          |          |
|---|----------|----------|----------|
| 6 | 4.43241  | 1.22637  | 2.05529  |
| 6 | 4.17729  | 0.17878  | -1.13955 |
| 6 | 0.63768  | -1.85717 | -1.38384 |
| 6 | -2.19814 | -0.34503 | 1.66689  |
| 6 | 3.67323  | 0.32     | 2.97990  |
| 8 | 5.63362  | 1.30101  | 2.01828  |
| 1 | 3.07768  | -0.401   | 2.41766  |
| 1 | 3.01208  | 0.88863  | 3.63896  |
| 6 | 5.15826  | -0.96211 | -1.12493 |
| 6 | 4.7279   | -2.27021 | -0.91686 |
| 6 | 5.63689  | -3.31857 | -0.94463 |
| 6 | -2.85491 | -1.6982  | 1.74223  |
| 6 | -2.166   | -2.84747 | 1.36344  |
| 6 | -2.76674 | -4.09343 | 1.47864  |
| 6 | 0.29287  | -2.27579 | -2.77988 |
| 8 | 0.91925  | -2.60347 | -0.47572 |
| 1 | 0.40816  | -3.35376 | -2.87892 |
| 1 | 0.93774  | -1.76145 | -3.49508 |
| 1 | -0.73955 | -1.99309 | -2.99850 |
| 6 | -2.24548 | 2.48181  | -0.06755 |
| 1 | -2.35663 | 3.46762  | -0.54150 |
| 1 | -2.33294 | 2.62809  | 1.02024  |
| 6 | 6.98305  | -3.07294 | -1.18737 |
| 6 | 7.41667  | -1.77081 | -1.39625 |
| 6 | 6.50805  | -0.72083 | -1.35894 |
| 1 | 4.68865  | 1.12516  | -0.93309 |
| 1 | 3.70316  | 0.2584   | -2.12737 |
| 1 | 3.67695  | -2.46377 | -0.72387 |
| 1 | 5.29164  | -4.33491 | -0.77702 |
| 1 | 7.6927   | -3.89493 | -1.20975 |
| 1 | 8.46785  | -1.56823 | -1.58017 |
| 1 | 6.85435  | 0.29854  | -1.51122 |
| 6 | -4.05848 | -4.206   | 1.97919  |
| 6 | -4.74921 | -3.06325 | 2.35896  |
| 6 | -4.1504  | -1.81593 | 2.23539  |
| 1 | -2.96266 | 0.43914  | 1.66362  |
| 1 | -1.56193 | -0.19532 | 2.55052  |
| 1 | -1.15879 | -2.76157 | 0.96679  |
| 1 | -2.22196 | -4.98355 | 1.17637  |
| 1 | -4.52634 | -5.1822  | 2.06902  |
| 1 | -5.7616  | -3.14004 | 2.74510  |
| 1 | -4.7004  | -0.92271 | 2.52193  |
| 1 | 4.39927  | -0.21833 | 3.58670  |
| 8 | -3.22726 | 1.60879  | -0.55108 |
| 6 | -4.53116 | 2.10478  | -0.36098 |
| 1 | -4.69832 | 2.32391  | 0.70493  |
| 1 | -4.66195 | 3.05056  | -0.90719 |
| 6 | -5.53621 | 1.08773  | -0.83529 |
| 6 | -6.85893 | 1.47316  | -1.04059 |
| 6 | -5.17477 | -0.23754 | -1.04817 |
| 6 | -7.80788 | 0.54658  | -1.44700 |
| 1 | -7.14922 | 2.50951  | -0.88263 |
| 6 | -6.12498 | -1.16517 | -1.45912 |
| 1 | -4.14427 | -0.53762 | -0.88949 |
| 6 | -7.44266 | -0.77801 | -1.65877 |
| 1 | -8.83588 | 0.86065  | -1.60407 |
| 1 | -5.83086 | -2.19822 | -1.62263 |
| 1 | -8.18388 | -1.50405 | -1.98015 |

Energies reported relative to the TS energy of -1983.983652

-----  
Summary of reaction path following  
-----

--

|    | Energy   | RxCoord  |
|----|----------|----------|
| 1  | -0.03249 | -8.77246 |
| 2  | -0.03212 | -8.42189 |
| 3  | -0.03171 | -8.07640 |
| 4  | -0.03124 | -7.72724 |
| 5  | -0.03071 | -7.37647 |
| 6  | -0.03011 | -7.02468 |
| 7  | -0.02944 | -6.67524 |
| 8  | -0.02870 | -6.33175 |
| 9  | -0.02785 | -5.98047 |
| 10 | -0.02692 | -5.63467 |
| 11 | -0.02587 | -5.28335 |
| 12 | -0.02469 | -4.93090 |
| 13 | -0.02339 | -4.57954 |
| 14 | -0.02196 | -4.22726 |
| 15 | -0.02039 | -3.87706 |
| 16 | -0.01867 | -3.52515 |
| 17 | -0.01679 | -3.17297 |
| 18 | -0.01476 | -2.82064 |
| 19 | -0.01259 | -2.46820 |
| 20 | -0.01032 | -2.11570 |
| 21 | -0.00800 | -1.76313 |
| 22 | -0.00571 | -1.41050 |
| 23 | -0.00358 | -1.05782 |
| 24 | -0.00176 | -0.70510 |
| 25 | -0.00049 | -0.35234 |
| 26 | 0.00000  | 0.00000  |
| 27 | -0.00058 | 0.35216  |
| 28 | -0.00249 | 0.70508  |
| 29 | -0.00593 | 1.05797  |
| 30 | -0.01100 | 1.41090  |
| 31 | -0.01767 | 1.76382  |
| 32 | -0.02576 | 2.11674  |
| 33 | -0.03500 | 2.46966  |
| 34 | -0.04501 | 2.82256  |
| 35 | -0.05537 | 3.17544  |
| 36 | -0.06562 | 3.52831  |
| 37 | -0.07520 | 3.88117  |
| 38 | -0.08342 | 4.23393  |
| 39 | -0.08948 | 4.58258  |
| 40 | -0.09290 | 4.88474  |
| 41 | -0.09533 | 5.19745  |
| 42 | -0.09750 | 5.53773  |
| 43 | -0.09939 | 5.88367  |
| 44 | -0.10103 | 6.23123  |
| 45 | -0.10245 | 6.58095  |
| 46 | -0.10367 | 6.93137  |
| 47 | -0.10471 | 7.28243  |
| 48 | -0.10557 | 7.63156  |
| 49 | -0.10626 | 7.97934  |
| 50 | -0.10682 | 8.32567  |
| 51 | -0.10726 | 8.66929  |

-----

--

## 2.2. Cyclization processes to form tetrazoles **34** and **36** from azido nitriles **33** and **35**.

**Table S2** Molecular graphs for selected points on the IRC for the azido nitriles **33** and **35** (Reactant, p1, p30, and p46) computed at LCwPBE(DMSO)/6-311++G(d,p)//LCwPBE(DMSO)/6-31G(d) theoretical level. The molecular graphs are constructed from CPs of the electronic charge density,  $\rho(r)$ , and trajectories of the gradient of  $\rho(r)$ ,  $\nabla\rho(r)$ , red points stand for bond (3,-1) CPs, yellow for ring (3,+1)CPs and purple (not visible) for nuclear (3,-3)CPs.

It can be observed the formation of the N-C bond before the N-N one due to the **pseudo concerted mechanism** in the formation of the tetrazole ring.

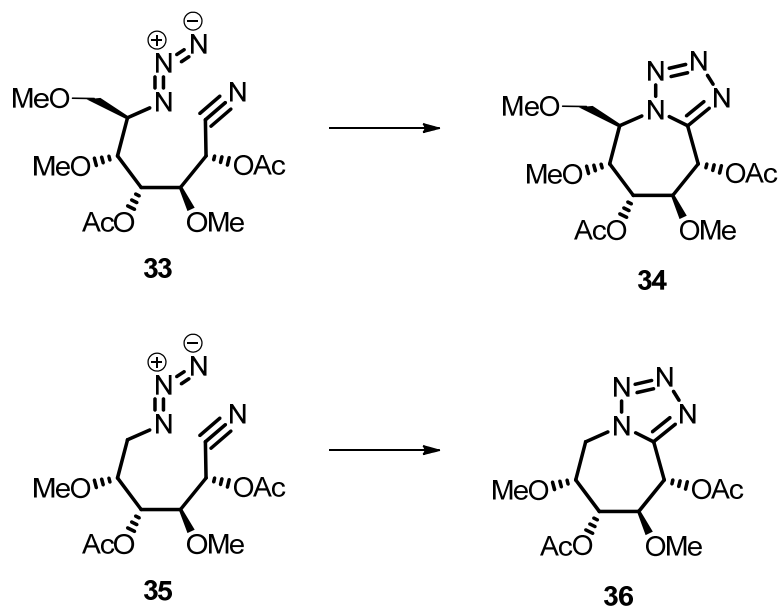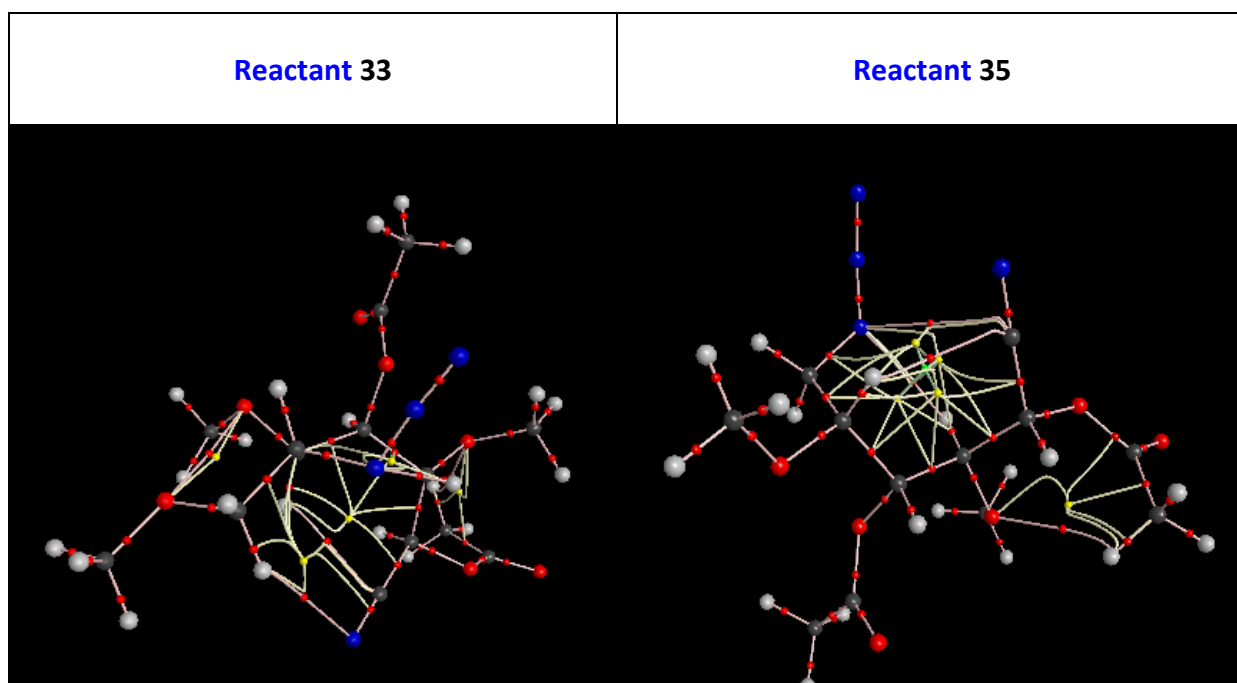

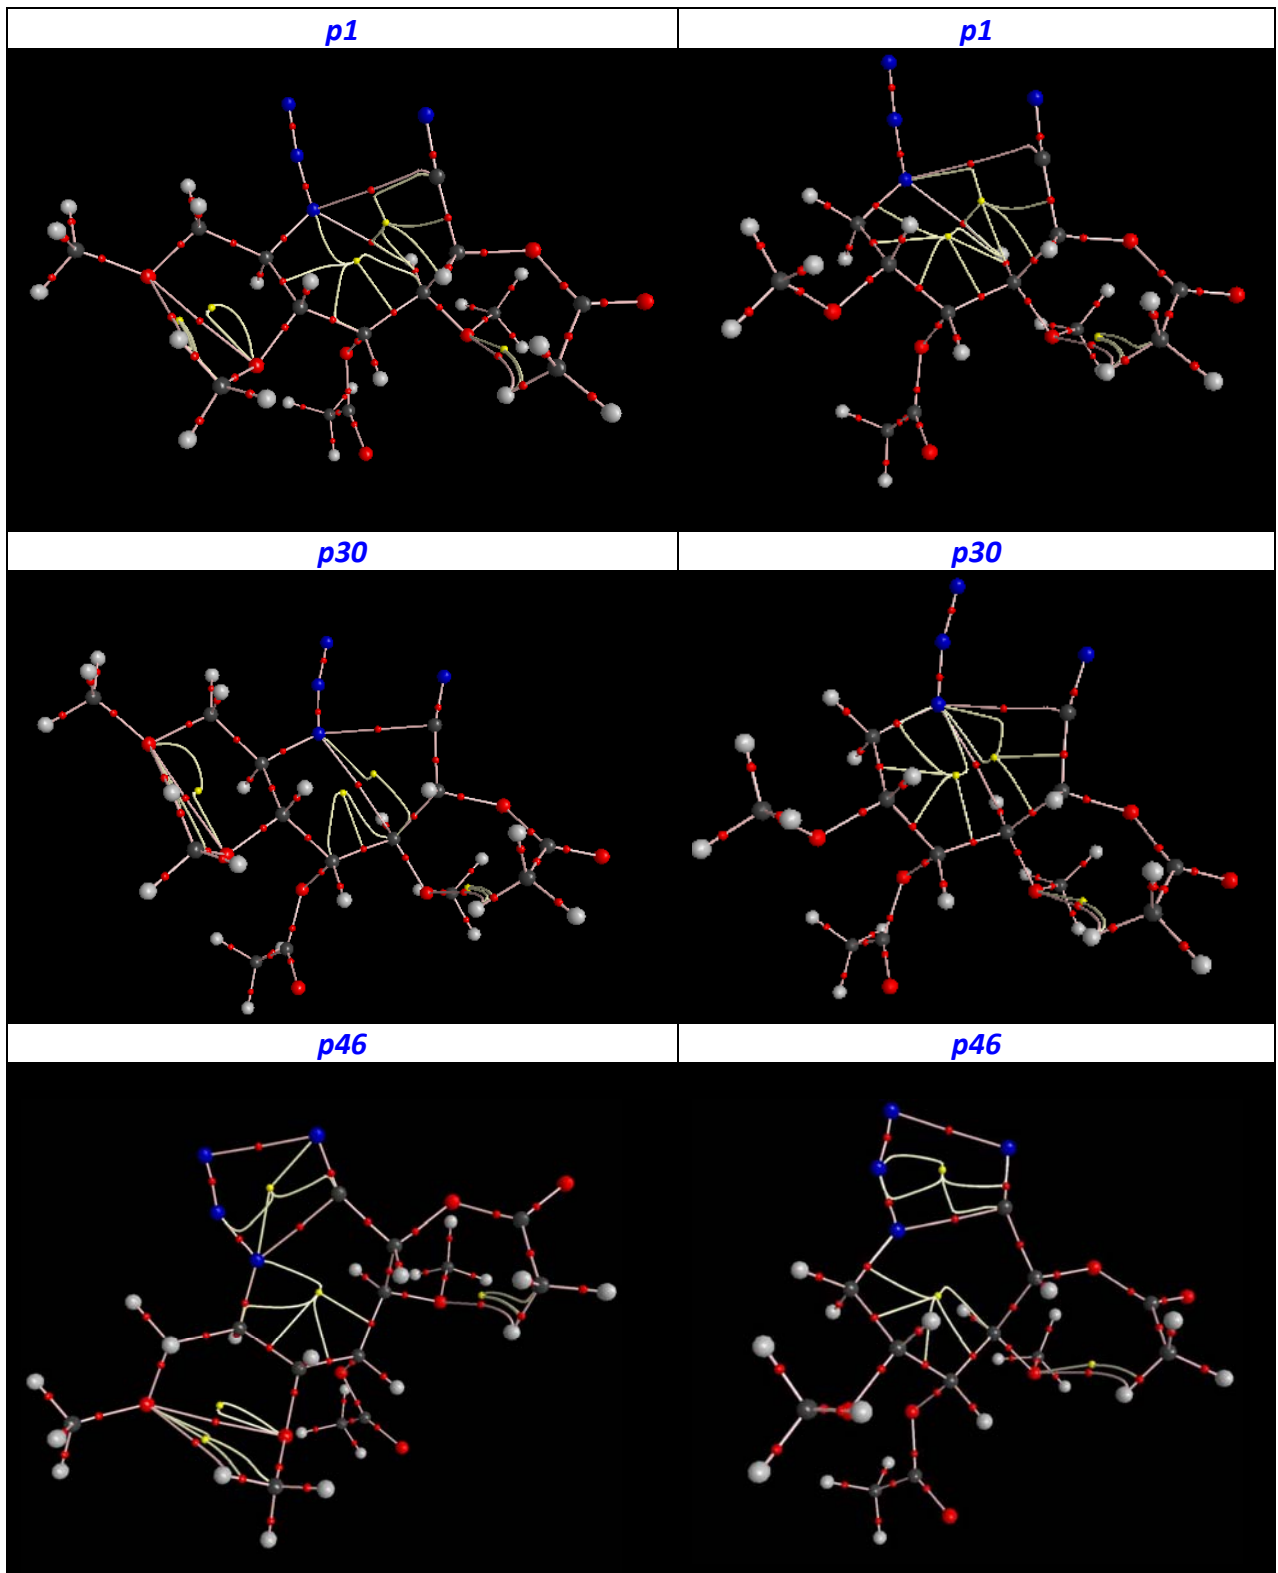

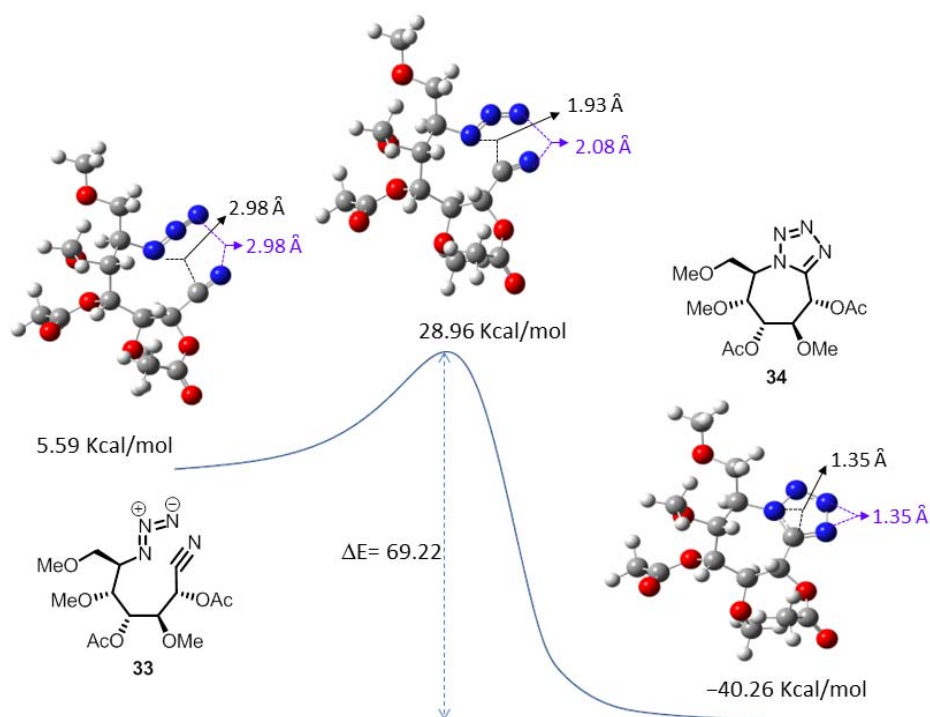

Figure S1. Some points of calculated Intrinsic Reaction Coordinate (IRC) for the cyclization reaction of **33** to **34**. Energies are relative to the preferred conformer obtained after full optimization of the starting compound. Interatomic distances: C-N (black) and N-N (violet).

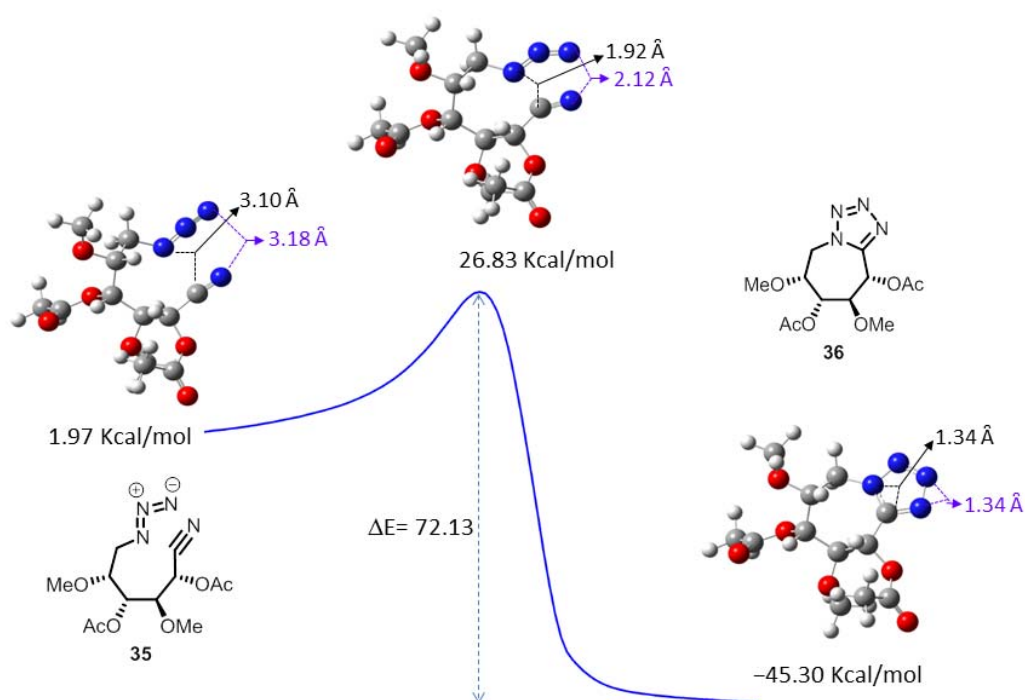

Figure S2. Some points of calculated Intrinsic Reaction Coordinate (IRC) for the cyclization reaction of **35** to **36**. Energies are relative to the preferred conformer obtained after full optimization of the starting compound. Interatomic distances: C-N (black) and N-N (violet).

**Coordinates of the compounds 33 and 35 and Transition States (TS) in the cyclization processes to form tetrazoles 34 and 36 respectively.**

**Ciano nitrile 33**

|   |             |             |             |
|---|-------------|-------------|-------------|
| C | 2.21373600  | -0.04688200 | -0.65949500 |
| C | 1.32592300  | -0.19359700 | 0.59004200  |
| C | -1.62119000 | -1.39883800 | 0.06980700  |
| C | -0.00817500 | 0.55615700  | 0.54107700  |
| C | -1.17201900 | 0.03136800  | -0.30318300 |
| N | 1.43683300  | 0.03453100  | -1.90498100 |
| C | -0.71585000 | -2.43438900 | -0.45421200 |
| N | -0.01438800 | -3.24836800 | -0.87122000 |
| N | 1.34006400  | 2.10233000  | -3.02275400 |
| N | 1.42090000  | 1.13658600  | -2.44522500 |
| O | -2.87479100 | -1.65000400 | -0.53462600 |
| O | -2.26457700 | 0.87395100  | -0.03733200 |
| O | 0.26397600  | 1.87309600  | 0.06160500  |
| O | 2.07877300  | 0.36212500  | 1.64630900  |
| C | -4.04605600 | -1.44141800 | 0.13163100  |
| C | -2.81755900 | 1.49573000  | -1.18581000 |
| C | 0.09736000  | 2.90857900  | 0.91198800  |
| C | 1.96029500  | -0.34104700 | 2.86263900  |
| C | -4.01302800 | -1.24500000 | 1.61849100  |
| O | -5.05163500 | -1.46623700 | -0.52778700 |
| C | 0.44898700  | 4.19939000  | 0.23757100  |
| O | -0.28241800 | 2.78733900  | 2.05045600  |
| C | 3.13848900  | -1.24540300 | -0.83577500 |
| O | 3.82628400  | -1.49498400 | 0.35960000  |
| H | 2.80314700  | 0.86315700  | -0.51250700 |
| H | 1.14744000  | -1.25856200 | 0.78433400  |
| H | -1.66704700 | -1.50911100 | 1.15685300  |
| H | -0.37237600 | 0.64027200  | 1.56939300  |
| H | -0.91741500 | 0.04925900  | -1.36597800 |
| H | -3.22380600 | 0.75405300  | -1.88150000 |
| H | -2.06533300 | 2.10530500  | -1.69762500 |
| H | -3.62464300 | 2.13929400  | -0.83419700 |
| H | 2.34617800  | -1.36159800 | 2.75798000  |
| H | 0.92168700  | -0.38107500 | 3.21557200  |
| H | 2.55774100  | 0.19594600  | 3.60099800  |
| H | -5.04229200 | -1.16185000 | 1.96316200  |
| H | -3.47416000 | -0.33110900 | 1.87458300  |
| H | -3.53762400 | -2.09130200 | 2.12112100  |
| H | 0.30294900  | 5.02703800  | 0.92955100  |
| H | -0.17677100 | 4.33806900  | -0.64671100 |
| H | 1.48945200  | 4.17082200  | -0.09352400 |
| H | 3.83853300  | -1.04061100 | -1.65913800 |
| H | 2.53058200  | -2.11621400 | -1.12457000 |
| C | 4.65493400  | -2.62835400 | 0.25595800  |
| H | 5.41618300  | -2.49780900 | -0.52493700 |
| H | 4.07217700  | -3.53090800 | 0.02745700  |
| H | 5.15156700  | -2.75867900 | 1.21876100  |



**TS to tetrazole 34**

|   |             |             |             |
|---|-------------|-------------|-------------|
| C | -2.16013828 | 0.47554594  | -0.02168650 |
| C | -1.34143428 | -0.77373906 | 0.32295350  |
| C | 1.19930172  | 0.79224594  | 0.98178450  |
| C | -0.04230028 | -0.91789206 | -0.47412050 |
| C | 0.99752872  | 0.19658194  | -0.43889350 |
| N | -1.34057828 | 1.61962294  | 0.38779350  |
| C | 0.38358072  | 2.02369094  | 1.15593750  |
| N | 0.39191772  | 3.16695594  | 1.47288950  |
| N | -1.49545728 | 3.79991294  | 0.88876450  |
| N | -1.83484328 | 2.76660694  | 0.49455550  |
| O | 2.54082072  | 1.20725294  | 1.14833750  |
| O | 2.19036172  | -0.38311206 | -0.89655950 |
| O | -0.39227128 | -1.08671406 | -1.84551950 |
| O | -2.06975028 | -1.93901206 | 0.03743350  |
| H | -2.32851528 | 0.50346294  | -1.10345350 |
| H | -1.09580428 | -0.73110806 | 1.39320950  |
| H | 0.92371872  | 0.07206794  | 1.75677750  |
| H | 0.44024772  | -1.83504406 | -0.12572550 |
| H | 0.68565172  | 0.99958194  | -1.11646650 |
| C | 3.50845072  | 0.34360494  | 1.55113250  |
| C | 2.93691972  | 0.43466394  | -1.78253650 |
| C | -0.17165128 | -2.28905706 | -2.41550650 |
| C | -2.57136628 | -2.63047006 | 1.16253150  |
| C | 3.10629872  | -0.98429806 | 2.12425950  |
| O | 4.64835872  | 0.72229694  | 1.46258250  |
| H | 4.01388172  | -1.50306506 | 2.42833050  |
| H | 2.58423272  | -1.58838306 | 1.38051850  |
| H | 2.45998472  | -0.85958106 | 2.99700050  |
| H | 3.25805772  | 1.36153294  | -1.29793950 |
| H | 2.34833072  | 0.67272794  | -2.67567250 |
| H | 3.81513172  | -0.14239106 | -2.07408150 |
| H | -3.36737828 | -2.06824106 | 1.65949550  |
| H | -1.77267828 | -2.85480306 | 1.87998750  |
| H | -2.98574328 | -3.56929306 | 0.79187250  |
| C | -0.66231828 | -2.29363506 | -3.83138350 |
| O | 0.35007372  | -3.21776406 | -1.84873250 |
| H | -0.41353228 | -3.24262406 | -4.30339850 |
| H | -0.21146228 | -1.46889806 | -4.38698650 |
| H | -1.74521928 | -2.14928906 | -3.84139250 |
| C | -3.51243928 | 0.53175494  | 0.69172050  |
| O | -4.40138128 | -0.36561106 | 0.07148550  |
| H | -3.89391628 | 1.55821394  | 0.62018350  |
| H | -3.36986528 | 0.30500894  | 1.75820750  |
| H | -5.27015628 | -0.23796606 | 0.47486850  |

**Tetrazole 34**

|   |             |             |             |
|---|-------------|-------------|-------------|
| C | -2.03076000 | 0.51935900  | 0.05733700  |
| C | -1.30456400 | -0.81616200 | 0.28437600  |
| C | 1.11119600  | 0.68018300  | 0.91717600  |
| C | -0.03623300 | -1.02624300 | -0.54910200 |
| C | 1.04469200  | 0.04069300  | -0.48278700 |
| N | -1.22164400 | 1.63444600  | 0.58792000  |
| C | 0.05297800  | 1.73951100  | 1.00799400  |
| N | 0.25958500  | 2.97442200  | 1.39700200  |
| N | -0.89735400 | 3.62078700  | 1.20721800  |
| N | -1.78401900 | 2.84027600  | 0.72283300  |
| O | 2.35087100  | 1.32963500  | 1.07850500  |

|   |             |             |             |
|---|-------------|-------------|-------------|
| O | 2.26530800  | -0.56993000 | -0.80344800 |
| O | -0.41334400 | -1.15097200 | -1.91577300 |
| O | -2.14370000 | -1.88223500 | -0.06677800 |
| H | -2.17168500 | 0.68456600  | -1.01439200 |
| H | -1.03726800 | -0.88148300 | 1.34817400  |
| H | 0.96733300  | -0.06920800 | 1.69958100  |
| H | 0.40404600  | -1.97055100 | -0.21998700 |
| H | 0.81750100  | 0.82899700  | -1.21147300 |
| C | 3.43240700  | 0.67647700  | 1.57903400  |
| C | 3.05590100  | 0.15137200  | -1.73555800 |
| C | -0.27615000 | -2.36087600 | -2.49981900 |
| C | -2.67815500 | -2.62705000 | 1.00936700  |
| C | 3.23737300  | -0.64396000 | 2.26723800  |
| O | 4.49852800  | 1.22535700  | 1.46766000  |
| H | 4.20655300  | -0.96413900 | 2.64602700  |
| H | 2.86208400  | -1.39298800 | 1.56771500  |
| H | 2.54000900  | -0.55878200 | 3.10465000  |
| H | 3.33467800  | 1.13601900  | -1.34794000 |
| H | 2.52281200  | 0.26922900  | -2.68542800 |
| H | 3.95775500  | -0.43886900 | -1.90086400 |
| H | -3.44135600 | -2.06245900 | 1.55251600  |
| H | -1.88959300 | -2.94592000 | 1.70112600  |
| H | -3.14307500 | -3.51188600 | 0.57243300  |
| C | -0.78674500 | -2.32372600 | -3.90740900 |
| O | 0.19963300  | -3.32218300 | -1.94747400 |
| H | -0.59980500 | -3.28100500 | -4.39107800 |
| H | -0.29736300 | -1.52086500 | -4.46245000 |
| H | -1.85953700 | -2.11728900 | -3.89936800 |
| C | -3.40032800 | 0.57320100  | 0.74482900  |
| O | -4.31617000 | -0.19127000 | -0.00206100 |
| H | -3.71692900 | 1.61779200  | 0.79153700  |
| H | -3.29973000 | 0.20774100  | 1.77728600  |
| H | -5.20263200 | 0.05941400  | 0.28886800  |

### Ciano nitrile 35

|   |             |             |             |
|---|-------------|-------------|-------------|
| C | -2.35788700 | 0.93578200  | -0.84651200 |
| C | -1.83284700 | 0.37416500  | 0.47815000  |
| C | 1.46152100  | 0.74879800  | 0.61773300  |
| C | -0.69774900 | -0.63706800 | 0.32076900  |
| C | 0.62591800  | -0.16646200 | -0.29727000 |
| N | -1.40947300 | 1.86061300  | -1.47703000 |
| C | 0.88176900  | 2.07793300  | 0.87042300  |
| N | 0.46465000  | 3.12883400  | 1.09544000  |
| N | -1.75071900 | 4.17161000  | -1.19381300 |
| N | -1.63192800 | 3.05351800  | -1.29278700 |
| O | 2.70333100  | 0.98715000  | -0.01874900 |
| O | 1.42809400  | -1.30581800 | -0.48549300 |
| O | -1.18414100 | -1.67070300 | -0.53283400 |
| O | -2.87575500 | -0.33486300 | 1.10992800  |
| H | -3.32184900 | 1.42144600  | -0.66855200 |
| H | -2.52028500 | 0.11187400  | -1.54270000 |
| H | -1.49590100 | 1.19800700  | 1.11919700  |
| H | 1.58989500  | 0.25834900  | 1.58602800  |
| H | -0.49652800 | -1.07389100 | 1.30237500  |
| H | 0.44964300  | 0.34998800  | -1.24557400 |
| C | 3.82789100  | 0.28862000  | 0.30478700  |
| C | 1.74967000  | -1.57698700 | -1.83931000 |
| C | -1.24157800 | -2.92452600 | -0.03928900 |
| C | -3.66192000 | 0.45656100  | 1.97601800  |

|   |             |             |             |
|---|-------------|-------------|-------------|
| C | 3.82736100  | -0.56742600 | 1.53700700  |
| O | 4.77662900  | 0.43115400  | -0.42095900 |
| H | 4.82485500  | -0.98984000 | 1.64484600  |
| H | 3.10137800  | -1.37706400 | 1.44253500  |
| H | 3.59179800  | 0.01845500  | 2.42928000  |
| H | 2.33043800  | -0.75850400 | -2.27826300 |
| H | 0.84368500  | -1.74119400 | -2.43130800 |
| H | 2.35174800  | -2.48631100 | -1.84114700 |
| H | -4.14150600 | 1.29146700  | 1.45089000  |
| H | -3.06088400 | 0.85743600  | 2.80150400  |
| H | -4.43854100 | -0.19276600 | 2.38226500  |
| C | -1.77349000 | -3.87122500 | -1.07190200 |
| O | -0.90560900 | -3.22247900 | 1.08082200  |
| H | -1.86694600 | -4.86715200 | -0.64211100 |
| H | -1.09553900 | -3.90168700 | -1.92802600 |
| H | -2.74550300 | -3.52514600 | -1.42925000 |

**TS to tetrazole 36**

|   |             |             |             |
|---|-------------|-------------|-------------|
| C | -1.91174846 | 1.61009245  | 0.16075393  |
| C | -1.54940146 | 0.40154345  | 1.01655393  |
| C | 1.39014054  | 0.56629645  | 0.21822993  |
| C | -0.84751346 | -0.70490155 | 0.23502493  |
| C | 0.39032354  | -0.32338755 | -0.57329007 |
| N | -0.68018446 | 2.31247645  | -0.17496107 |
| C | 1.21114954  | 2.02027445  | -0.06226107 |
| N | 1.76824854  | 3.04432245  | -0.28317307 |
| N | 0.13364954  | 4.35991945  | -0.59340907 |
| N | -0.65831446 | 3.53730445  | -0.42075007 |
| O | 2.71495354  | 0.27532145  | -0.18358707 |
| O | 0.99882354  | -1.53736655 | -0.92389707 |
| O | -1.77745346 | -1.23180955 | -0.70727207 |
| O | -2.71574446 | -0.17489355 | 1.54535493  |
| H | -2.57168846 | 2.26870845  | 0.72908793  |
| H | -2.43067146 | 1.28198645  | -0.74436007 |
| H | -0.88794046 | 0.73223745  | 1.82977093  |
| H | 1.27788554  | 0.41300545  | 1.29556393  |
| H | -0.57555446 | -1.49767955 | 0.93639893  |
| H | 0.07493354  | 0.21460245  | -1.47533907 |
| C | 3.42129554  | -0.74190655 | 0.37314593  |
| C | 1.47680554  | -1.59106955 | -2.25779407 |
| C | -2.22447546 | -2.49097955 | -0.52402407 |
| C | -3.11389346 | 0.36944545  | 2.78744993  |
| C | 2.91512554  | -1.37317855 | 1.63762393  |
| O | 4.45232654  | -1.05024955 | -0.16796207 |
| H | 3.64200854  | -2.12145655 | 1.94902893  |
| H | 1.95291054  | -1.86036755 | 1.47181393  |
| H | 2.80521754  | -0.63280055 | 2.43423193  |
| H | 2.25383954  | -0.84147055 | -2.43516507 |
| H | 0.65522654  | -1.44358155 | -2.96766707 |
| H | 1.89859354  | -2.58692055 | -2.39773707 |
| H | -3.32719846 | 1.44256245  | 2.71754793  |
| H | -2.34540946 | 0.20918945  | 3.55333393  |
| H | -4.02631546 | -0.15034755 | 3.08169593  |
| C | -3.22842346 | -2.84787255 | -1.57740407 |
| O | -1.85433046 | -3.21296855 | 0.36921293  |
| H | -3.53563546 | -3.88515855 | -1.45529007 |
| H | -2.79815846 | -2.69900055 | -2.56983707 |
| H | -4.09775346 | -2.19218355 | -1.48942507 |

**tetrazole 36**

|   |             |             |             |
|---|-------------|-------------|-------------|
| C | -1.72413700 | 1.58939600  | 0.06088100  |
| C | -1.57452300 | 0.35515300  | 0.94924400  |
| C | 1.27558500  | 0.49876300  | 0.21744200  |
| C | -0.91225500 | -0.81957100 | 0.23289500  |
| C | 0.36355100  | -0.49274200 | -0.53438000 |
| N | -0.46683400 | 2.31925800  | -0.03972000 |
| C | 0.81010500  | 1.91441500  | 0.03062900  |
| N | 1.58037500  | 2.96830600  | -0.10271800 |
| N | 0.75422600  | 4.01203700  | -0.25368900 |
| N | -0.47016600 | 3.64038800  | -0.21477800 |
| O | 2.57534400  | 0.43076500  | -0.32574900 |
| O | 1.04361800  | -1.70139400 | -0.74119800 |
| O | -1.82802700 | -1.33210600 | -0.72905500 |
| O | -2.83754300 | -0.08778700 | 1.36342900  |
| H | -2.44385900 | 2.28152300  | 0.49785600  |
| H | -2.07137600 | 1.31216800  | -0.93716800 |
| H | -0.96109500 | 0.61897600  | 1.82295700  |
| H | 1.29415000  | 0.26695000  | 1.28613500  |
| H | -0.69515200 | -1.59950200 | 0.96568600  |
| H | 0.09052400  | -0.04682100 | -1.49970000 |
| C | 3.51207900  | -0.41572900 | 0.17731300  |
| C | 1.47272900  | -1.91350200 | -2.07705100 |
| C | -2.36792300 | -2.54904200 | -0.50367100 |
| C | -3.29266100 | 0.51373800  | 2.56036000  |
| C | 3.27257200  | -1.06338000 | 1.51075900  |
| O | 4.51171600  | -0.57079000 | -0.47604000 |
| H | 4.15883300  | -1.64527800 | 1.75816800  |
| H | 2.40819800  | -1.72863700 | 1.46820500  |
| H | 3.10803000  | -0.31763300 | 2.29282800  |
| H | 2.18342300  | -1.14483800 | -2.39590900 |
| H | 0.61661900  | -1.92783300 | -2.76046600 |
| H | 1.96328300  | -2.88720000 | -2.09532800 |
| H | -3.38671200 | 1.60170900  | 2.46379800  |
| H | -2.61885900 | 0.28731200  | 3.39507200  |
| H | -4.27698500 | 0.09369900  | 2.76853900  |
| C | -3.35683200 | -2.88935500 | -1.57579800 |
| O | -2.07614300 | -3.24748100 | 0.43569700  |
| H | -3.72312400 | -3.90394400 | -1.42861300 |
| H | -2.89106100 | -2.79700900 | -2.55894400 |
| H | -4.19188900 | -2.18603800 | -1.53524900 |

**Energies of IRC to Tetrazole 34**

Reaction path calculation complete.

Energies reported relative to the TS energy of -1252.057470

-----  
Summary of reaction path following  
-----

|    | Energy   | RxCoord   |
|----|----------|-----------|
| 1  | -0.11052 | -14.70165 |
| 2  | -0.11047 | -14.35121 |
| 3  | -0.11041 | -14.00076 |
| 4  | -0.11035 | -13.65031 |
| 5  | -0.11027 | -13.29984 |
| 6  | -0.11019 | -12.94937 |
| 7  | -0.11009 | -12.59890 |
| 8  | -0.10998 | -12.24844 |
| 9  | -0.10986 | -11.89798 |
| 10 | -0.10973 | -11.54752 |
| 11 | -0.10959 | -11.19706 |
| 12 | -0.10943 | -10.84662 |
| 13 | -0.10926 | -10.49619 |
| 14 | -0.10907 | -10.14580 |
| 15 | -0.10887 | -9.79547  |
| 16 | -0.10864 | -9.44525  |
| 17 | -0.10839 | -9.09523  |
| 18 | -0.10810 | -8.74562  |
| 19 | -0.10776 | -8.39644  |
| 20 | -0.10732 | -8.04725  |
| 21 | -0.10675 | -7.69763  |
| 22 | -0.10602 | -7.34764  |
| 23 | -0.10510 | -6.99743  |
| 24 | -0.10397 | -6.64715  |
| 25 | -0.10261 | -6.29688  |
| 26 | -0.10099 | -5.94671  |
| 27 | -0.09908 | -5.59667  |
| 28 | -0.09682 | -5.24696  |
| 29 | -0.09403 | -4.90053  |
| 30 | -0.08986 | -4.55520  |
| 31 | -0.08335 | -4.20549  |
| 32 | -0.07488 | -3.85514  |
| 33 | -0.06519 | -3.50471  |
| 34 | -0.05493 | -3.15428  |
| 35 | -0.04461 | -2.80384  |
| 36 | -0.03467 | -2.45337  |
| 37 | -0.02552 | -2.10290  |
| 38 | -0.01751 | -1.75241  |
| 39 | -0.01091 | -1.40191  |
| 40 | -0.00588 | -1.05142  |
| 41 | -0.00247 | -0.70094  |
| 42 | -0.00057 | -0.35050  |
| 43 | 0.00000  | 0.00000   |
| 44 | -0.00049 | 0.34984   |
| 45 | -0.00177 | 0.70026   |
| 46 | -0.00359 | 1.05071   |
| 47 | -0.00573 | 1.40116   |
| 48 | -0.00803 | 1.75161   |
| 49 | -0.01036 | 2.10205   |
| 50 | -0.01265 | 2.45248   |
| 51 | -0.01483 | 2.80290   |
| 52 | -0.01688 | 3.15332   |
| 53 | -0.01879 | 3.50375   |
| 54 | -0.02055 | 3.85418   |
| 55 | -0.02215 | 4.20461   |
| 56 | -0.02360 | 4.55505   |
| 57 | -0.02492 | 4.90549   |
| 58 | -0.02610 | 5.25593   |
| 59 | -0.02716 | 5.60637   |
| 60 | -0.02811 | 5.95680   |
| 61 | -0.02896 | 6.30723   |
| 62 | -0.02971 | 6.65766   |
| 63 | -0.03038 | 7.00807   |

|    |          |          |
|----|----------|----------|
| 64 | -0.03097 | 7.35849  |
| 65 | -0.03150 | 7.70890  |
| 66 | -0.03197 | 8.05931  |
| 67 | -0.03239 | 8.40970  |
| 68 | -0.03276 | 8.76007  |
| 69 | -0.03309 | 9.11043  |
| 70 | -0.03339 | 9.46078  |
| 71 | -0.03366 | 9.81112  |
| 72 | -0.03391 | 10.16146 |
| 73 | -0.03414 | 10.51181 |
| 74 | -0.03435 | 10.86218 |
| 75 | -0.03456 | 11.21258 |
| 76 | -0.03475 | 11.56299 |
| 77 | -0.03493 | 11.91343 |
| 78 | -0.03511 | 12.26387 |
| 79 | -0.03529 | 12.61433 |
| 80 | -0.03545 | 12.96479 |
| 81 | -0.03562 | 13.31525 |
| 82 | -0.03578 | 13.66571 |
| 83 | -0.03594 | 14.01617 |
| 84 | -0.03610 | 14.36663 |
| 85 | -0.03625 | 14.71710 |
| 86 | -0.03640 | 15.06756 |
| 87 | -0.03655 | 15.41803 |
| 88 | -0.03670 | 15.76849 |
| 89 | -0.03685 | 16.11896 |
| 90 | -0.03700 | 16.46943 |
| 91 | -0.03714 | 16.81991 |
| 92 | -0.03729 | 17.17039 |
| 93 | -0.03743 | 17.52088 |

-----

### Energies of IRC to Tetrazole 36

Reaction path calculation complete.

Energies reported relative to the TS energy of -1137.605658

-----

#### Summary of reaction path following

|    | Energy   | RxCoord   |
|----|----------|-----------|
| 1  | -0.03961 | -17.01899 |
| 2  | -0.03945 | -16.67860 |
| 3  | -0.03930 | -16.33820 |
| 4  | -0.03913 | -15.99780 |
| 5  | -0.03895 | -15.65740 |
| 6  | -0.03876 | -15.31699 |
| 7  | -0.03857 | -14.97658 |
| 8  | -0.03836 | -14.63617 |
| 9  | -0.03815 | -14.29576 |
| 10 | -0.03792 | -13.95534 |
| 11 | -0.03769 | -13.61492 |
| 12 | -0.03744 | -13.27450 |
| 13 | -0.03718 | -12.93408 |
| 14 | -0.03690 | -12.59366 |
| 15 | -0.03661 | -12.25325 |
| 16 | -0.03631 | -11.91283 |
| 17 | -0.03600 | -11.57243 |
| 18 | -0.03567 | -11.23202 |
| 19 | -0.03533 | -10.89162 |
| 20 | -0.03497 | -10.55123 |
| 21 | -0.03459 | -10.21085 |
| 22 | -0.03419 | -9.87048  |
| 23 | -0.03377 | -9.53011  |
| 24 | -0.03333 | -9.18975  |
| 25 | -0.03286 | -8.84939  |
| 26 | -0.03236 | -8.50903  |
| 27 | -0.03183 | -8.16867  |
| 28 | -0.03126 | -7.82832  |
| 29 | -0.03064 | -7.48796  |
| 30 | -0.02997 | -7.14761  |
| 31 | -0.02925 | -6.80726  |

|    |          |          |
|----|----------|----------|
| 32 | -0.02847 | -6.46690 |
| 33 | -0.02762 | -6.12655 |
| 34 | -0.02670 | -5.78619 |
| 35 | -0.02570 | -5.44584 |
| 36 | -0.02461 | -5.10548 |
| 37 | -0.02342 | -4.76511 |
| 38 | -0.02212 | -4.42475 |
| 39 | -0.02071 | -4.08438 |
| 40 | -0.01919 | -3.74403 |
| 41 | -0.01753 | -3.40368 |
| 42 | -0.01574 | -3.06334 |
| 43 | -0.01382 | -2.72300 |
| 44 | -0.01179 | -2.38266 |
| 45 | -0.00966 | -2.04232 |
| 46 | -0.00749 | -1.70197 |
| 47 | -0.00535 | -1.36160 |
| 48 | -0.00335 | -1.02121 |
| 49 | -0.00166 | -0.68082 |
| 50 | -0.00046 | -0.34045 |
| 51 | 0.00000  | 0.00000  |
| 52 | -0.00054 | 0.34040  |
| 53 | -0.00234 | 0.68079  |
| 54 | -0.00556 | 1.02120  |
| 55 | -0.01032 | 1.36162  |
| 56 | -0.01658 | 1.70205  |
| 57 | -0.02419 | 2.04246  |
| 58 | -0.03292 | 2.38286  |
| 59 | -0.04245 | 2.72323  |
| 60 | -0.05248 | 3.06358  |
| 61 | -0.06268 | 3.40392  |
| 62 | -0.07272 | 3.74426  |
| 63 | -0.08217 | 4.08462  |
| 64 | -0.09048 | 4.42497  |
| 65 | -0.09687 | 4.76493  |
| 66 | -0.10074 | 5.09999  |
| 67 | -0.10300 | 5.43359  |
| 68 | -0.10481 | 5.77319  |
| 69 | -0.10634 | 6.11327  |
| 70 | -0.10763 | 6.45347  |
| 71 | -0.10872 | 6.79370  |
| 72 | -0.10962 | 7.13386  |
| 73 | -0.11035 | 7.47388  |
| 74 | -0.11093 | 7.81367  |
| 75 | -0.11140 | 8.15320  |
| 76 | -0.11177 | 8.49262  |
| 77 | -0.11207 | 8.83218  |
| 78 | -0.11233 | 9.17199  |
| 79 | -0.11257 | 9.51201  |
| 80 | -0.11278 | 9.85218  |
| 81 | -0.11297 | 10.19245 |
| 82 | -0.11315 | 10.53279 |
| 83 | -0.11332 | 10.87318 |
| 84 | -0.11348 | 11.21359 |
| 85 | -0.11363 | 11.55401 |
| 86 | -0.11377 | 11.89443 |
| 87 | -0.11390 | 12.23485 |
| 88 | -0.11402 | 12.57528 |
| 89 | -0.11414 | 12.91572 |
| 90 | -0.11425 | 13.25616 |
| 91 | -0.11435 | 13.59660 |
| 92 | -0.11445 | 13.93705 |
| 93 | -0.11454 | 14.27750 |
| 94 | -0.11462 | 14.61795 |
| 95 | -0.11470 | 14.95837 |
| 96 | -0.11477 | 15.29879 |
| 97 | -0.11484 | 15.63920 |
| 98 | -0.11490 | 15.97959 |
| 99 | -0.11495 | 16.31998 |

---

### 3-Inhibitory activity against glycosidases.

Inhibitory activity of glycotetrazoles **13** and **14** was evaluated against 11 commercial glycosidases\* with negative results except for **14**  $\beta$ -glucosidase from almonds and for **13** with  $\beta$ -galactosidase from *Aspergillus orizae*, with weak although selective results.

| Glycosidases                                            | Percentage Inhibition (1mM)                                                                     |                                                                                                  |
|---------------------------------------------------------|-------------------------------------------------------------------------------------------------|--------------------------------------------------------------------------------------------------|
|                                                         | 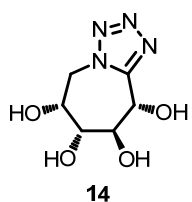<br><b>14</b> | <br><b>13</b> |
| 1. $\alpha$ -L-fucosidase (bovine kidney)               | –                                                                                               | –                                                                                                |
| 2. $\alpha$ -galactosidase (coffee beans)               | –                                                                                               | –                                                                                                |
| 3. $\beta$ -galactosidase ( <i>Escherichia coli</i> )   | –                                                                                               | –                                                                                                |
| 4. $\beta$ -galactosidase ( <i>Aspergillus orizae</i> ) | 16%                                                                                             | –                                                                                                |
| 5. $\alpha$ -glucosidase (yeast)                        | –                                                                                               | –                                                                                                |
| 6. $\alpha$ -glucosidase (rice)                         | –                                                                                               | –                                                                                                |
| 7. amiloglucosidase ( <i>Aspergillus niger</i> )        | –                                                                                               | –                                                                                                |
| 8. $\beta$ -glucosidase (almonds)                       | –                                                                                               | 38%                                                                                              |
| 9. $\alpha$ -mannosidase (beans)                        | –                                                                                               | –                                                                                                |
| 10. $\beta$ -mannosidase (snail)                        | –                                                                                               | –                                                                                                |
| 11. $\beta$ -N-acetylglucosaminidase (beans)            | –                                                                                               | –                                                                                                |

\* Tests were carried out by Dr. I. Robina group, (Organic Chemistry Department) University of Seville.



## Supporting Information - B

### Synthesis of Tetrazole-Fused Azepanes and Quantum Chemical Topology Study on the Mechanism of the Intramolecular Cycloaddition Reaction.

M. S. Pino-Gonzalez,<sup>a\*</sup> A. Romero-Carrasco,<sup>a</sup> S. Calvo-Losada,<sup>b\*</sup> N. Oña-Bernal,<sup>a</sup>  
J. Quirante<sup>b</sup> and F. Sarabia<sup>a</sup>

a. Department of Organic Chemistry. Faculty of Sciences. Campus de Teatinos, s/n.  
University of Málaga. 29071 Málaga (Spain). E-mail: pino@uma.es

b. Department of Physical Chemistry. Faculty of Sciences. Campus de Teatinos, s/n.  
University of Málaga. 29071 Málaga (Spain). E-mail: asenruhup@hotmail.com

**Contents: NMR spectra of the synthesized compounds**



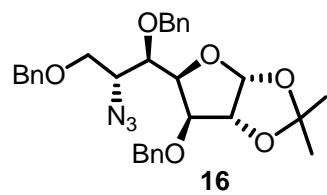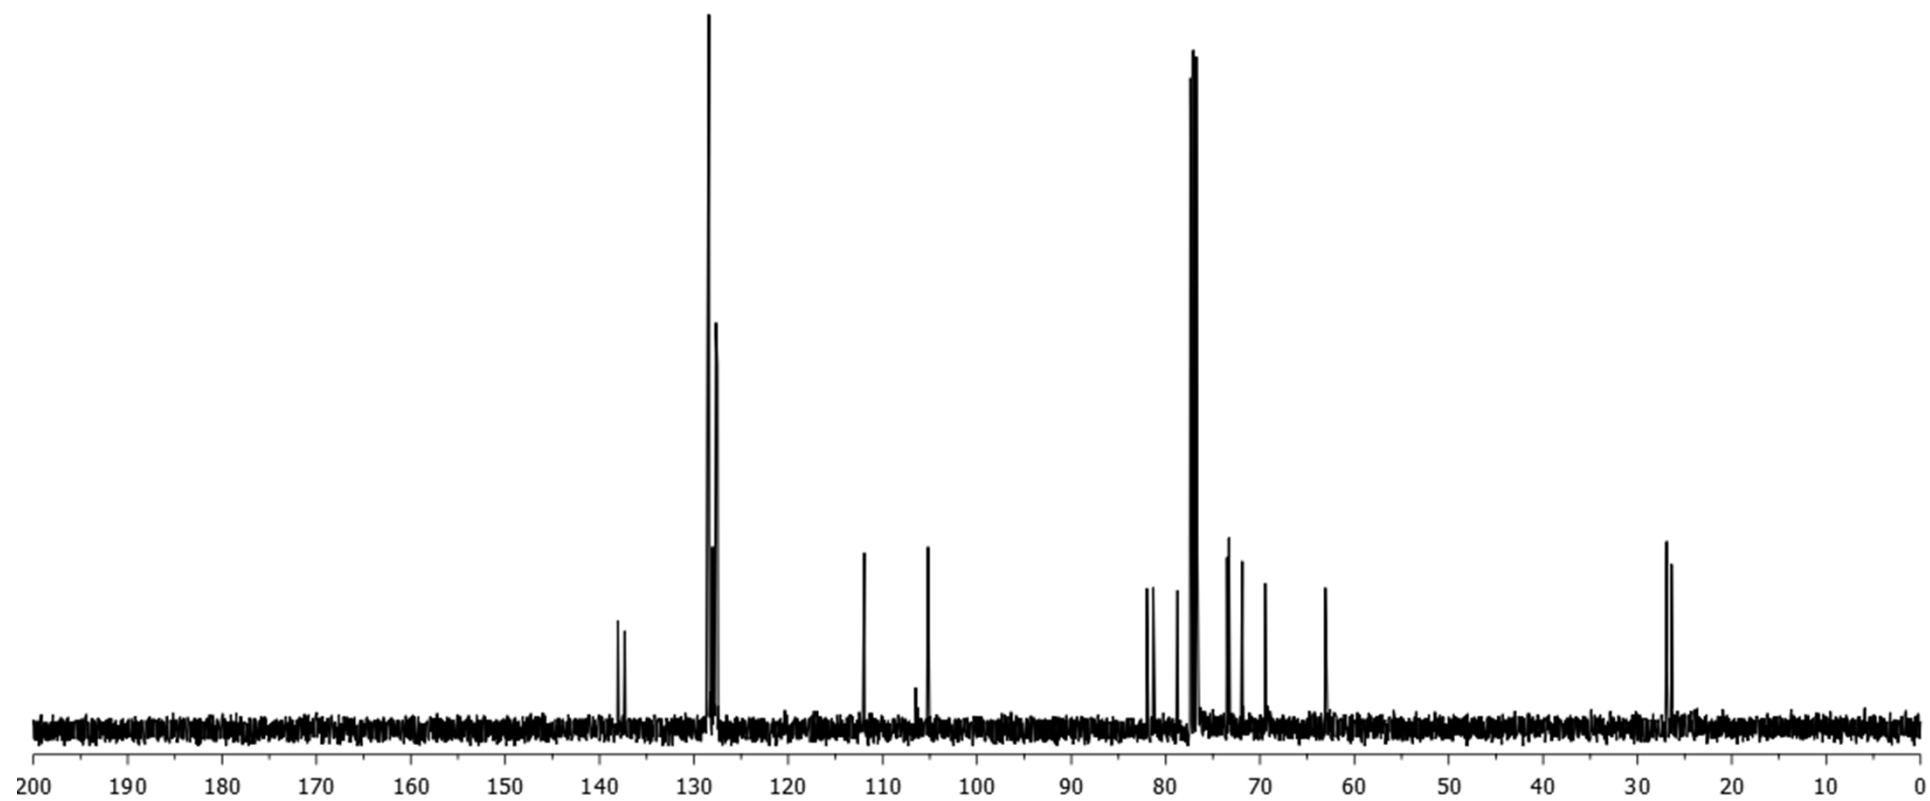

<sup>13</sup>C-RMN (CDCl<sub>3</sub>, 100 MHz, δ ppm)

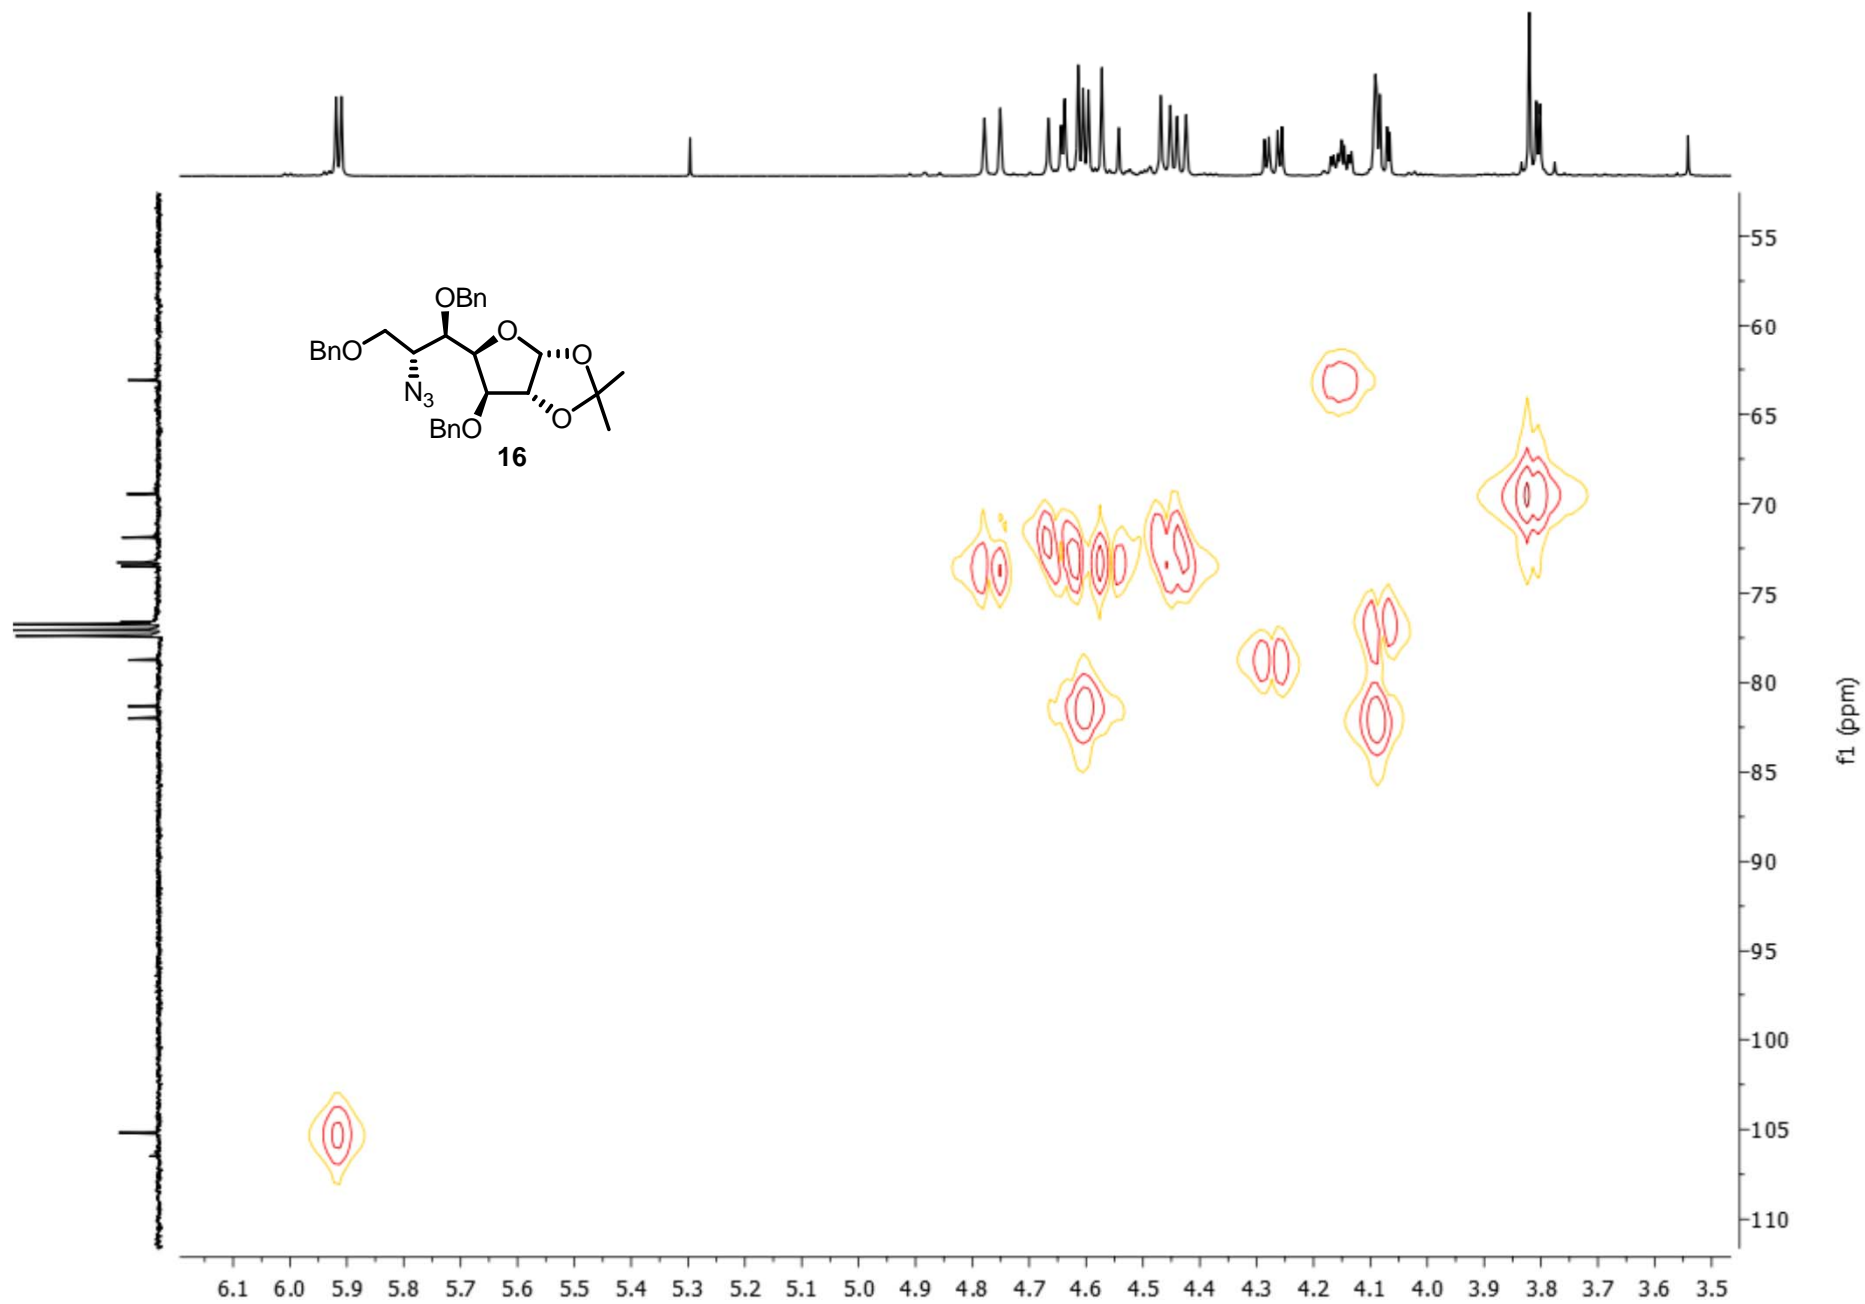

$^1H$ -RMN (CDCl<sub>3</sub>, 400 MHz,  $\delta$  ppm)

$^{13}C$ -RMN (CDCl<sub>3</sub>, 100 MHz,  $\delta$  ppm)

HMQC

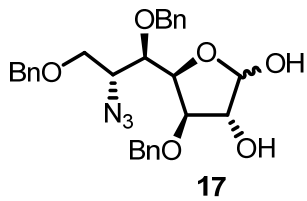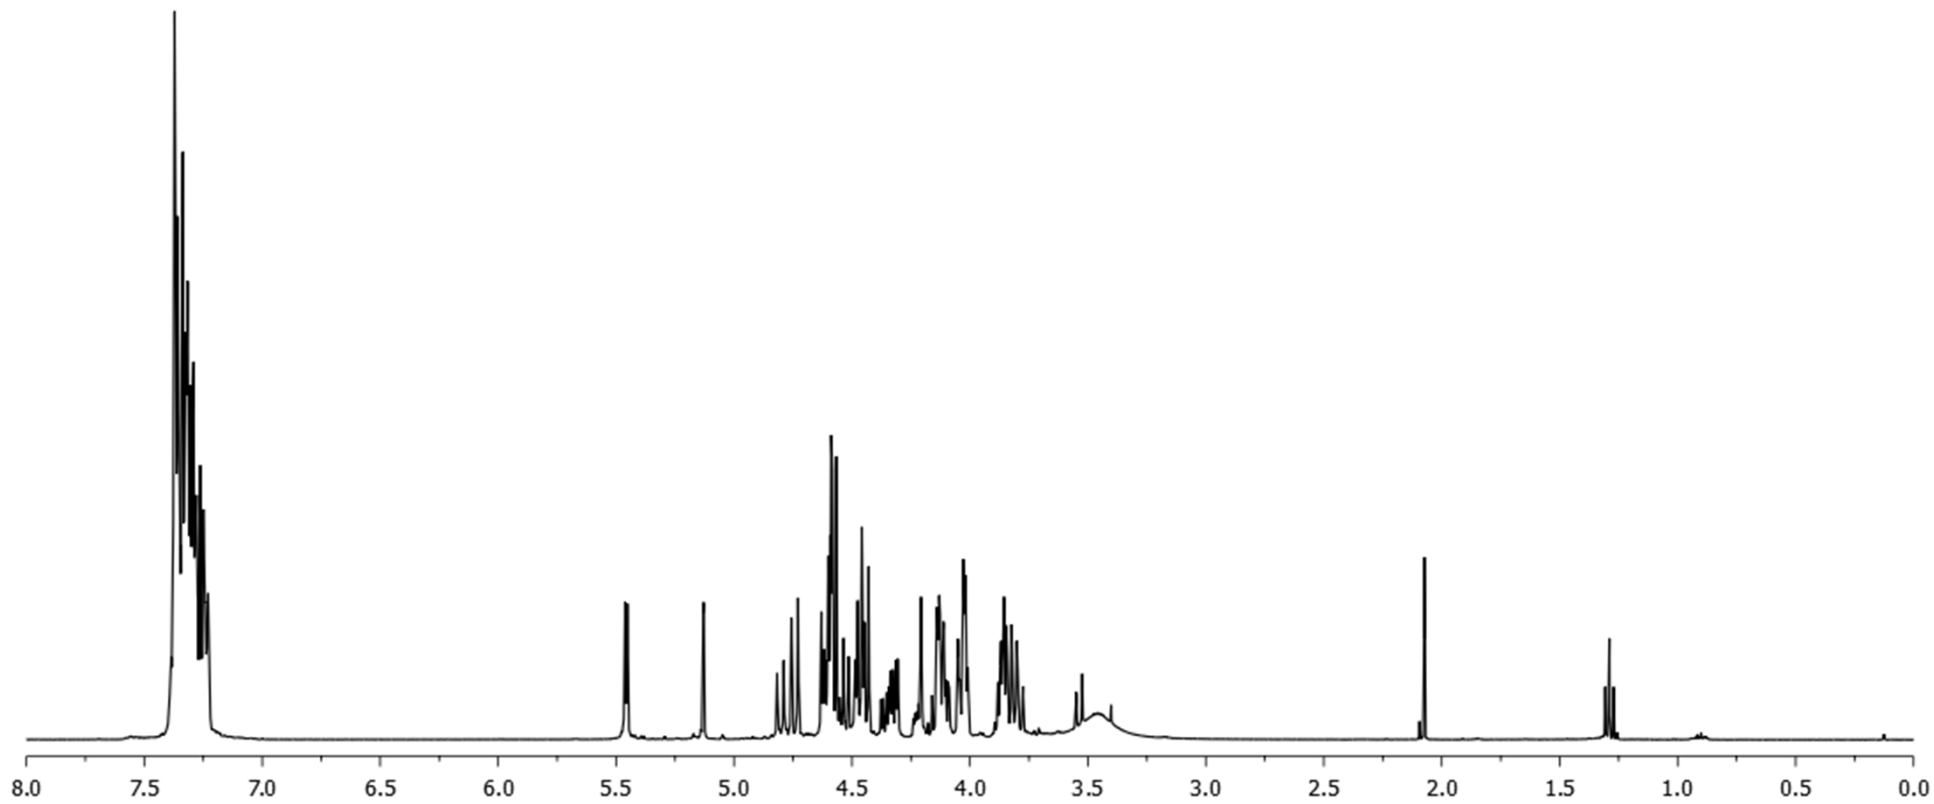

$^1\text{H-NMR}$  ( $\text{CDCl}_3$ , 400 MHz,  $\delta$  ppm)

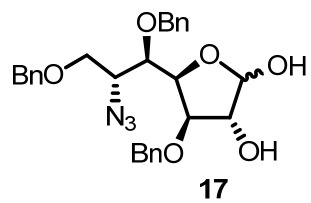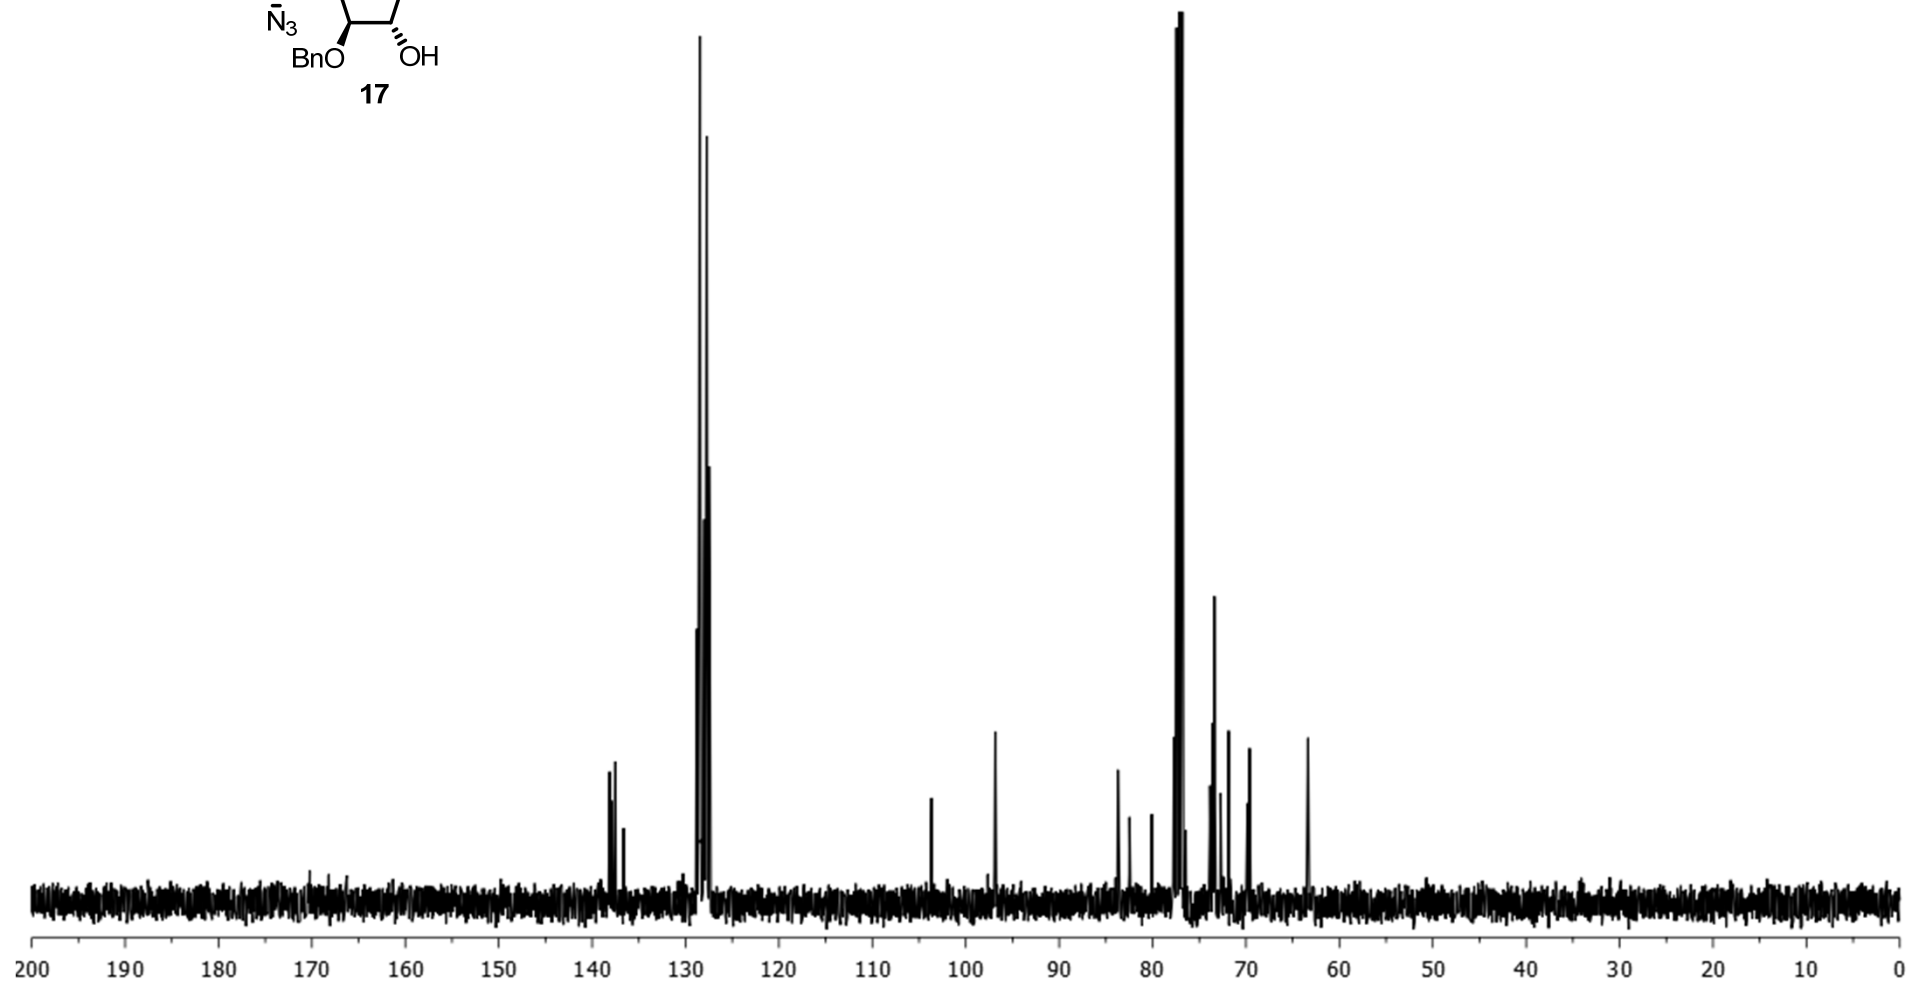

$^{13}\text{C}$ -RMN ( $\text{CDCl}_3$ , 100 MHz,  $\delta$  ppm)

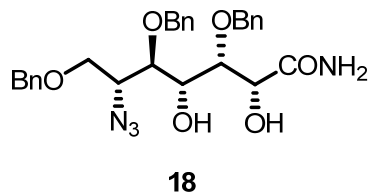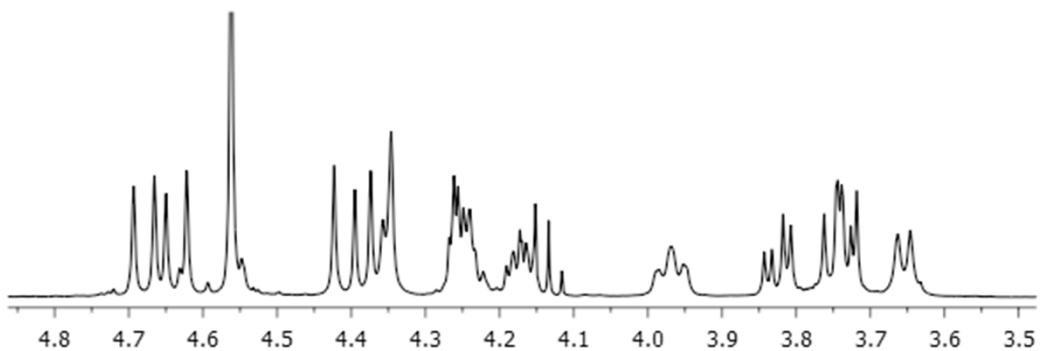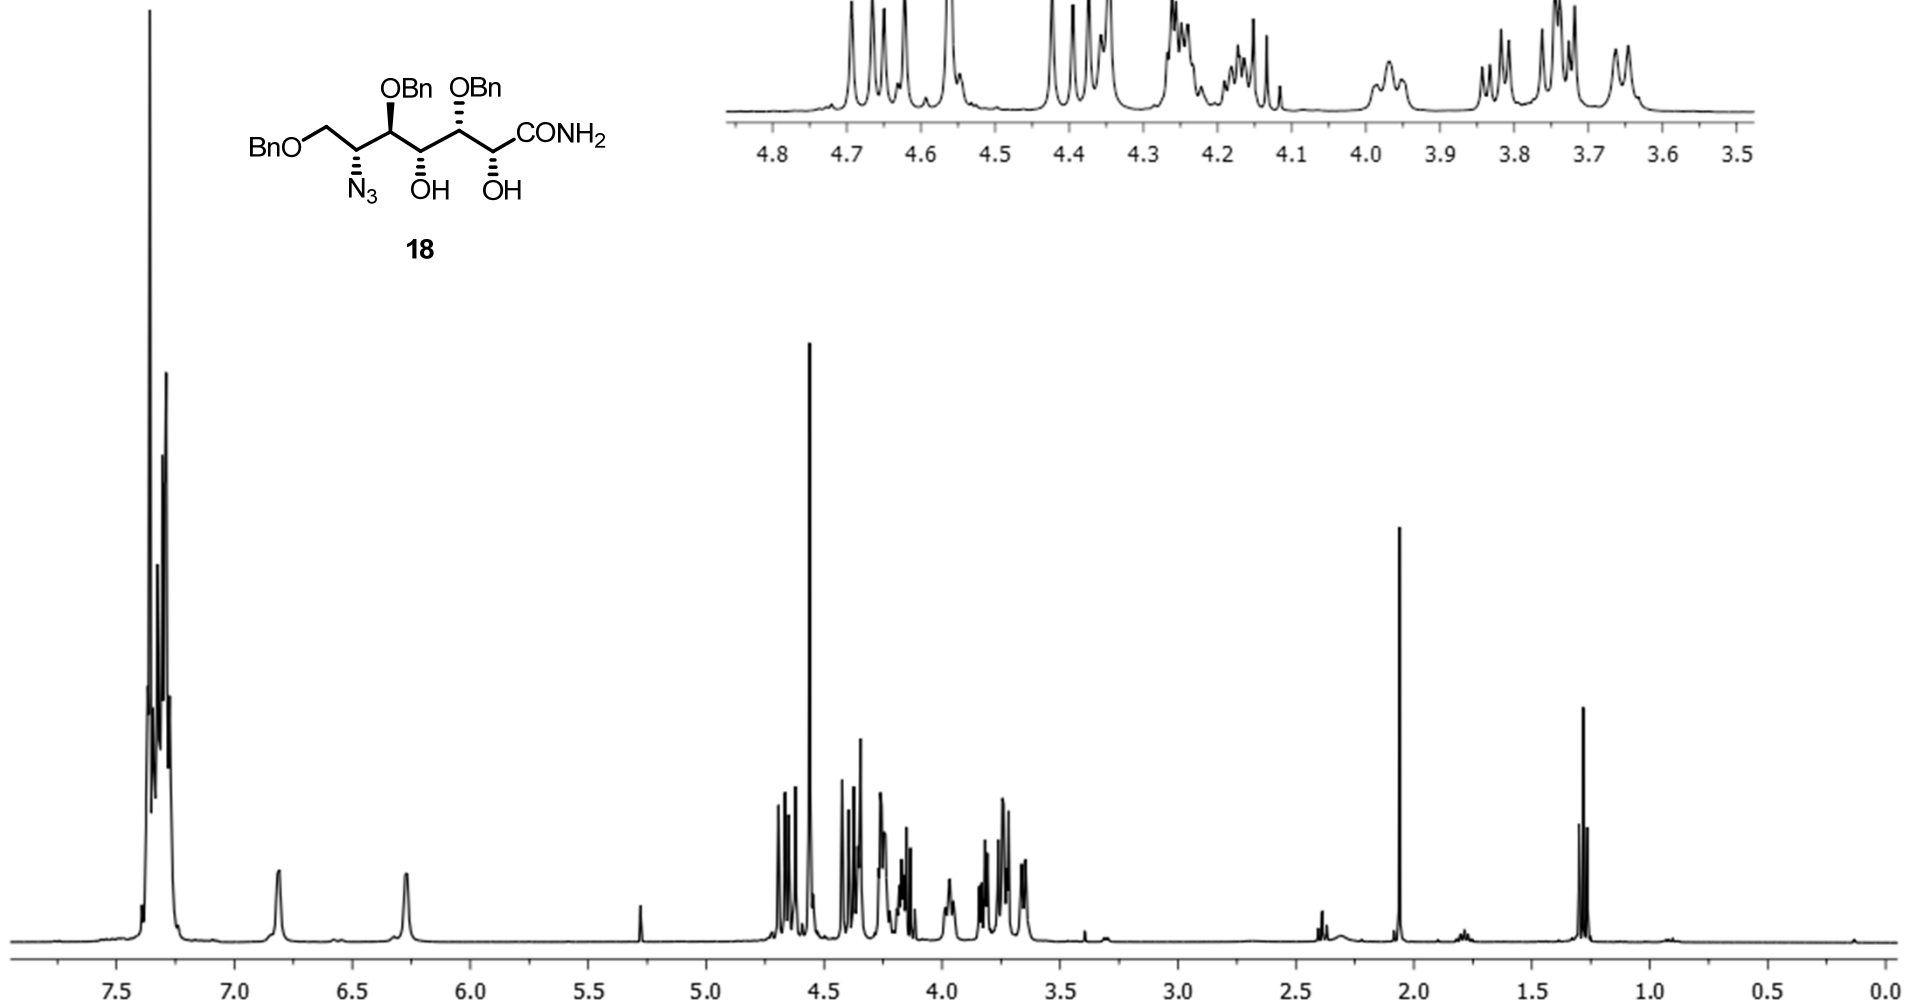

<sup>1</sup>H-RMN (CDCl<sub>3</sub>, 400 MHz, δ ppm)

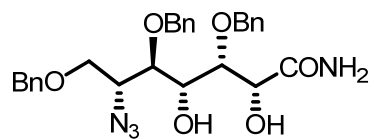

18

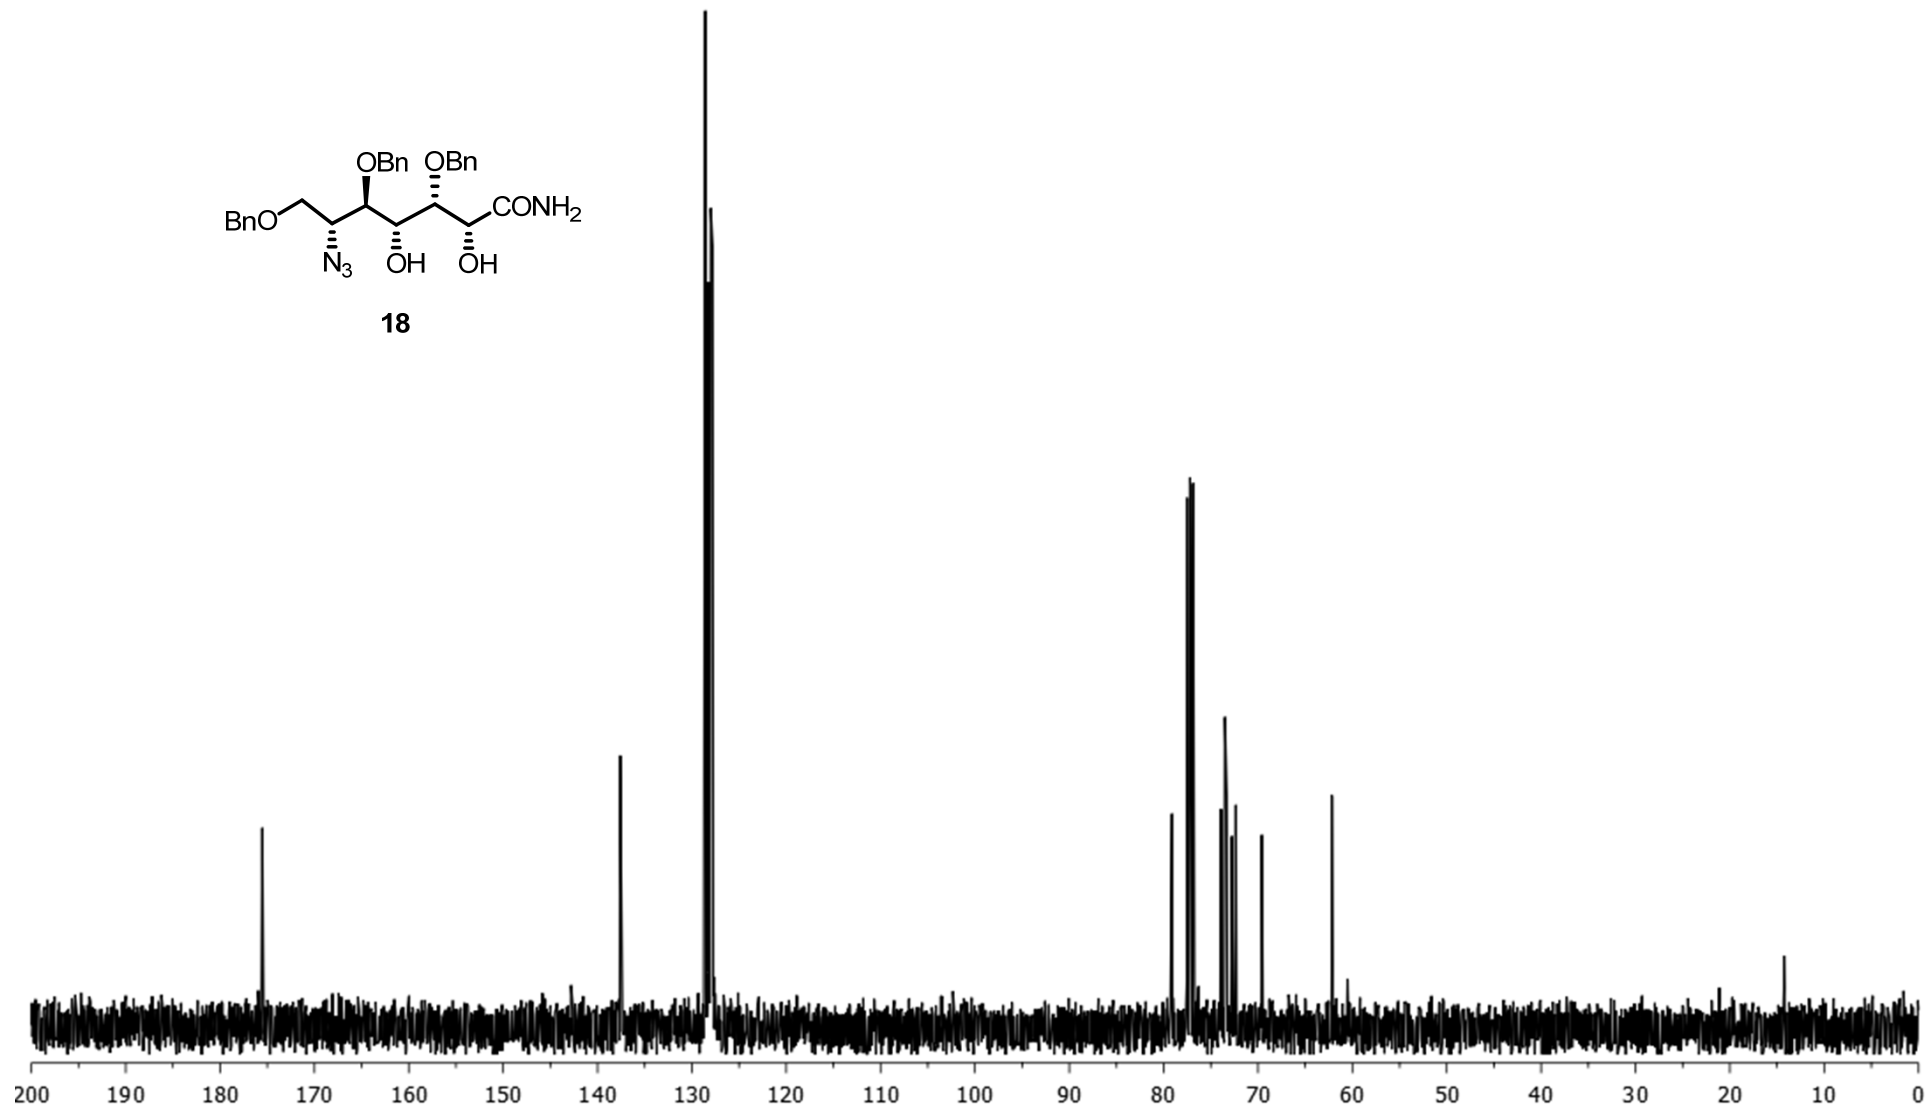

<sup>13</sup>C-RMN (CDCl<sub>3</sub>, 100 MHz, δ ppm)



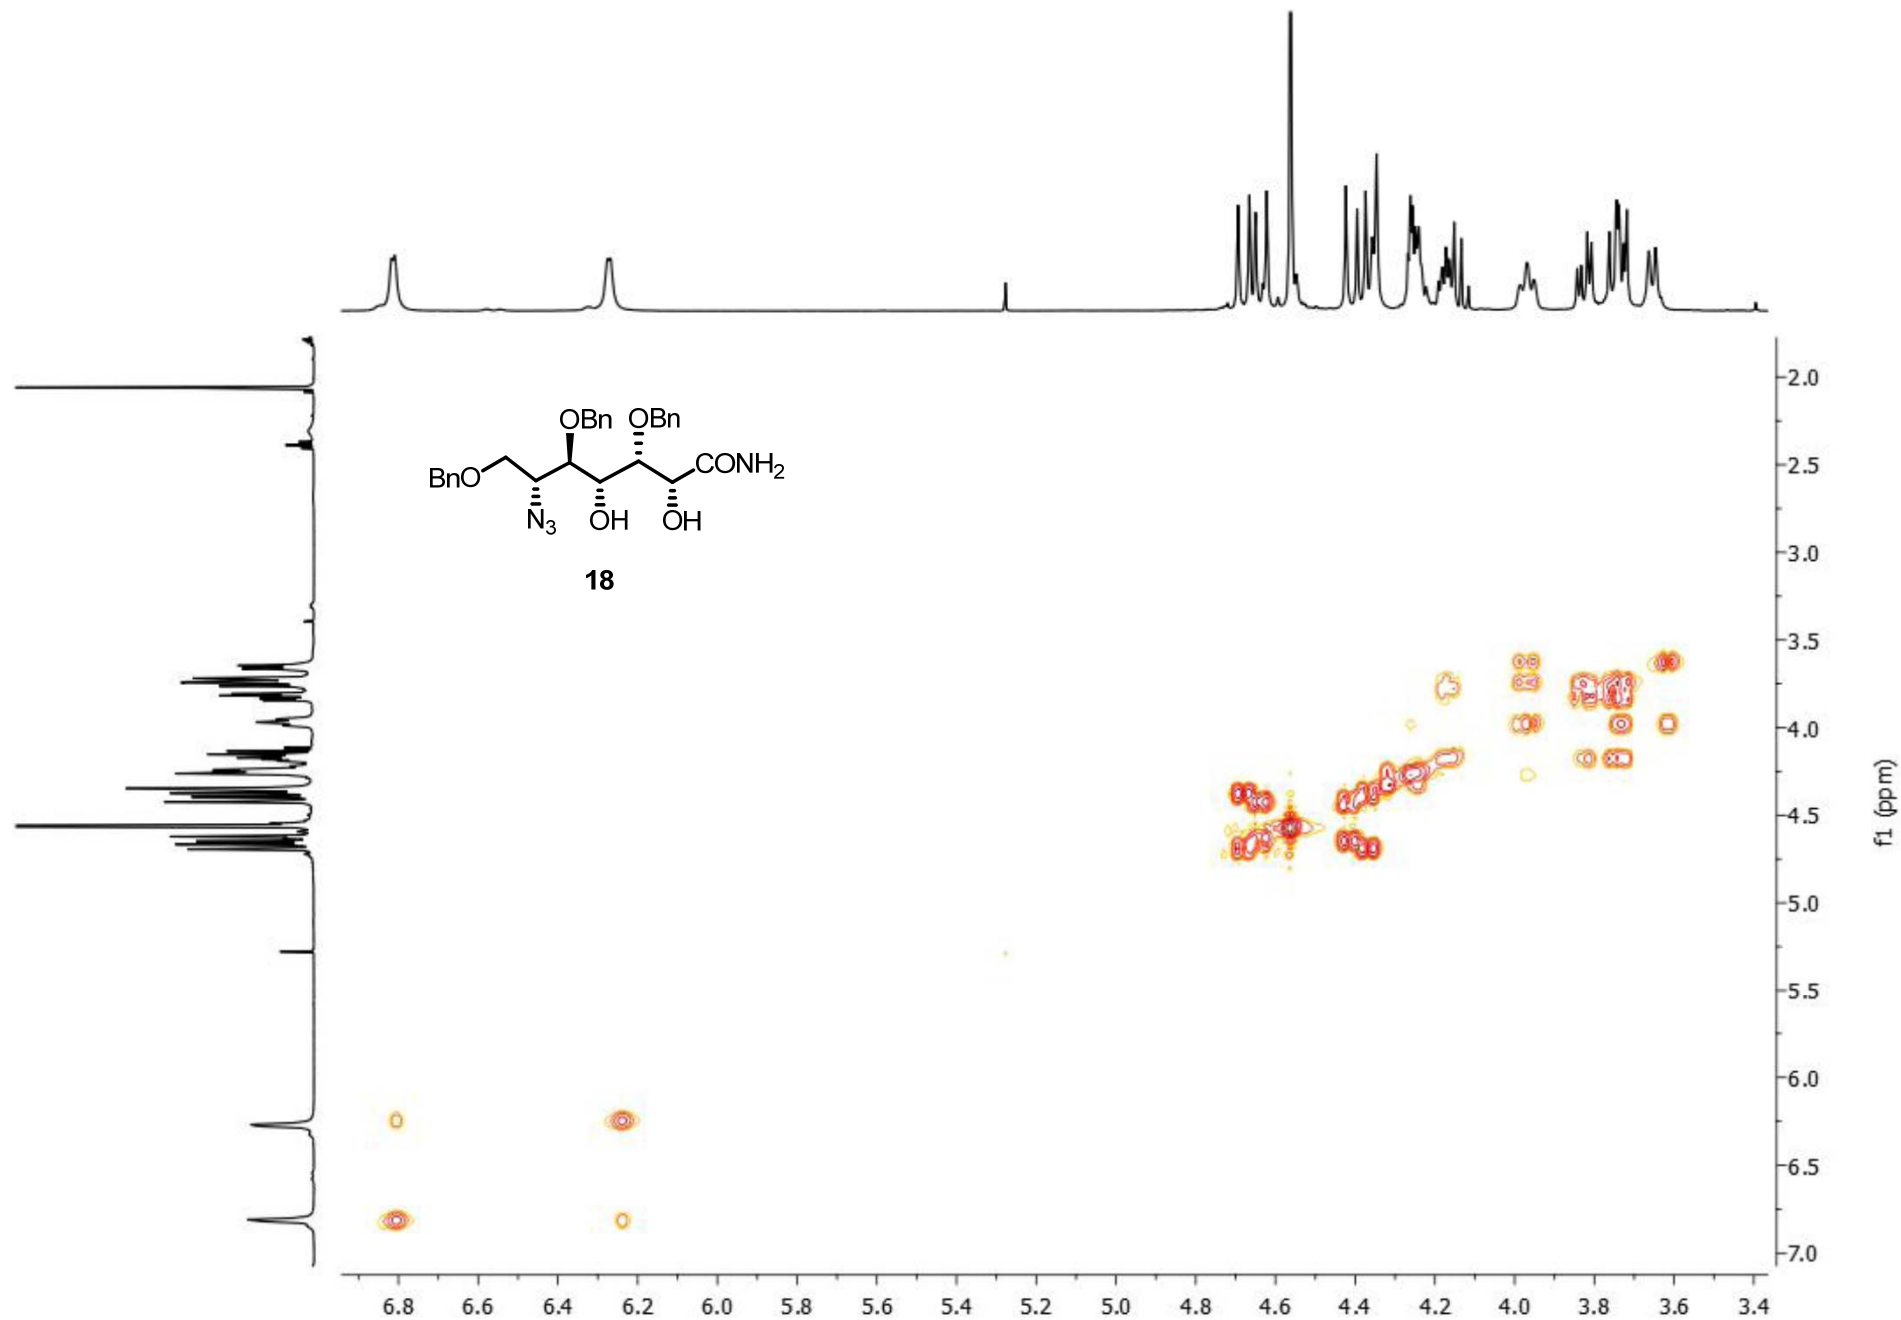

$^1\text{H}$ -RMN ( $\text{CDCl}_3$ , 400 MHz,  $\delta$  ppm) COSY

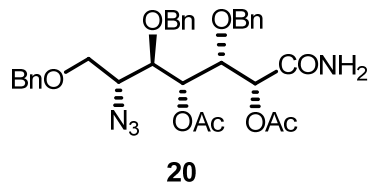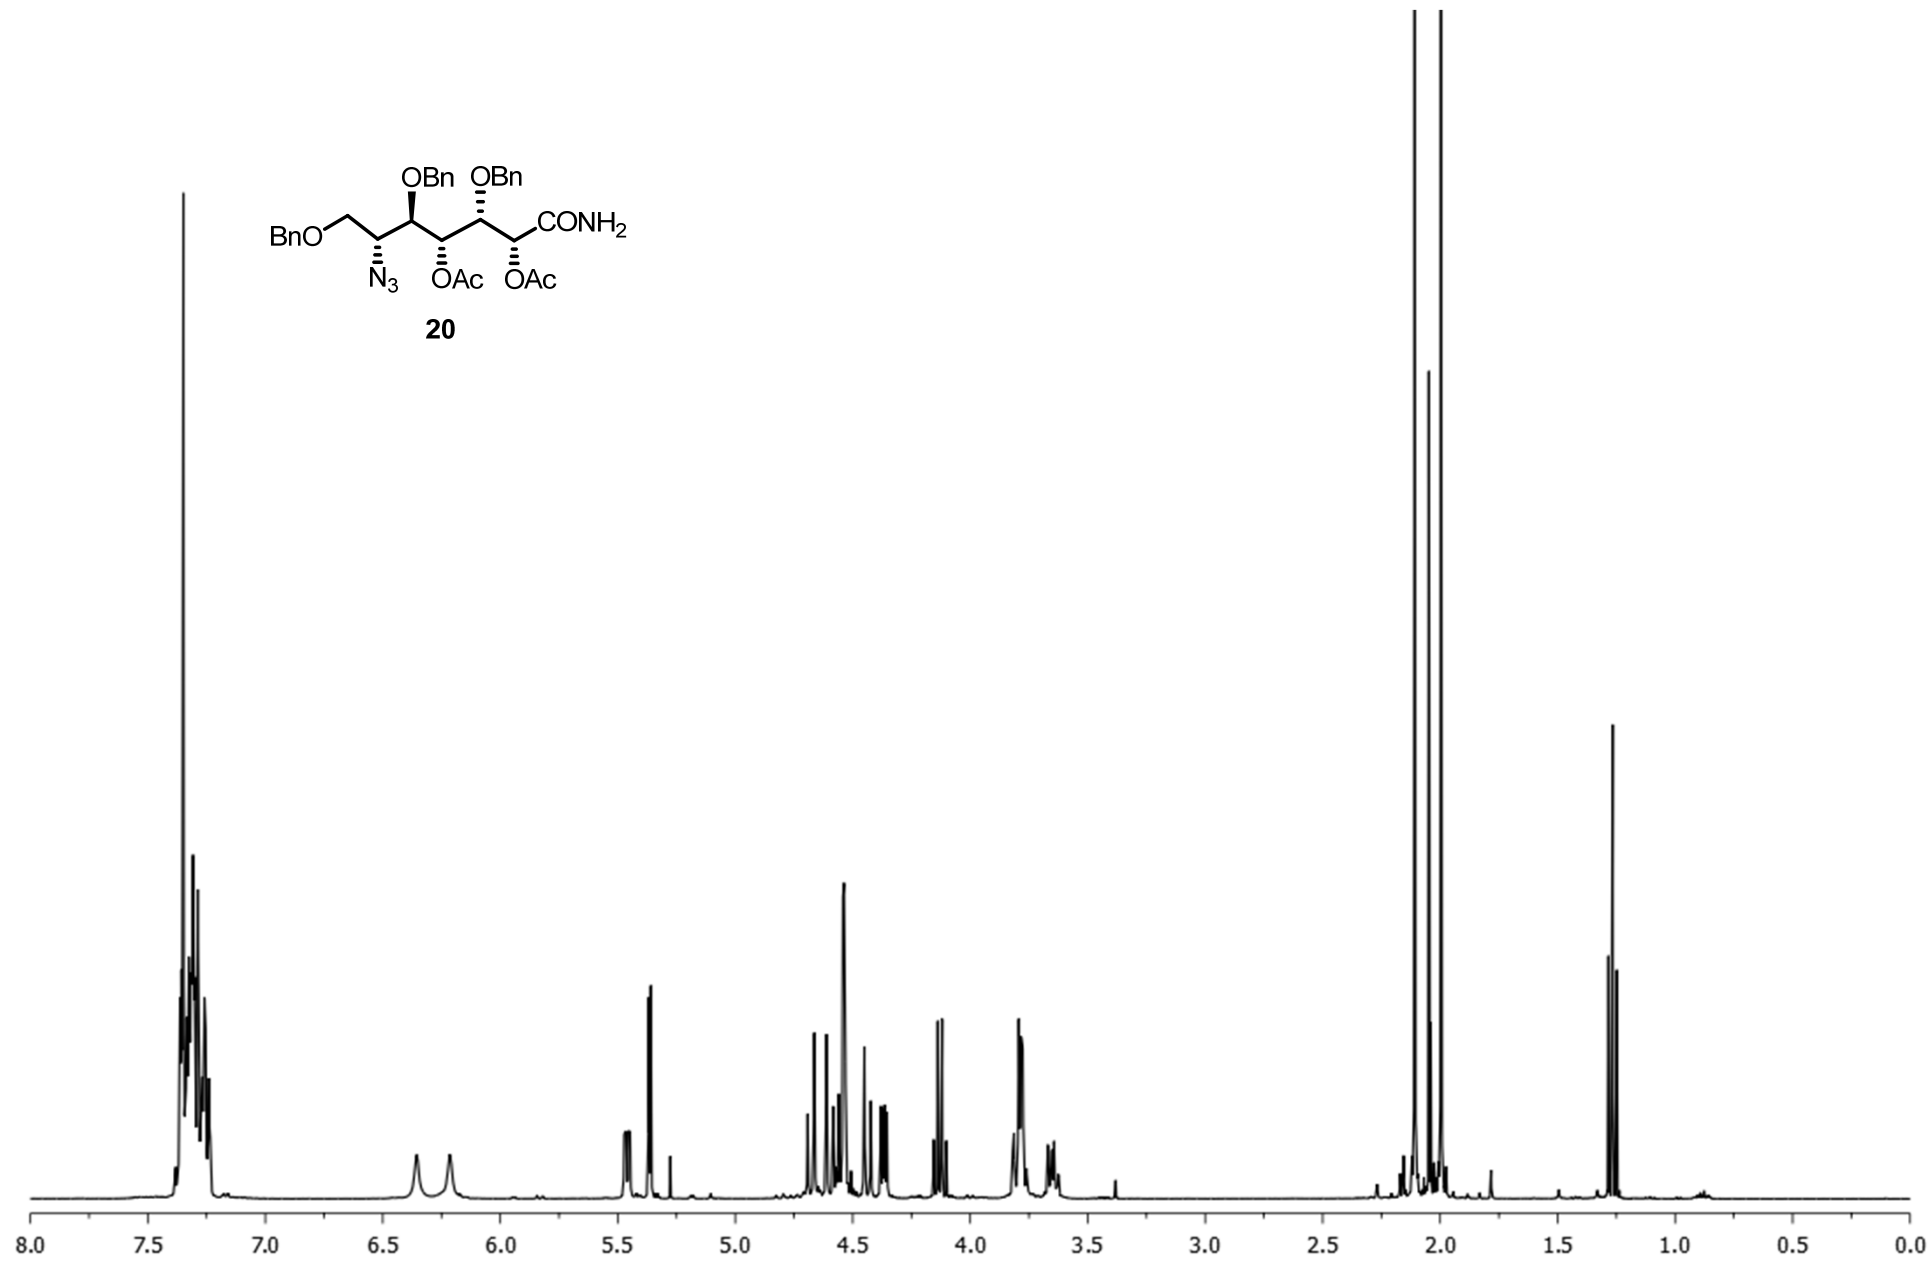

$^1\text{H}$ -RMN ( $\text{CDCl}_3$ , 400 MHz,  $\delta$  ppm)

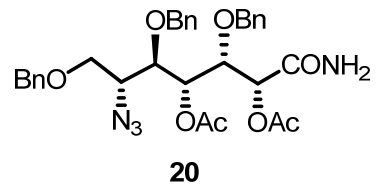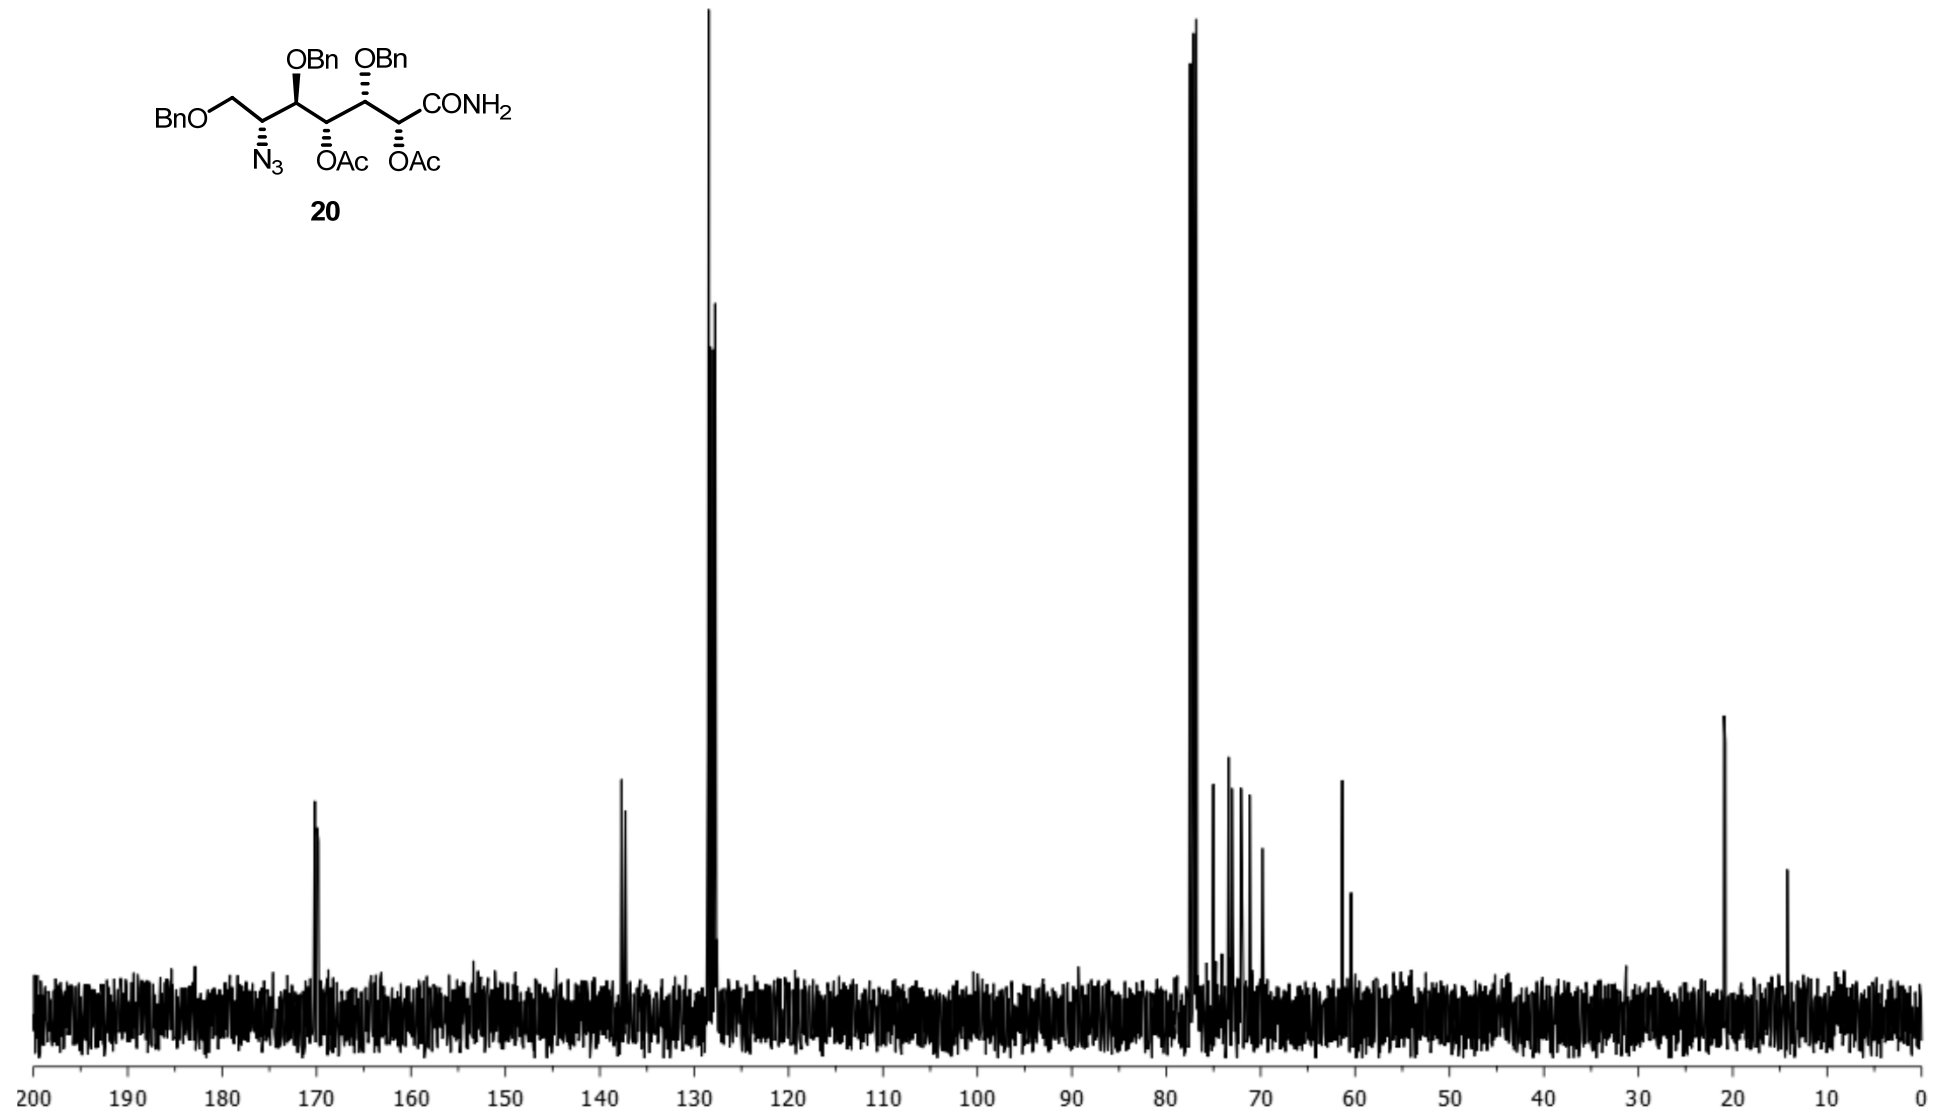

<sup>13</sup>C-RMN (CDCl<sub>3</sub>, 100 MHz, δ ppm)

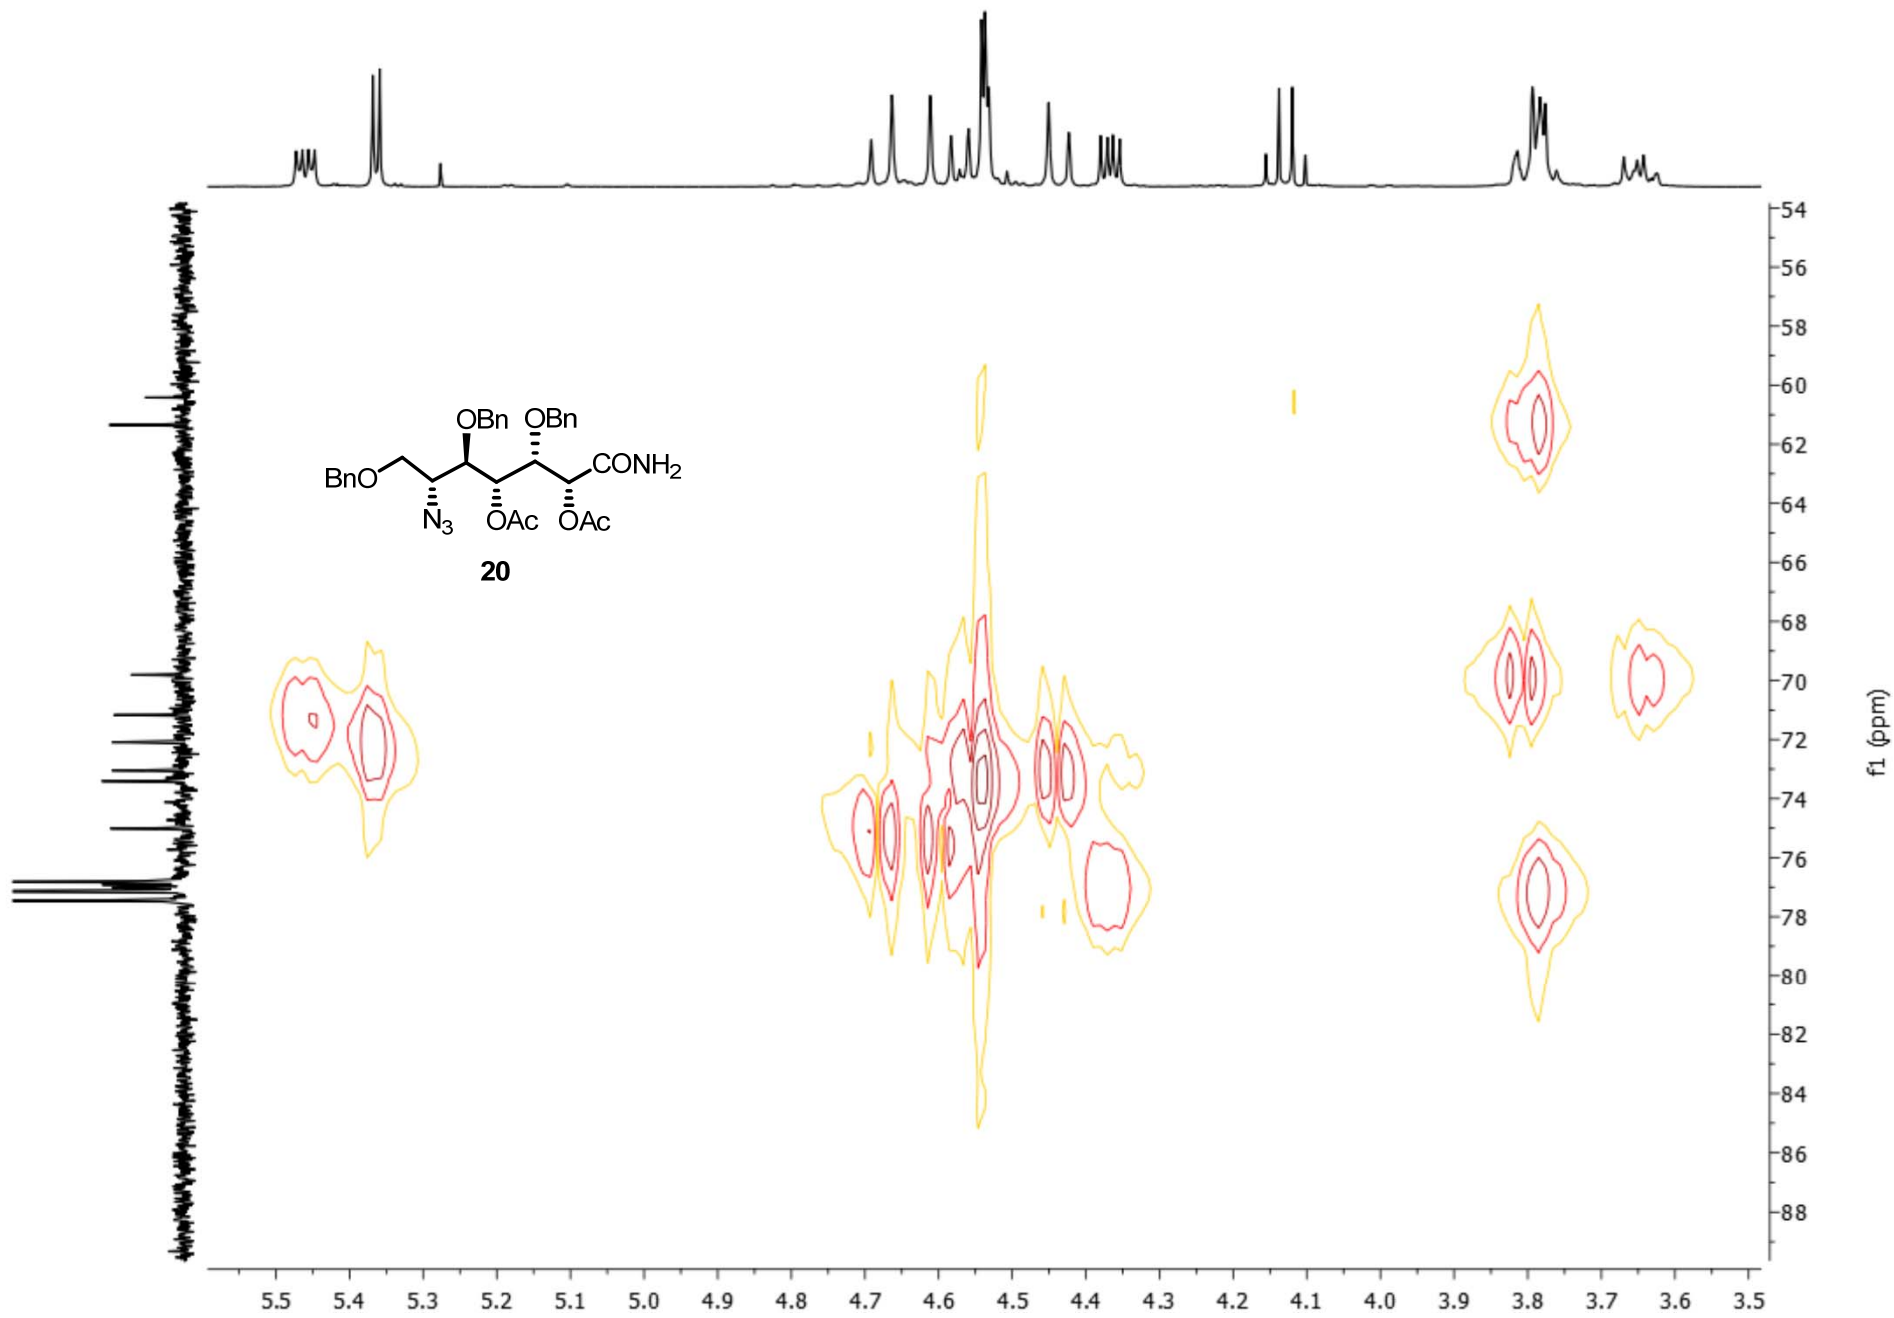

$^1\text{H}$ -RMN ( $\text{CDCl}_3$ , 400 MHz,  $\delta$  ppm)

$^{13}\text{C}$ -RMN ( $\text{CDCl}_3$ , 100 MHz,  $\delta$  ppm)

HMQC

12

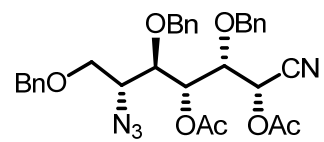

**21**

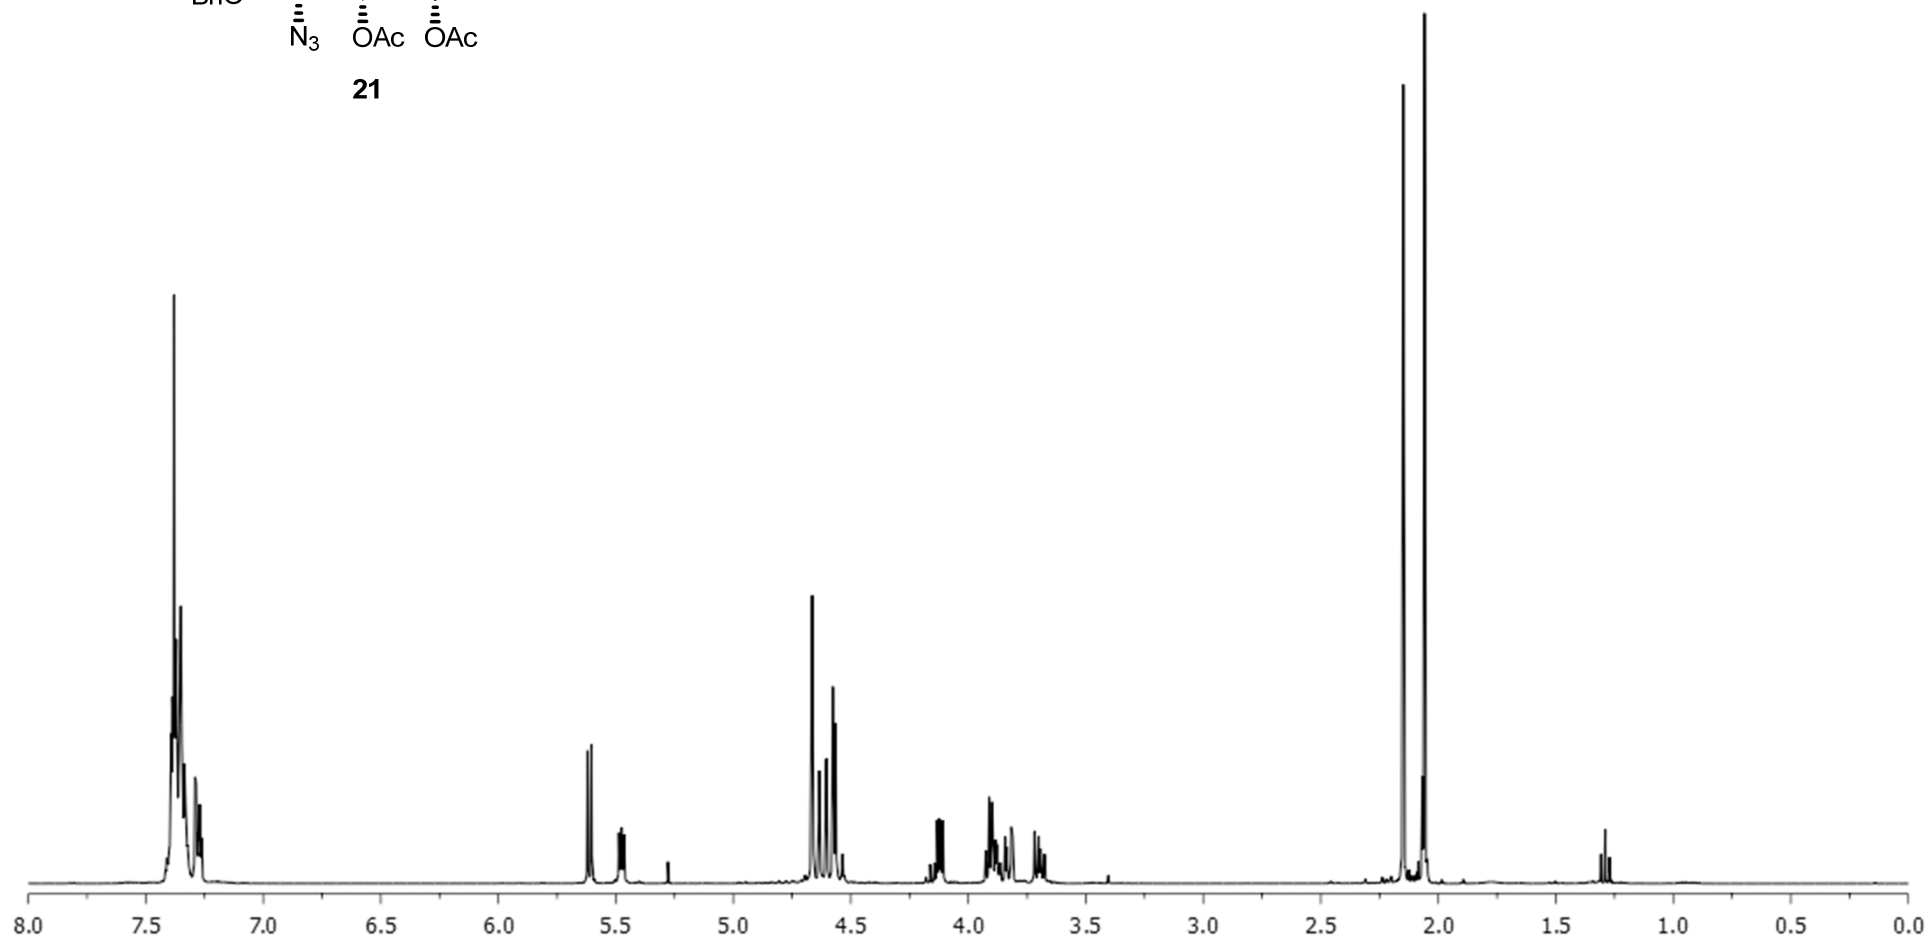

<sup>1</sup>H-RMN (CDCl<sub>3</sub>, 400 MHz, δ ppm)

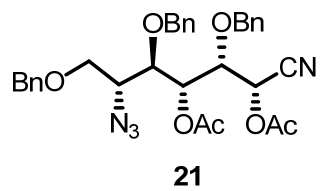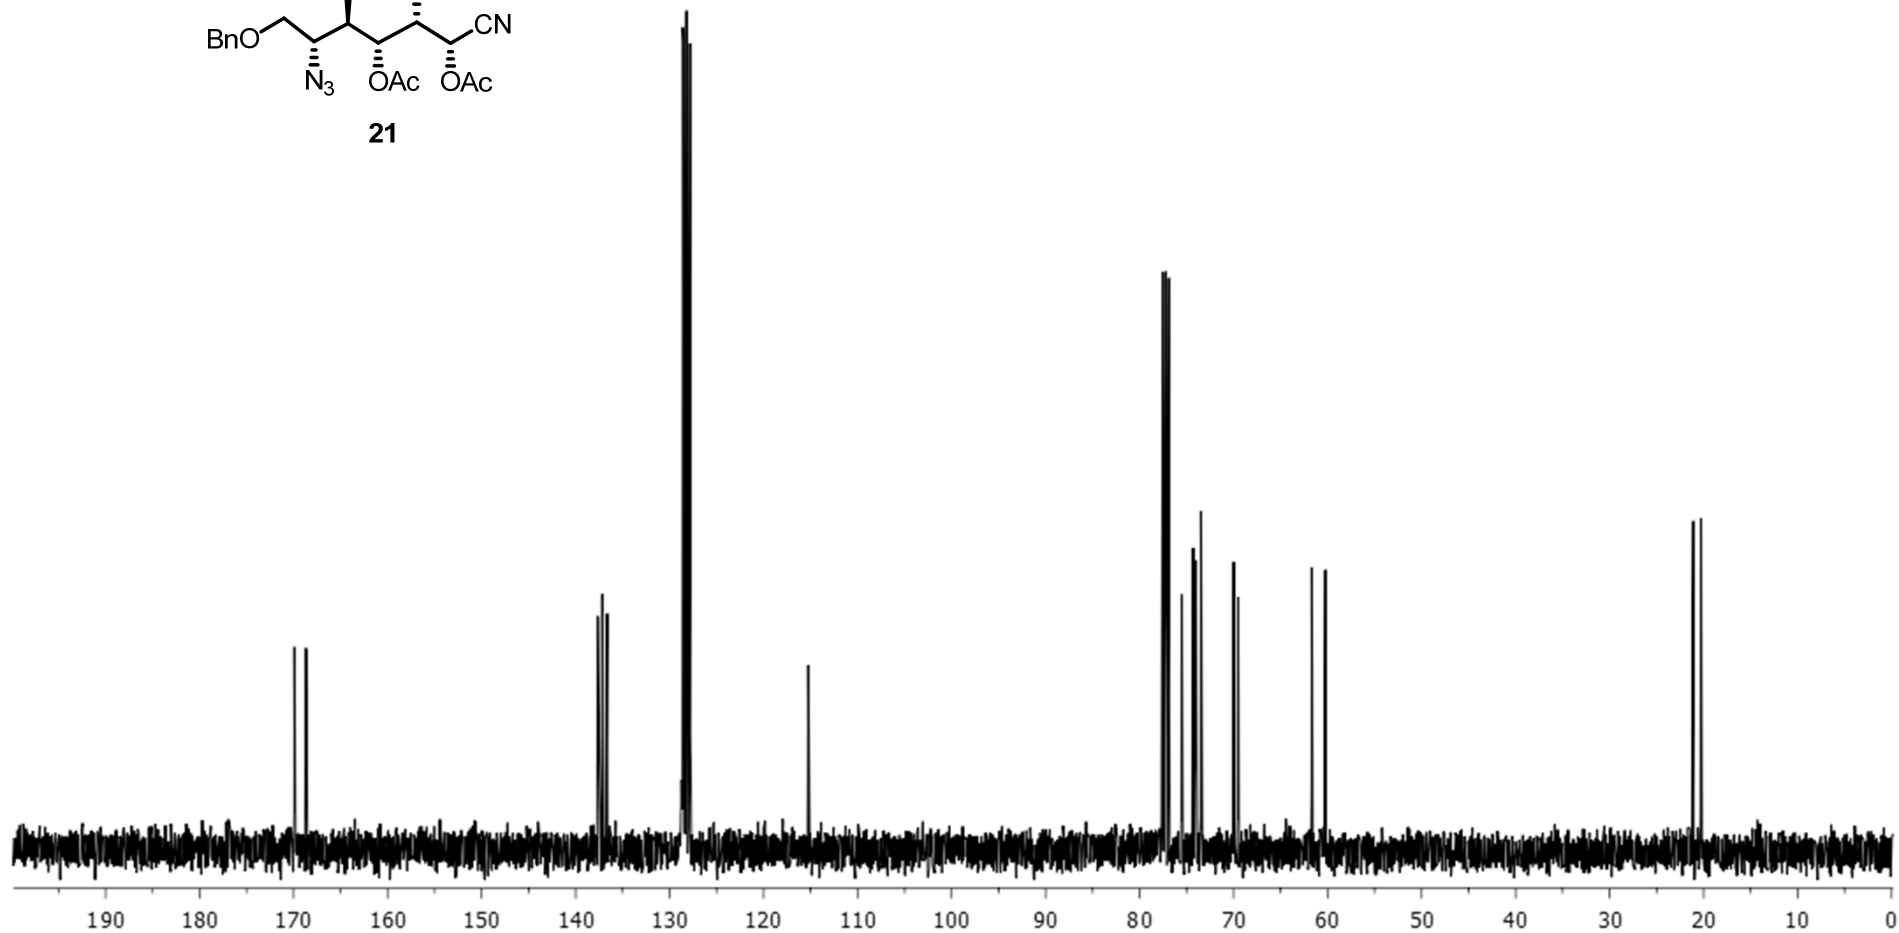

$^{13}\text{C}$ -RMN ( $\text{CDCl}_3$ , 100 MHz,  $\delta$  ppm)

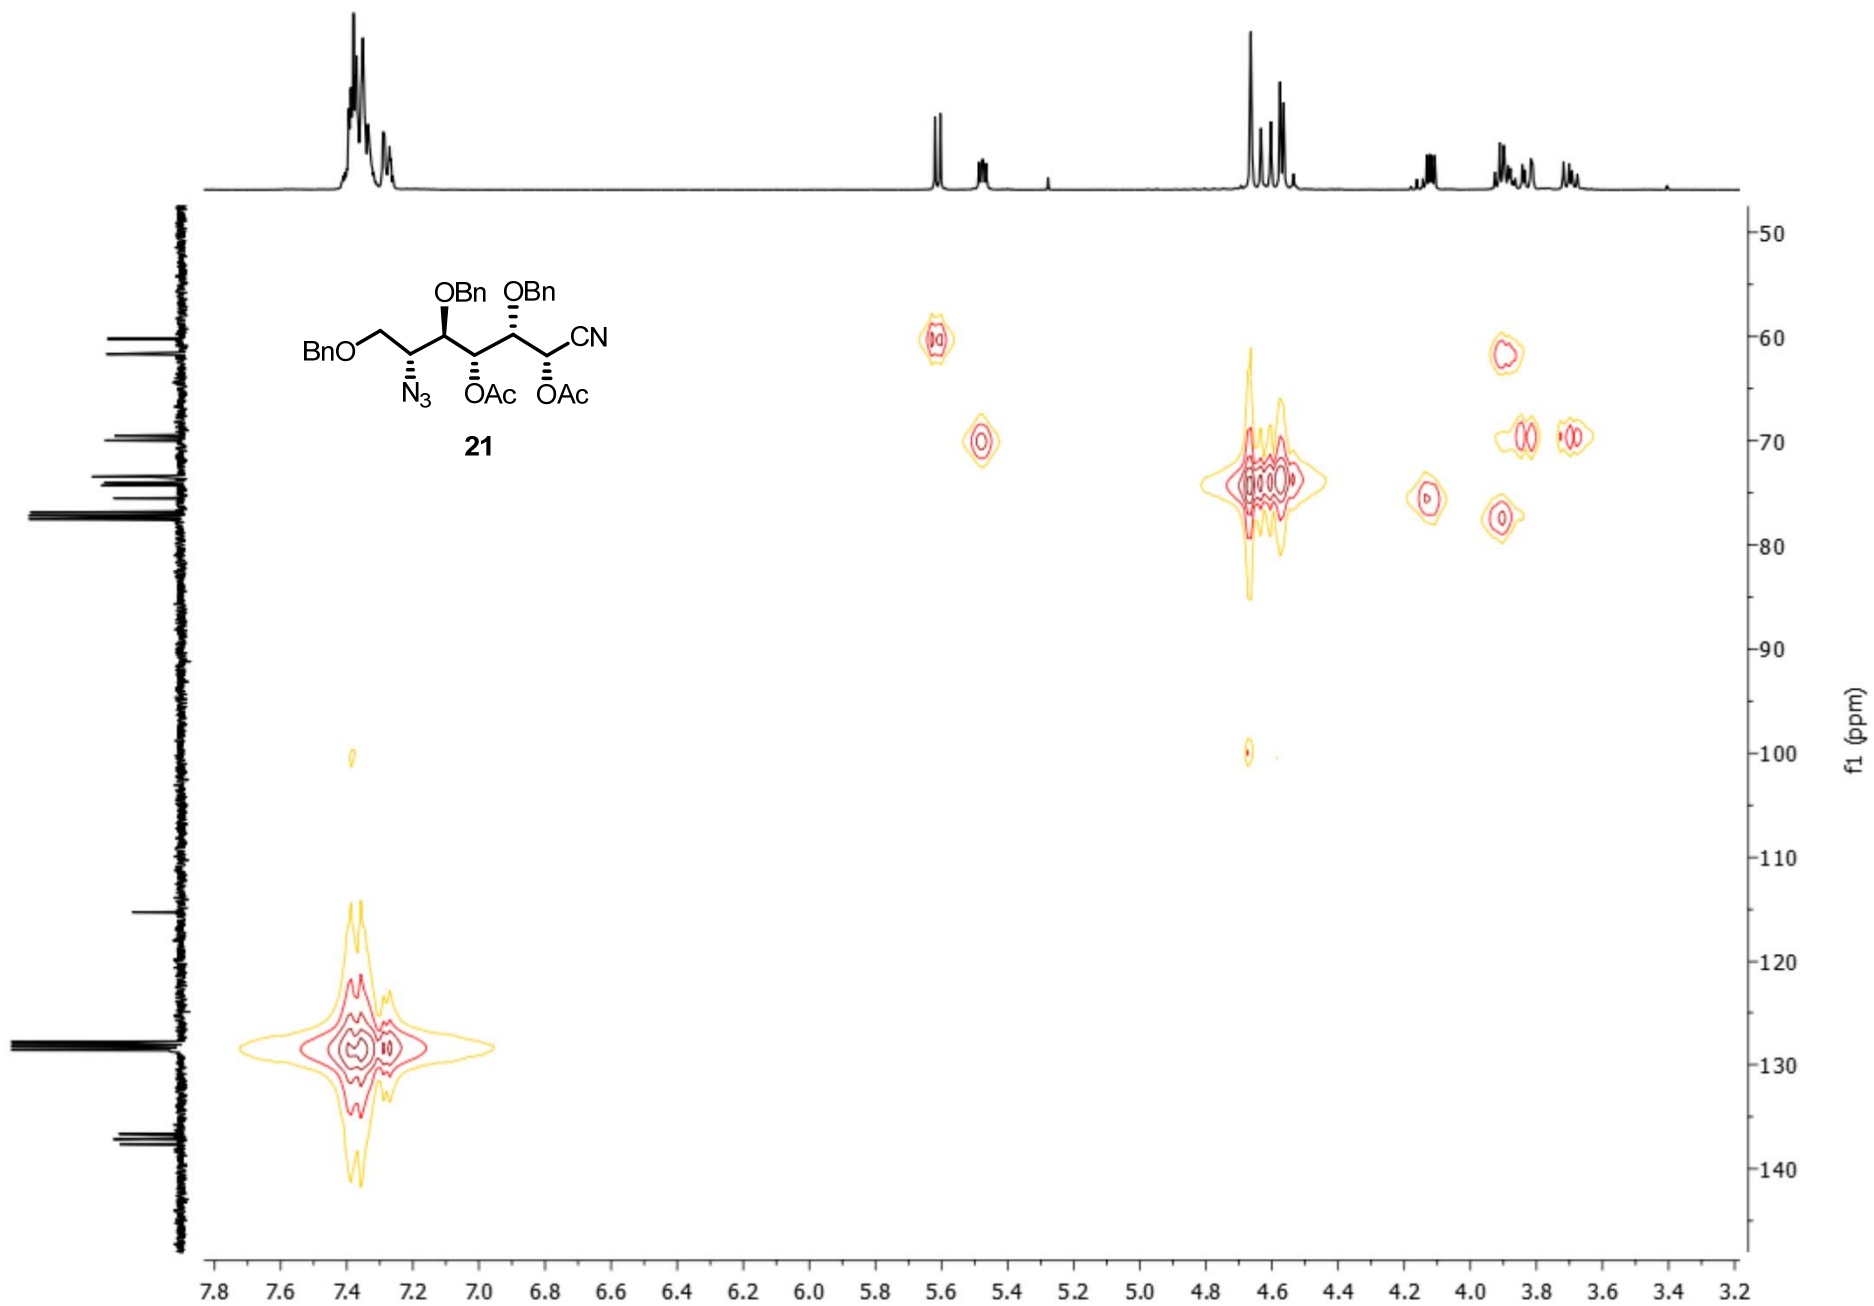

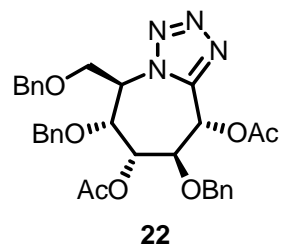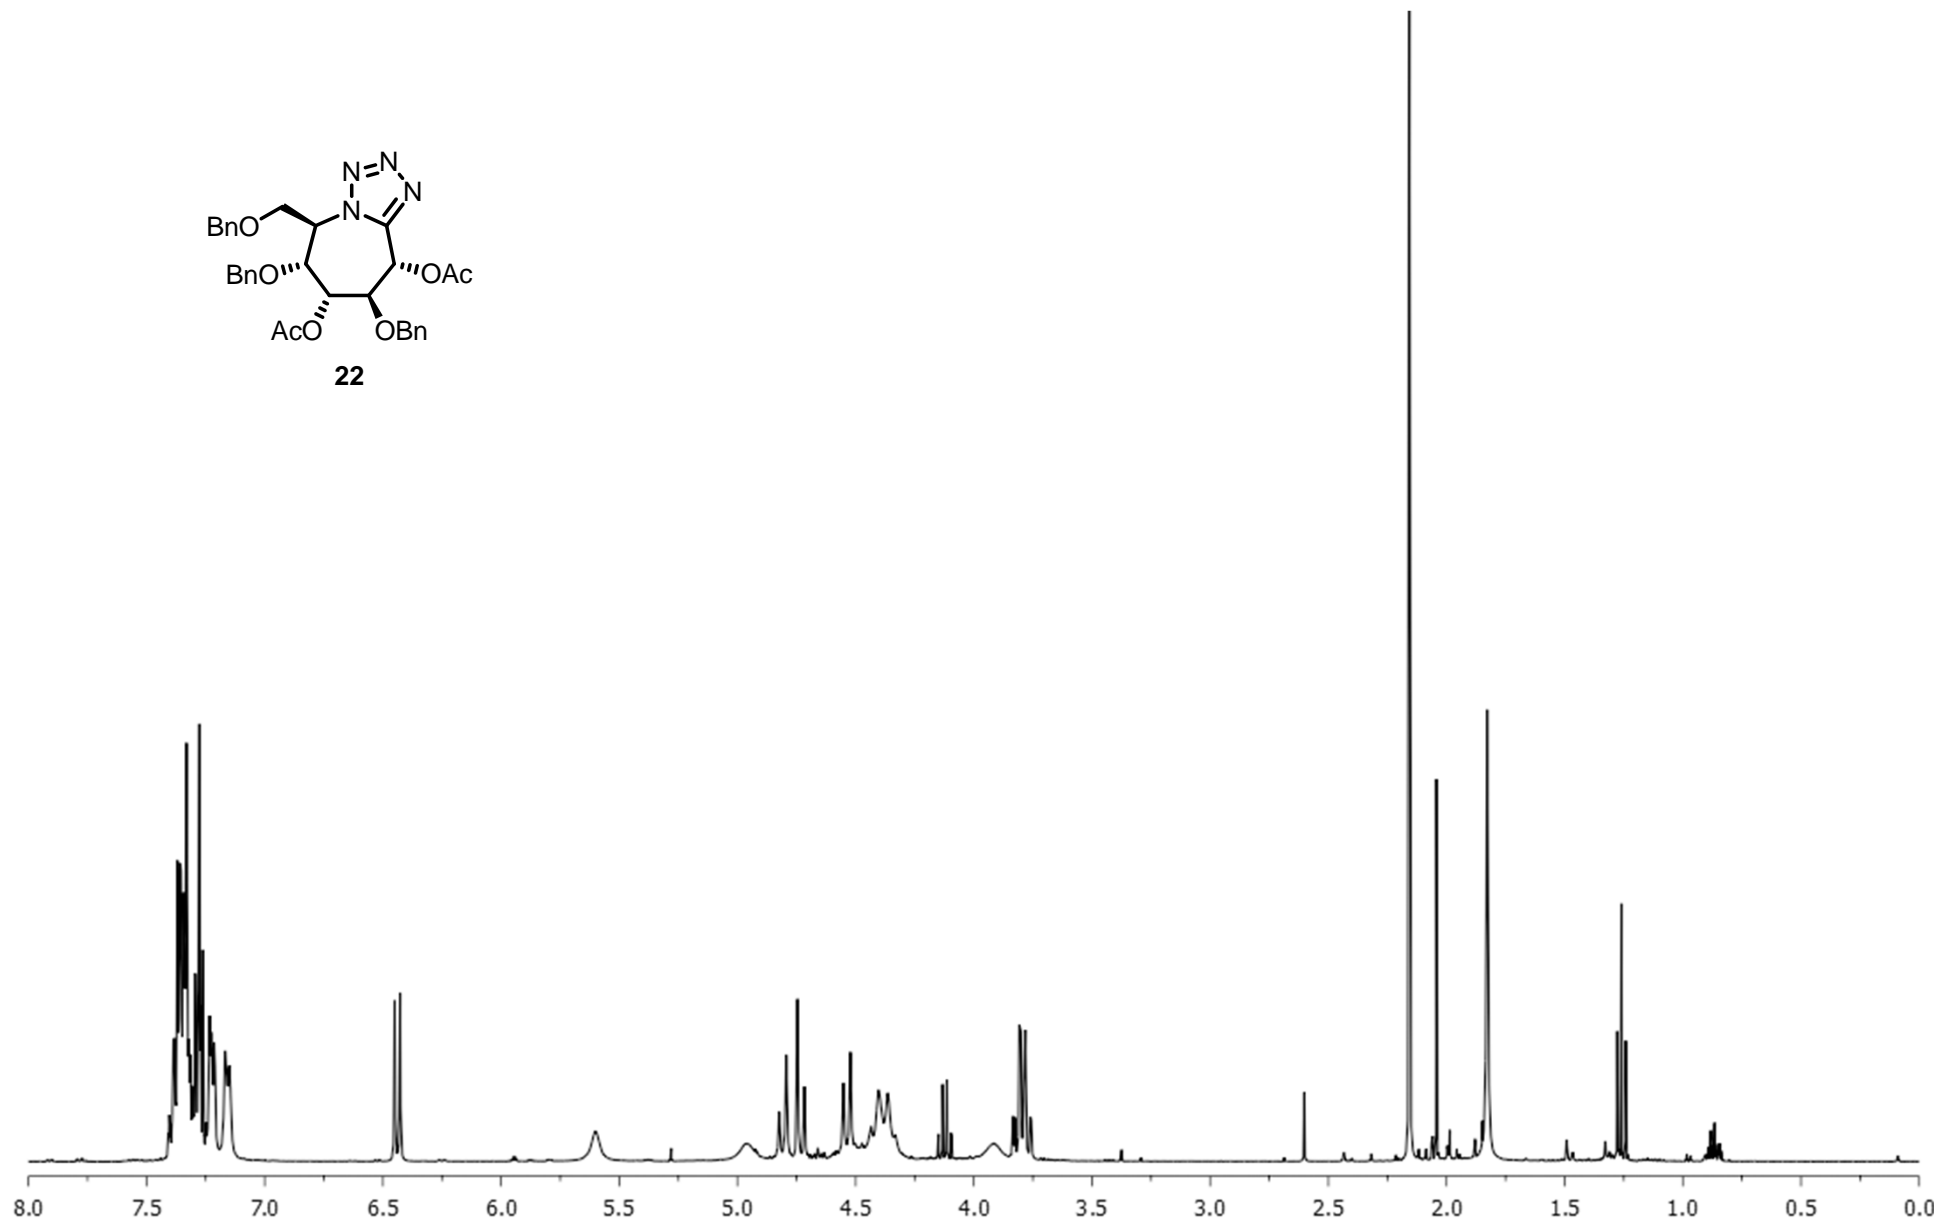

$^1\text{H}$ -RMN ( $\text{CDCl}_3$ , 400 Hz,  $\delta$  ppm)



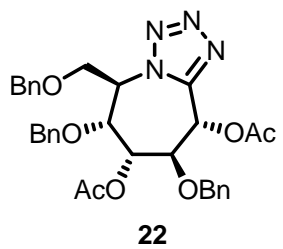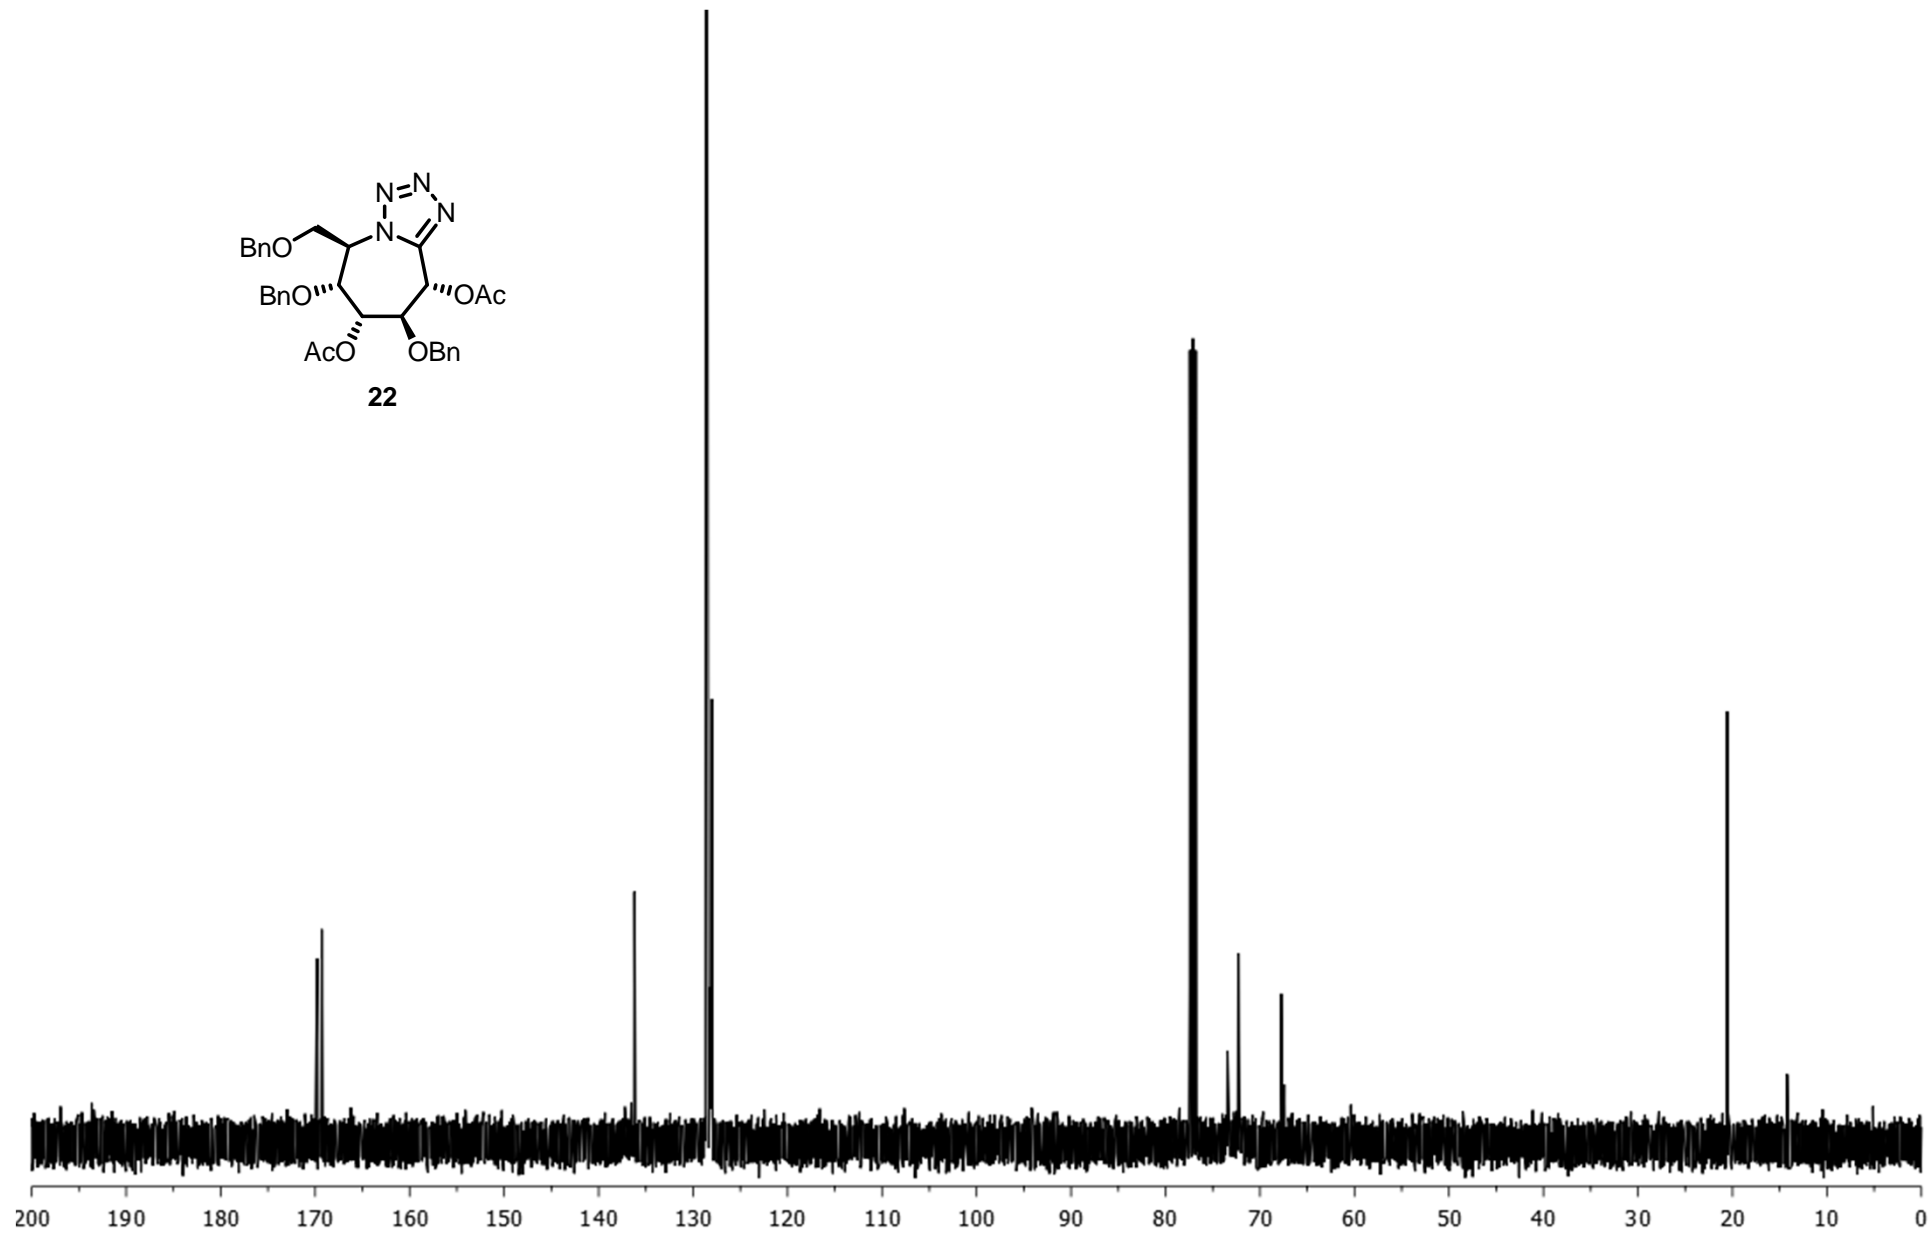

$^{13}\text{C}$ -RMN ( $\text{CDCl}_3$ , 100 MHz,  $\delta$  ppm)

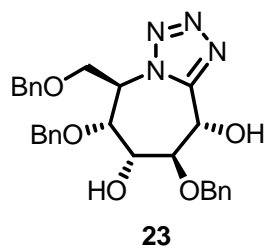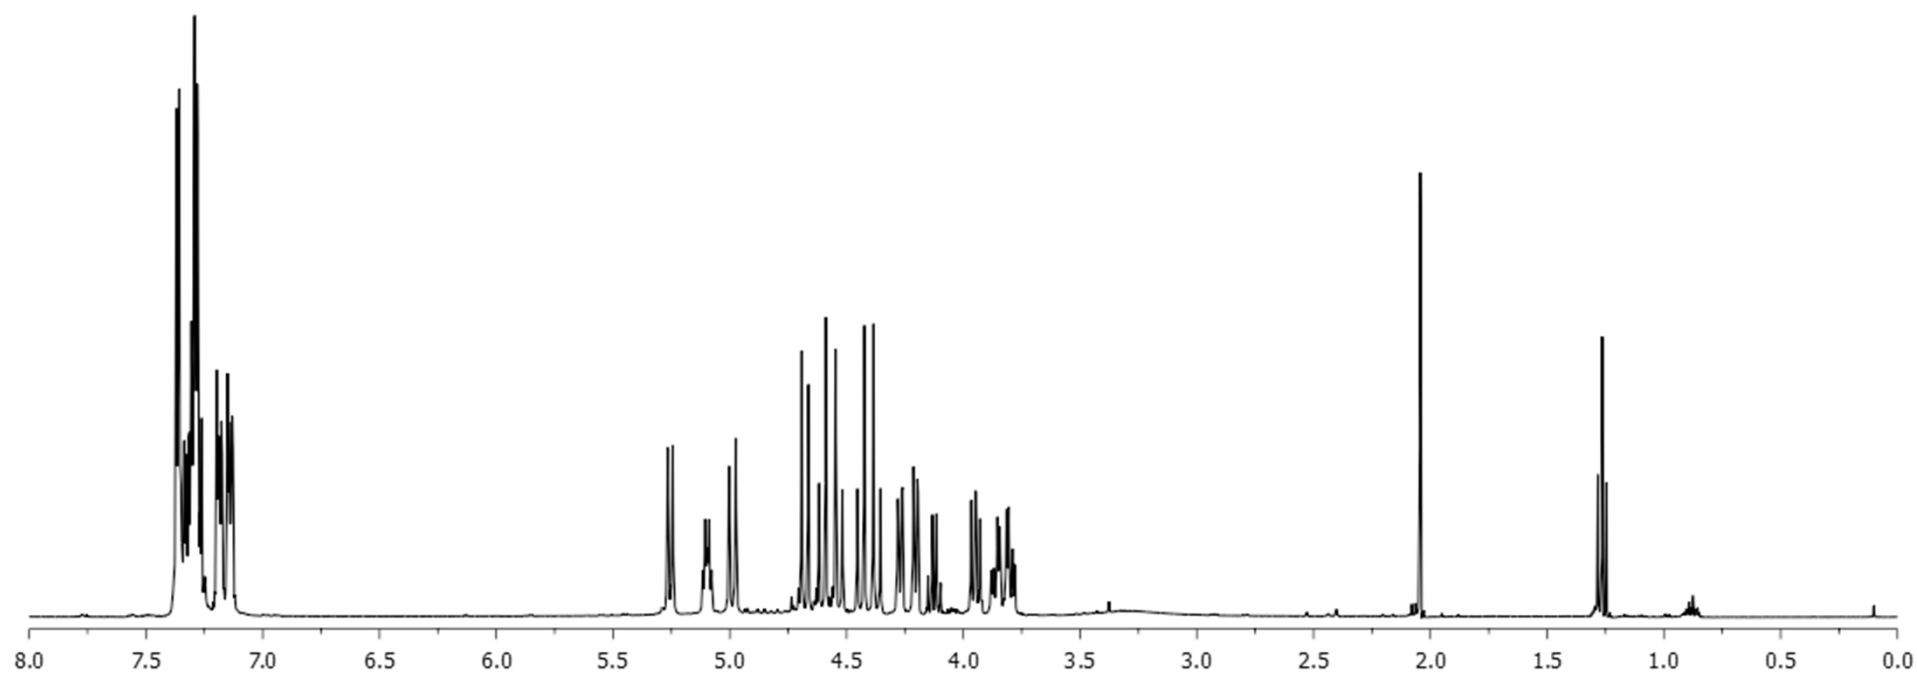

<sup>1</sup>H-RMN (CDCl<sub>3</sub>, 400 MHz, δ ppm)

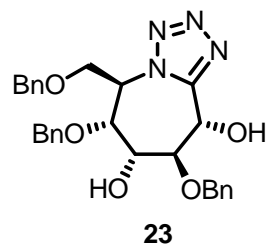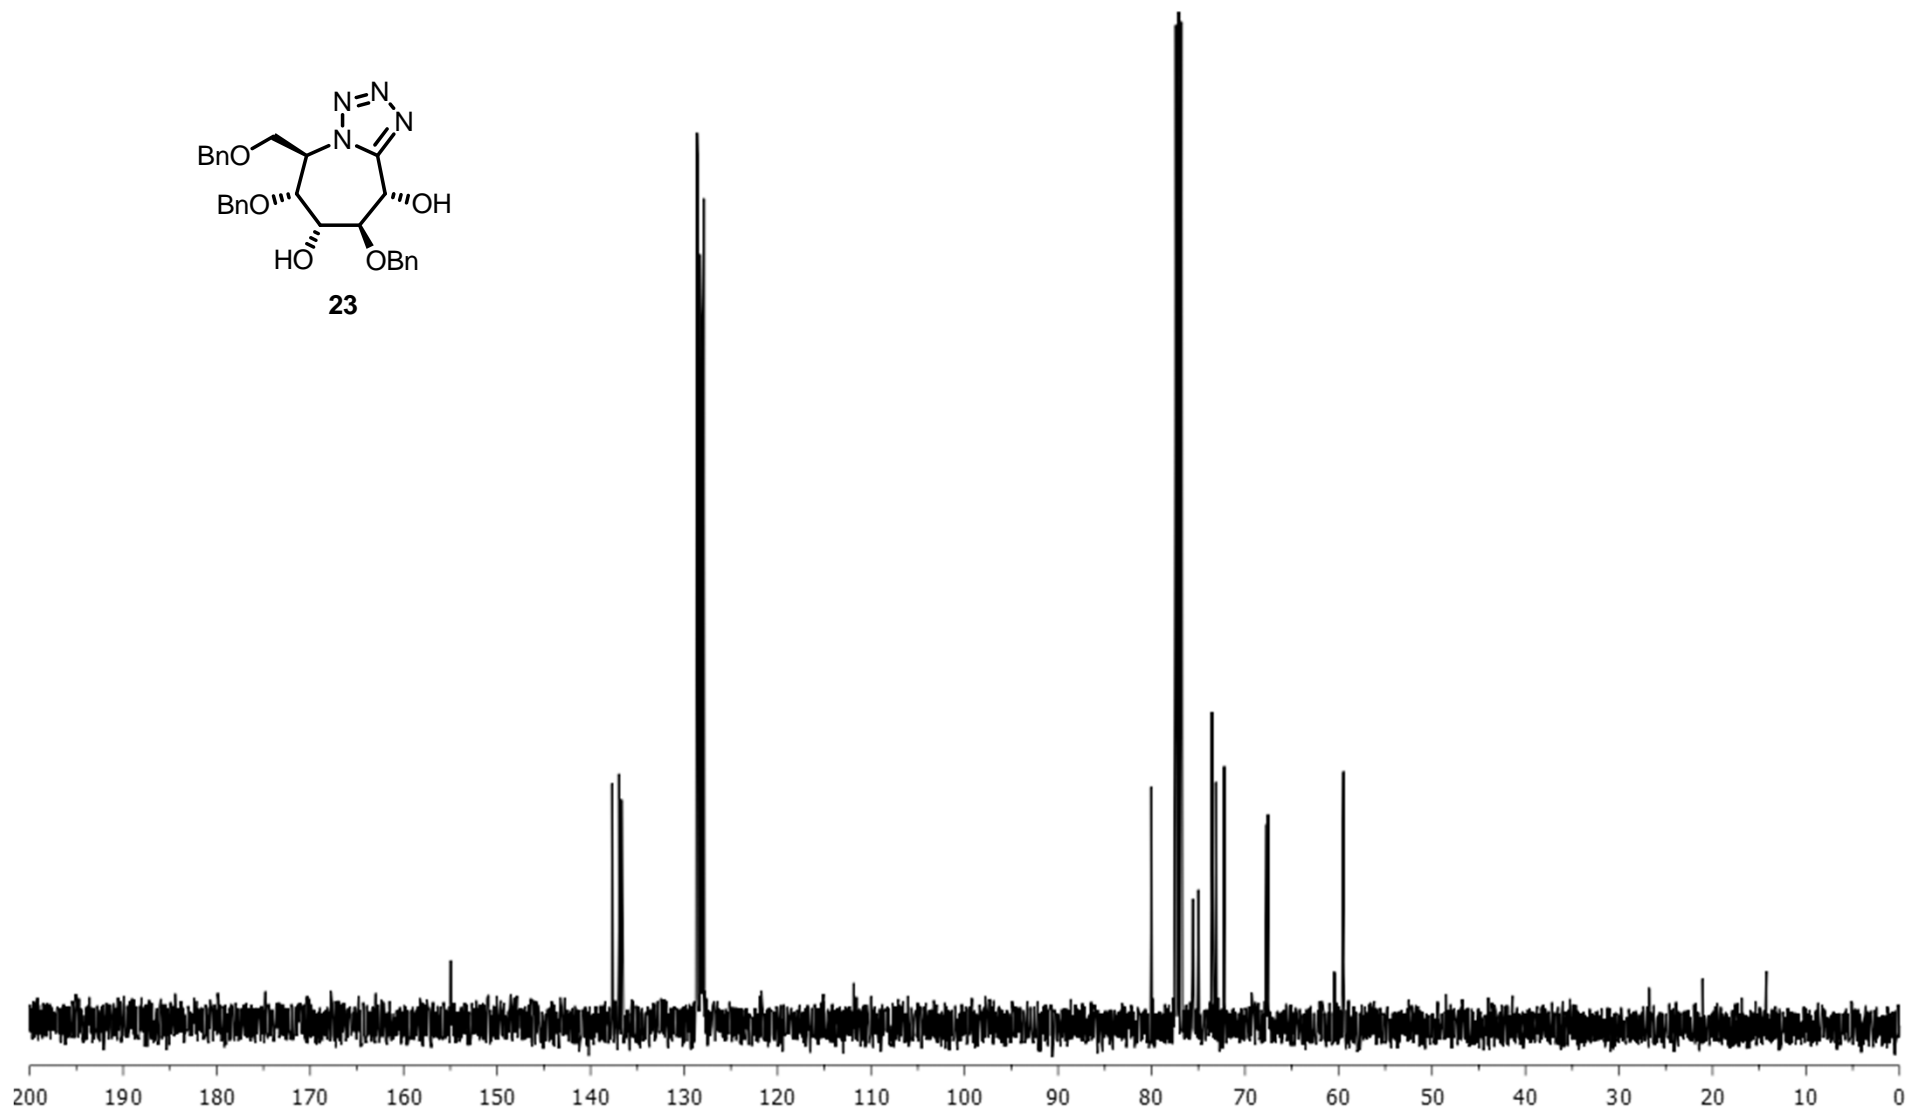

$^{13}\text{C}$ -RMN ( $\text{CDCl}_3$ , 100 MHz,  $\delta$  ppm)

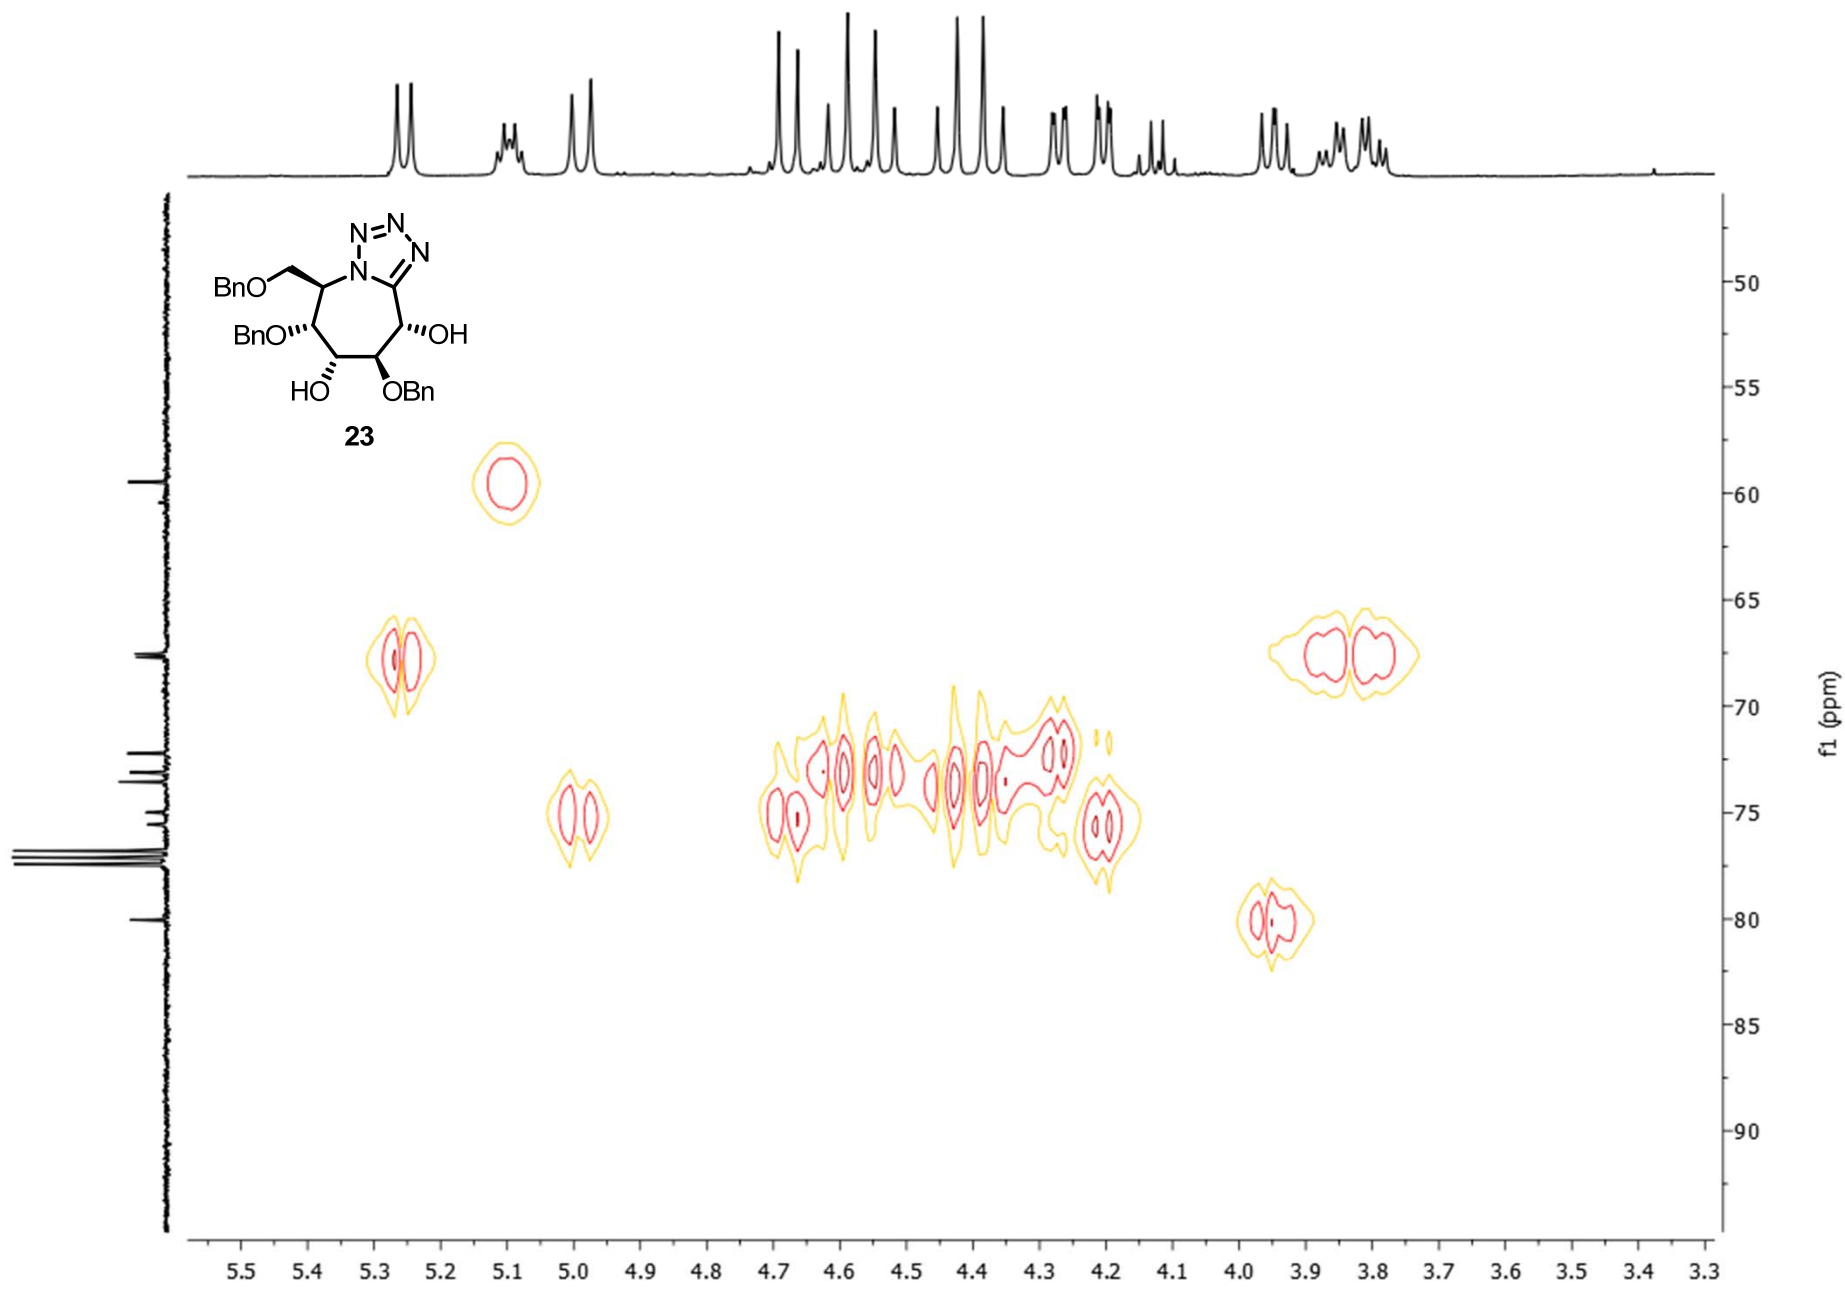

$^1\text{H}$ -RMN ( $\text{CDCl}_3$ , 400 MHz,  $\delta$  ppm)

$^{13}\text{C}$ -RMN ( $\text{CDCl}_3$ , 100 MHz,  $\delta$  ppm)

HMQC

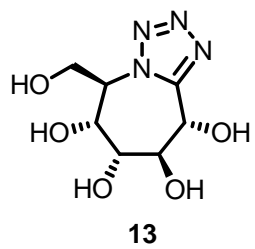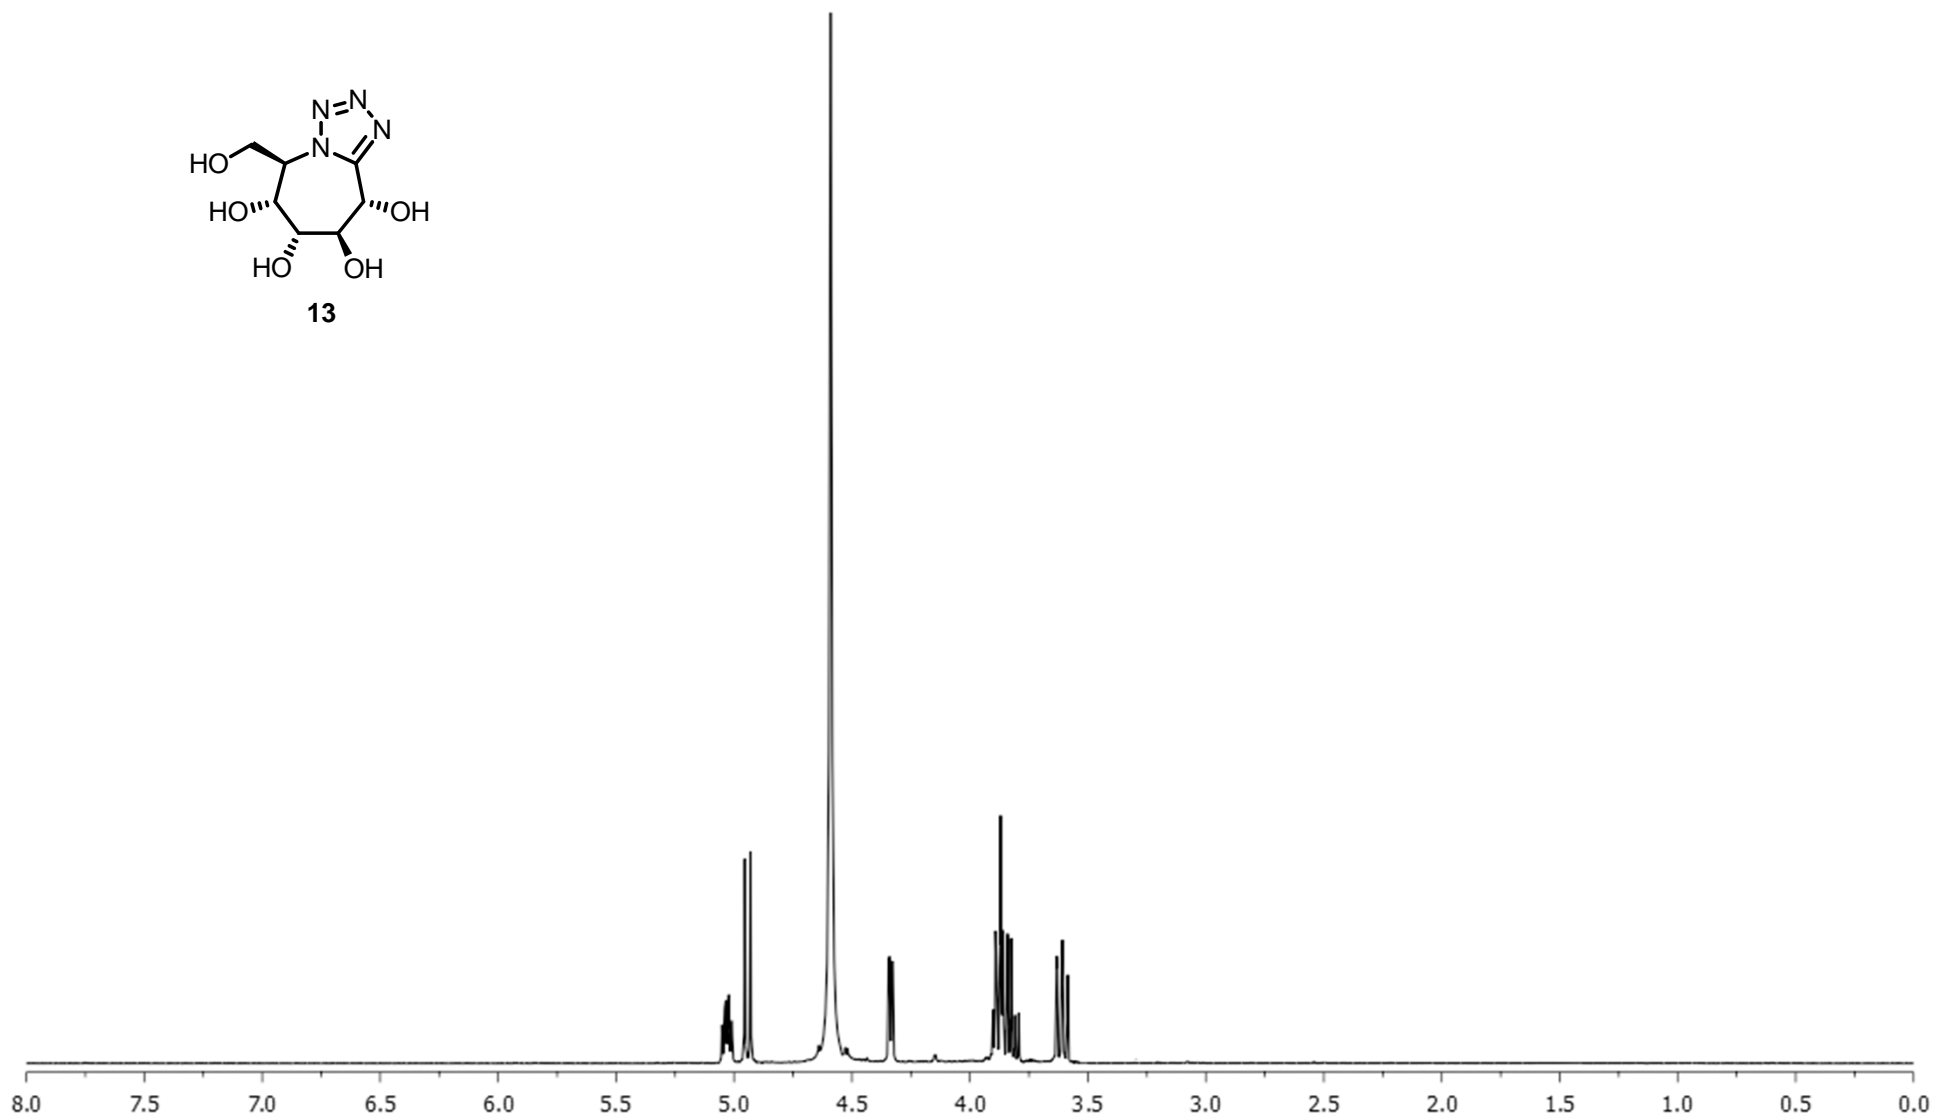

<sup>1</sup>H-RMN (D<sub>2</sub>O, 400 MHz, δ ppm)

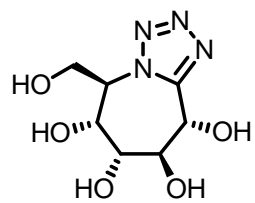

13

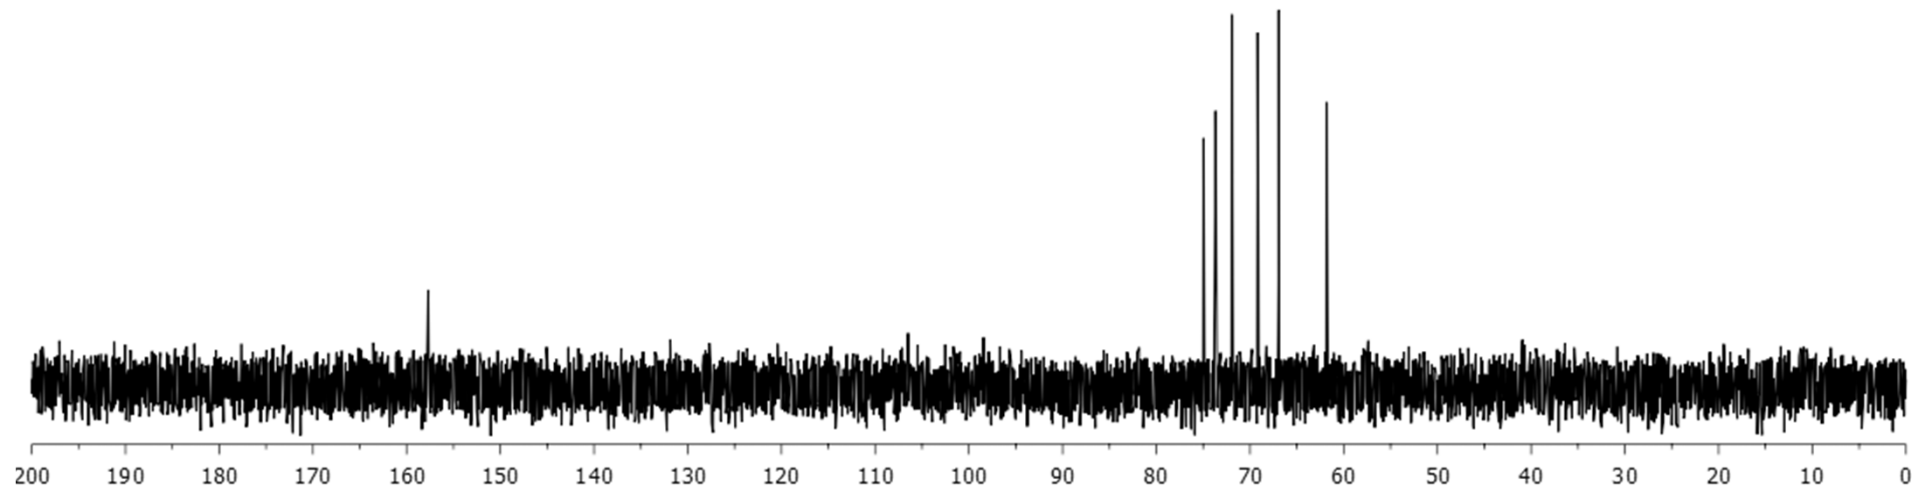

$^{13}\text{C}$ -RMN ( $\text{D}_2\text{O}$ , 100 MHz,  $\delta$  pm)

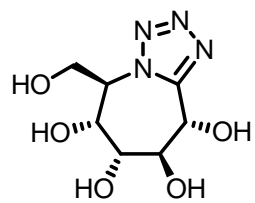

13

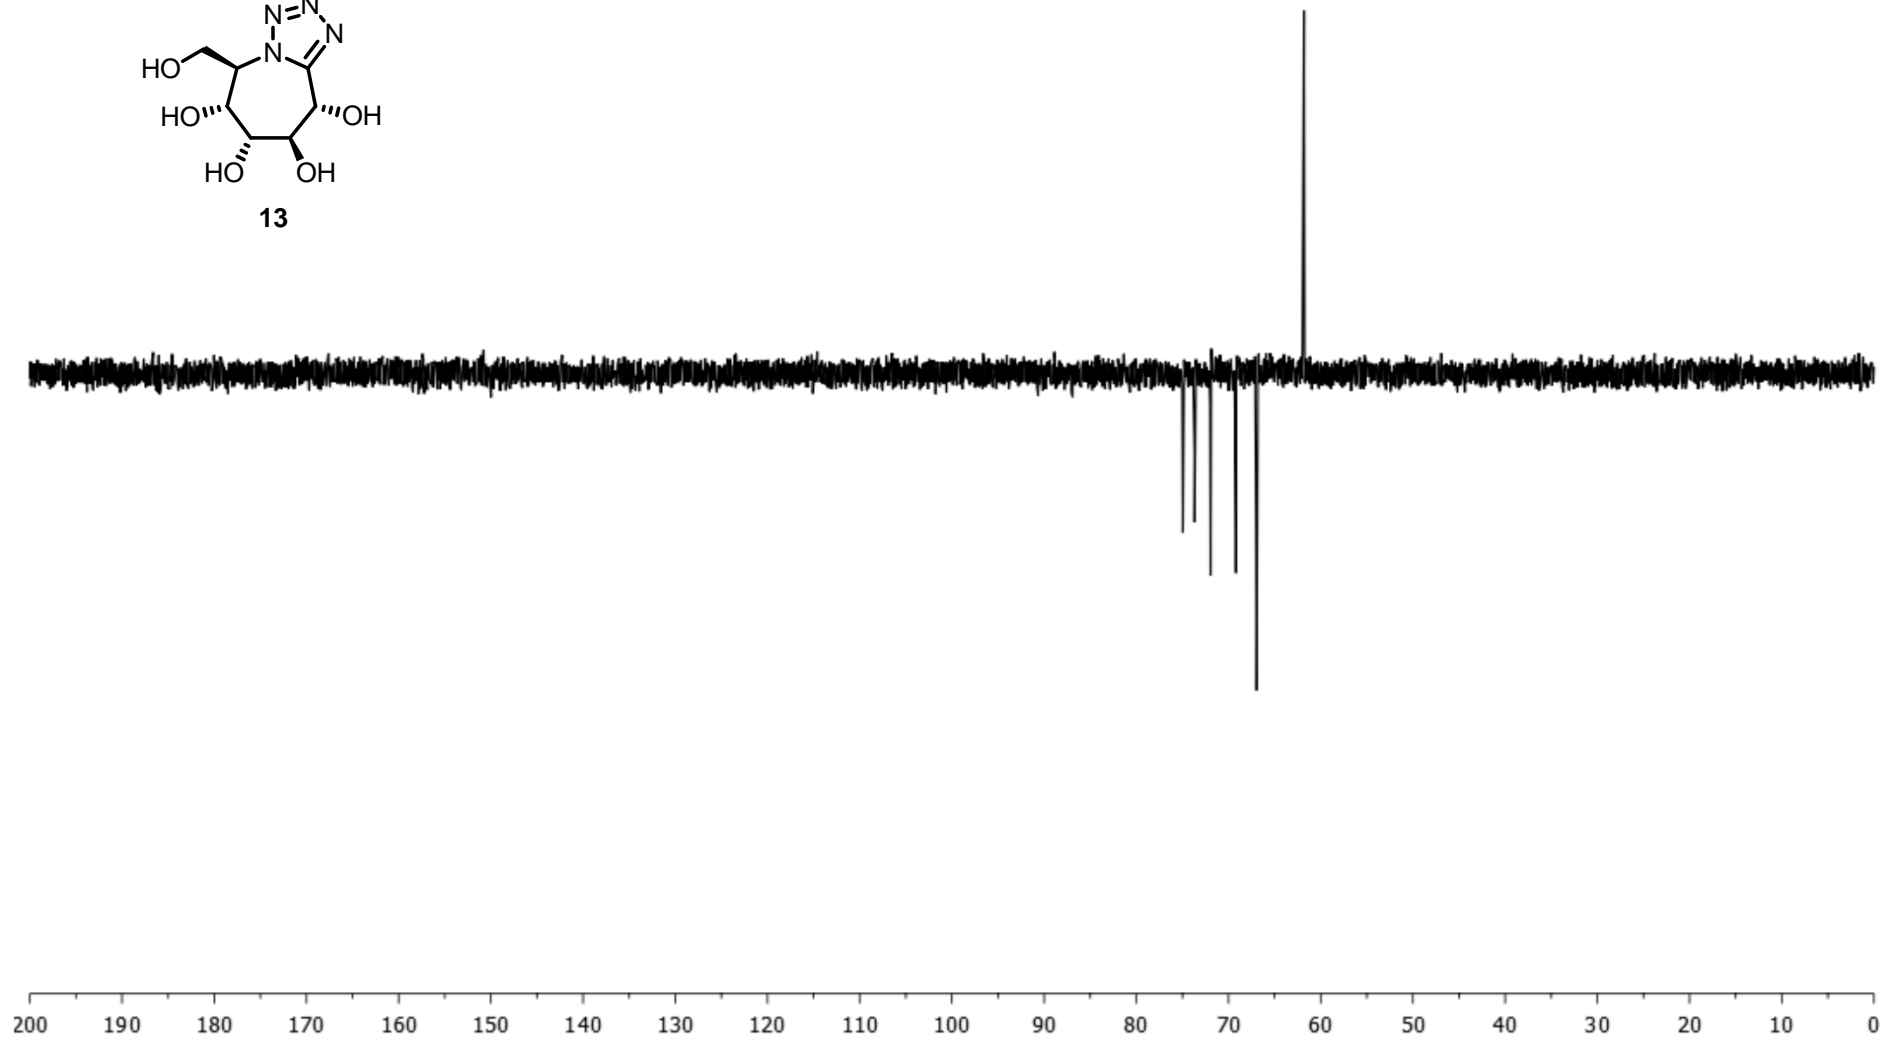

$^{13}\text{C}$ -RMN ( $\text{D}_2\text{O}$ , 100 MHz,  $\delta$  ppm) DEPT

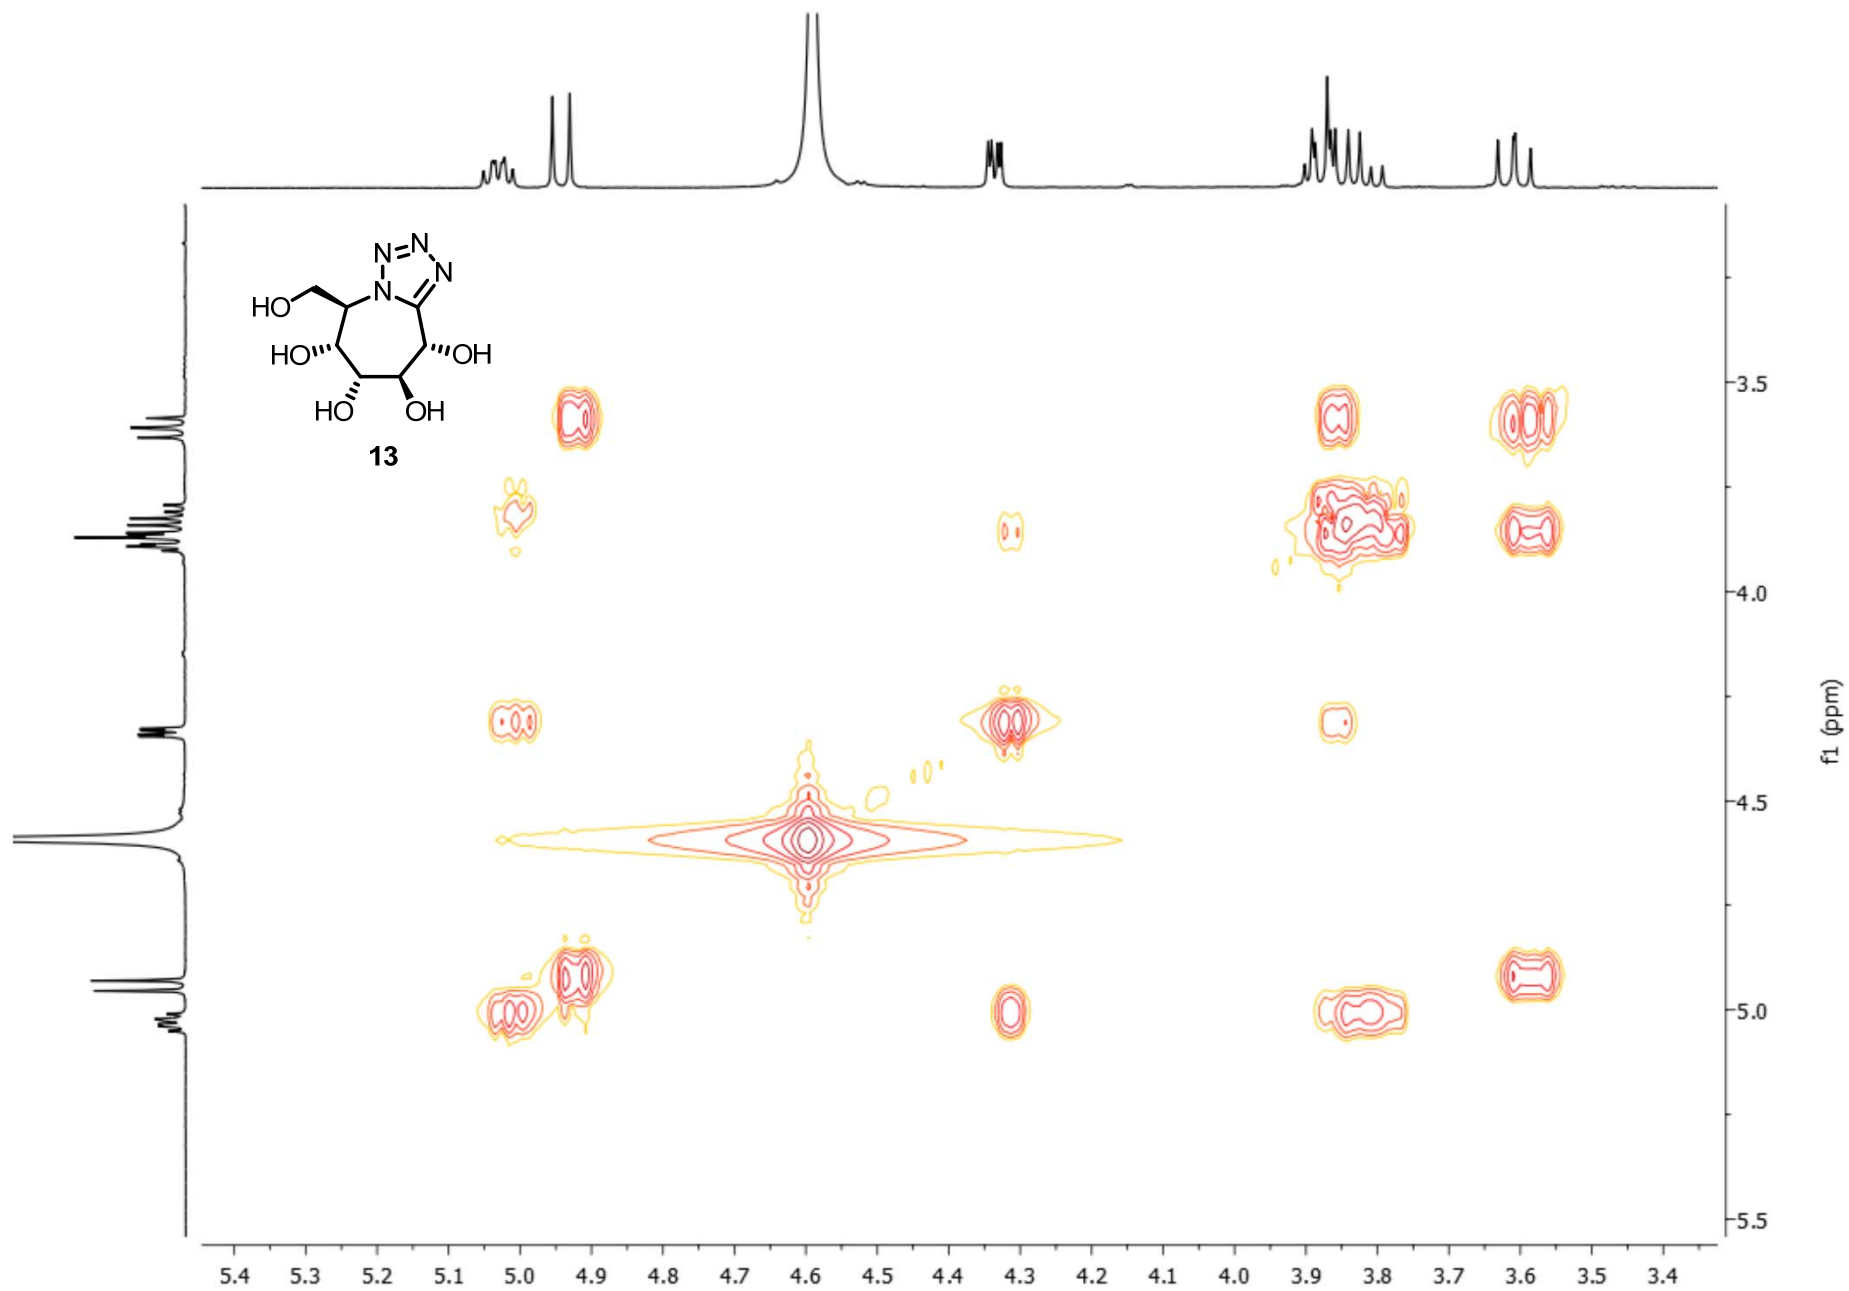

$^1\text{H-NMR}$  ( $\text{D}_2\text{O}$  400 MHz,  $\delta$  ppm) COSY



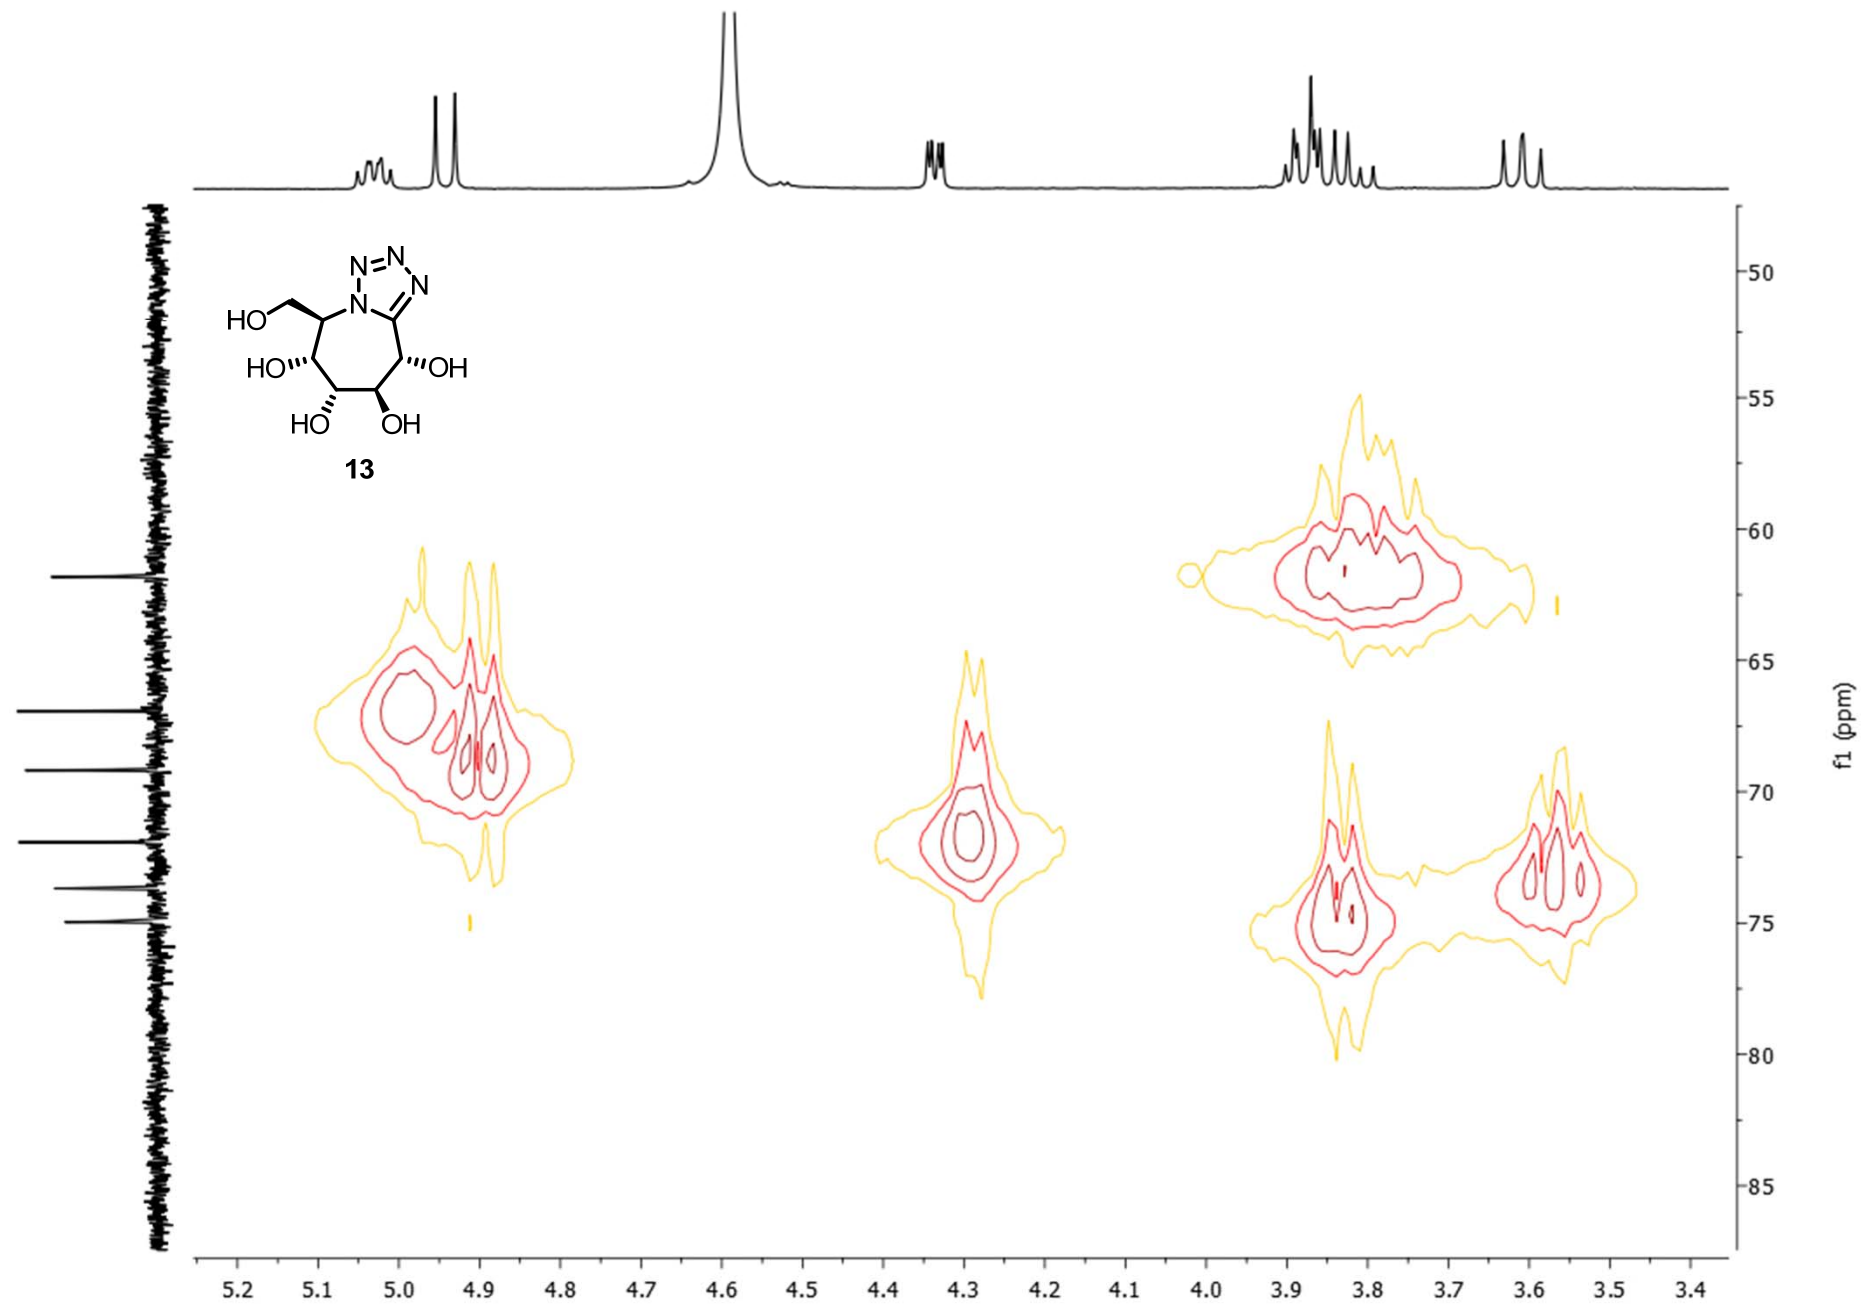

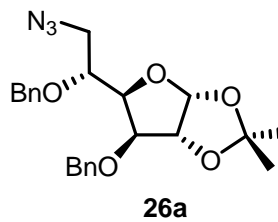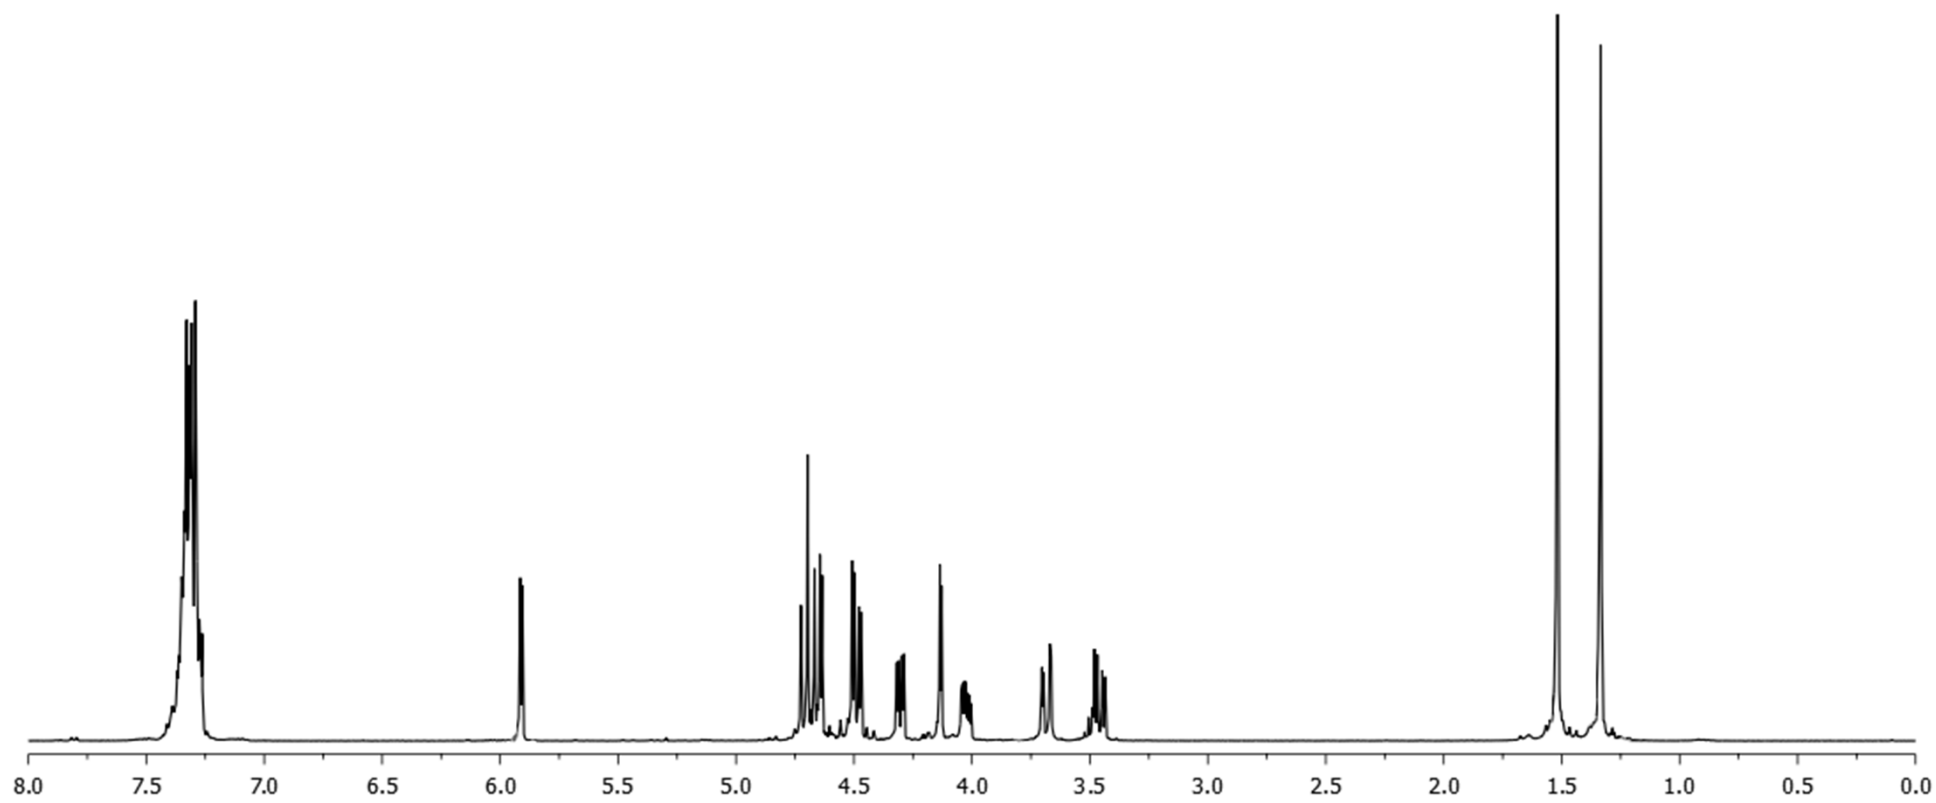

<sup>1</sup>H-RMN (CDCl<sub>3</sub>, 400 MHz, δ ppm)

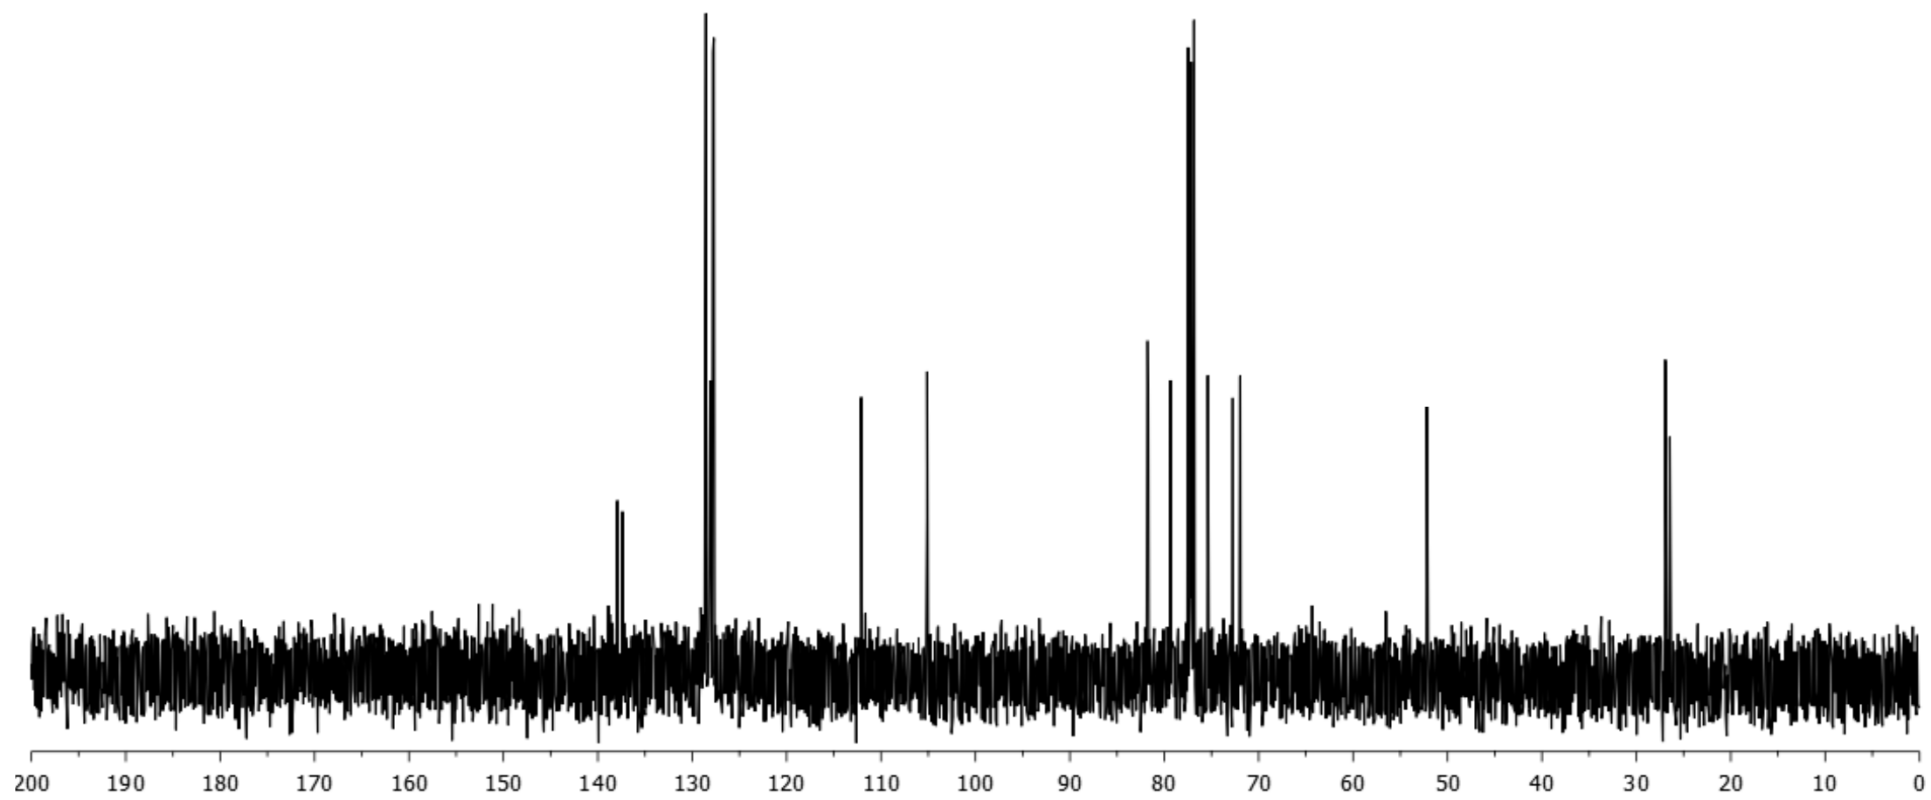

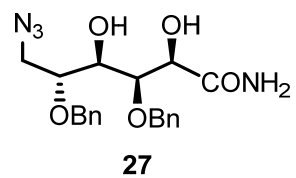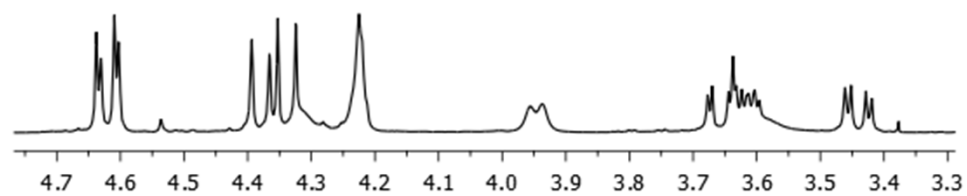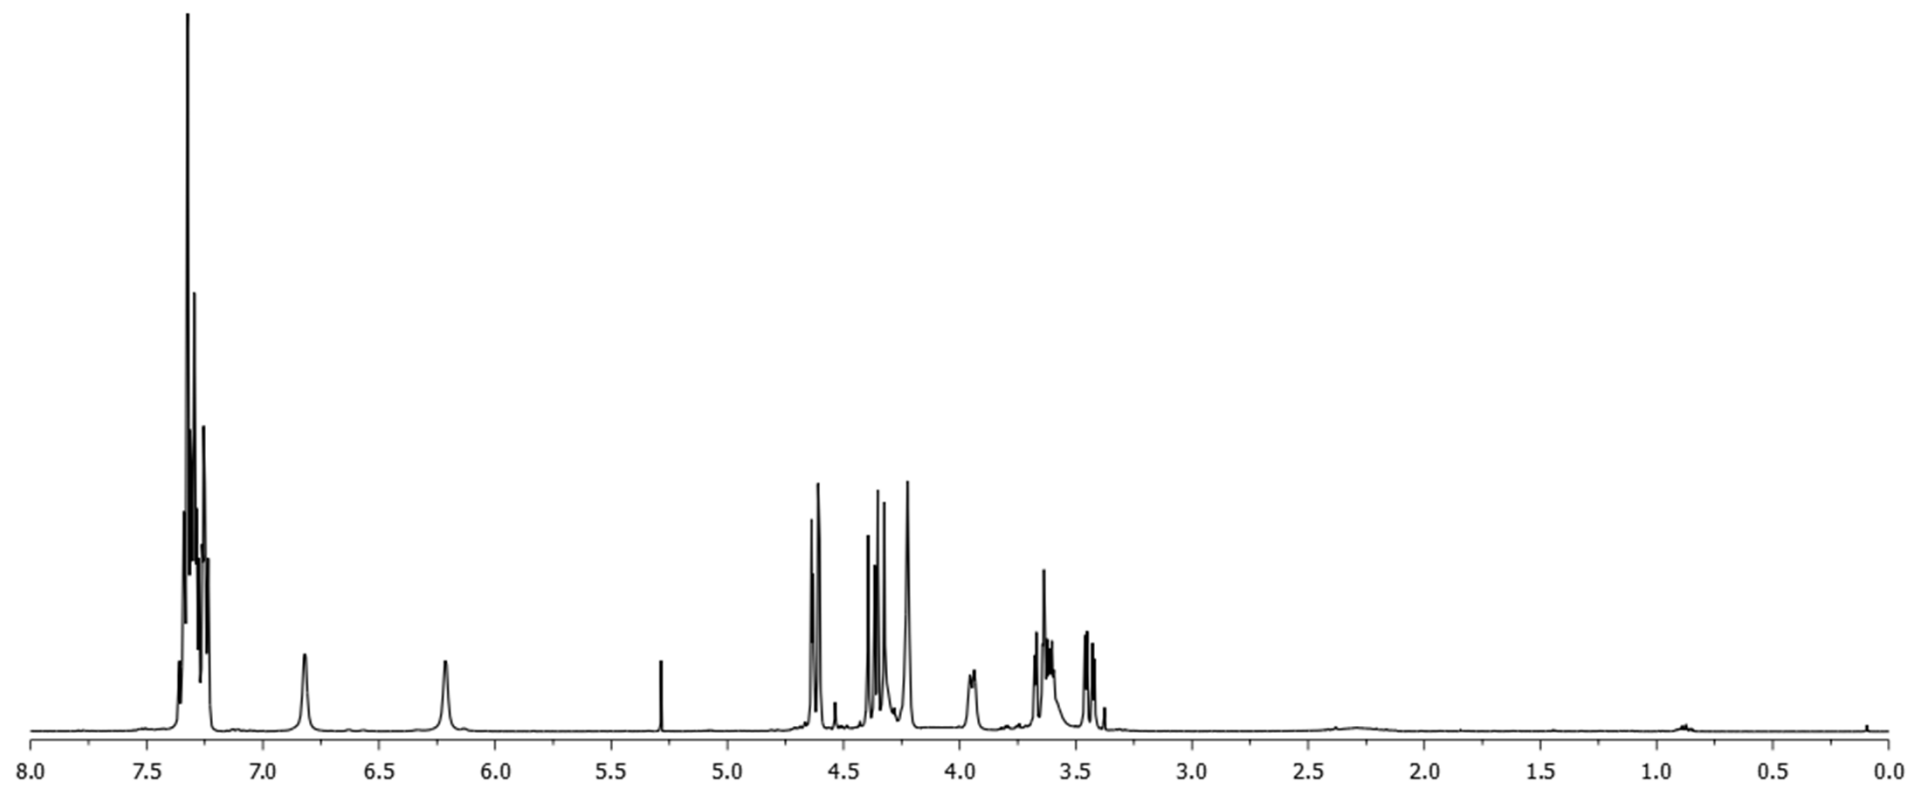

$^1\text{H-NMR}$  ( $\text{CDCl}_3$ , 400 MHz,  $\delta$  ppm)

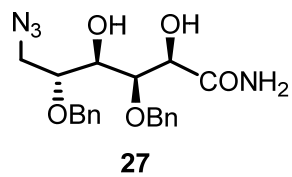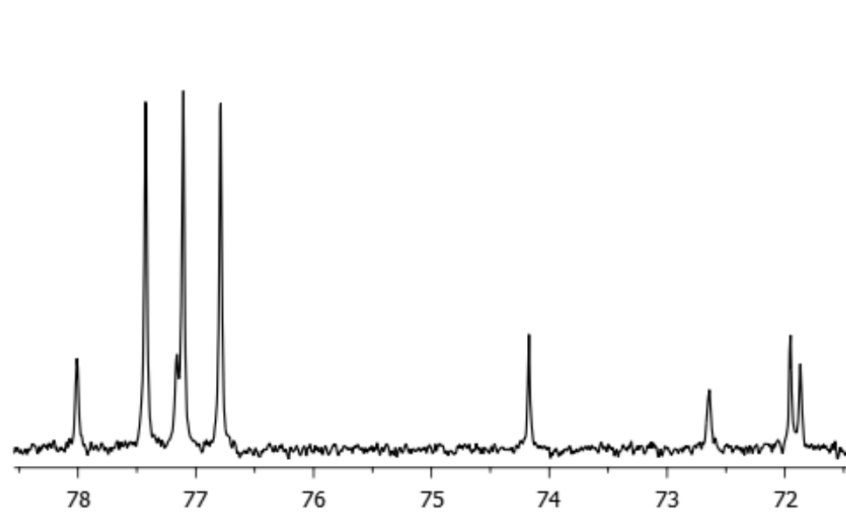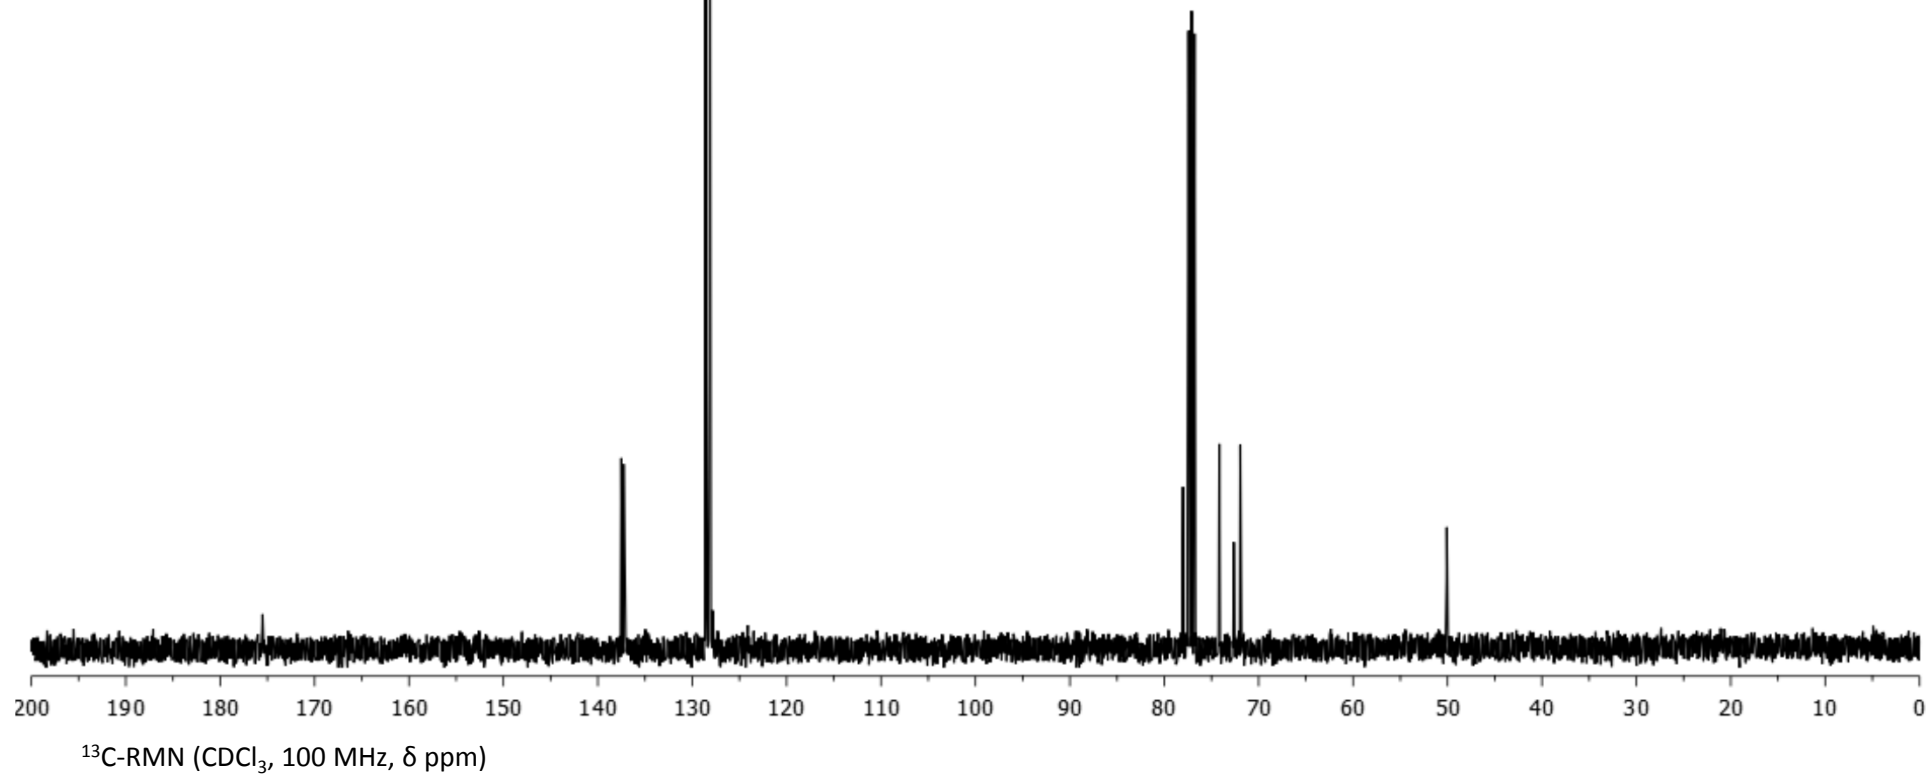

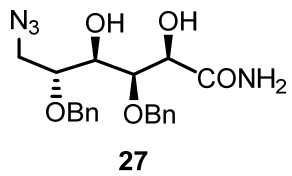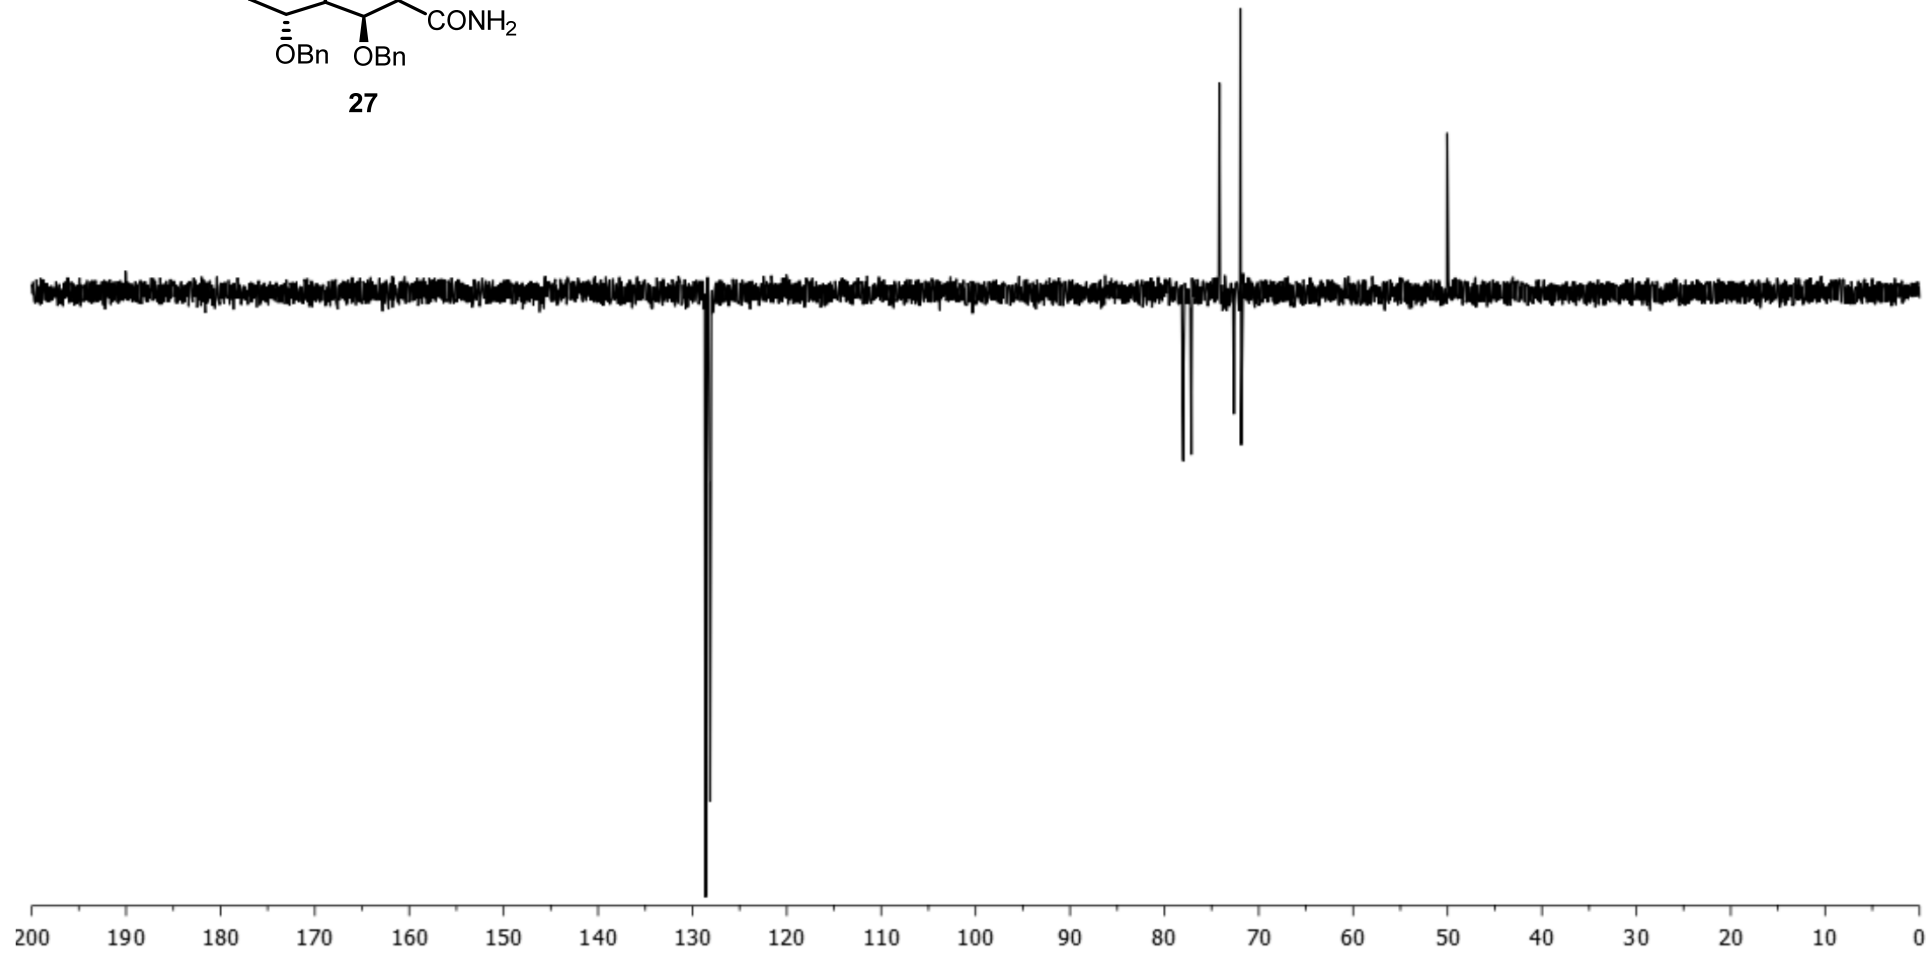

<sup>13</sup>C-RMN (CDCl<sub>3</sub>, 100 MHz, δ ppm) DEPT

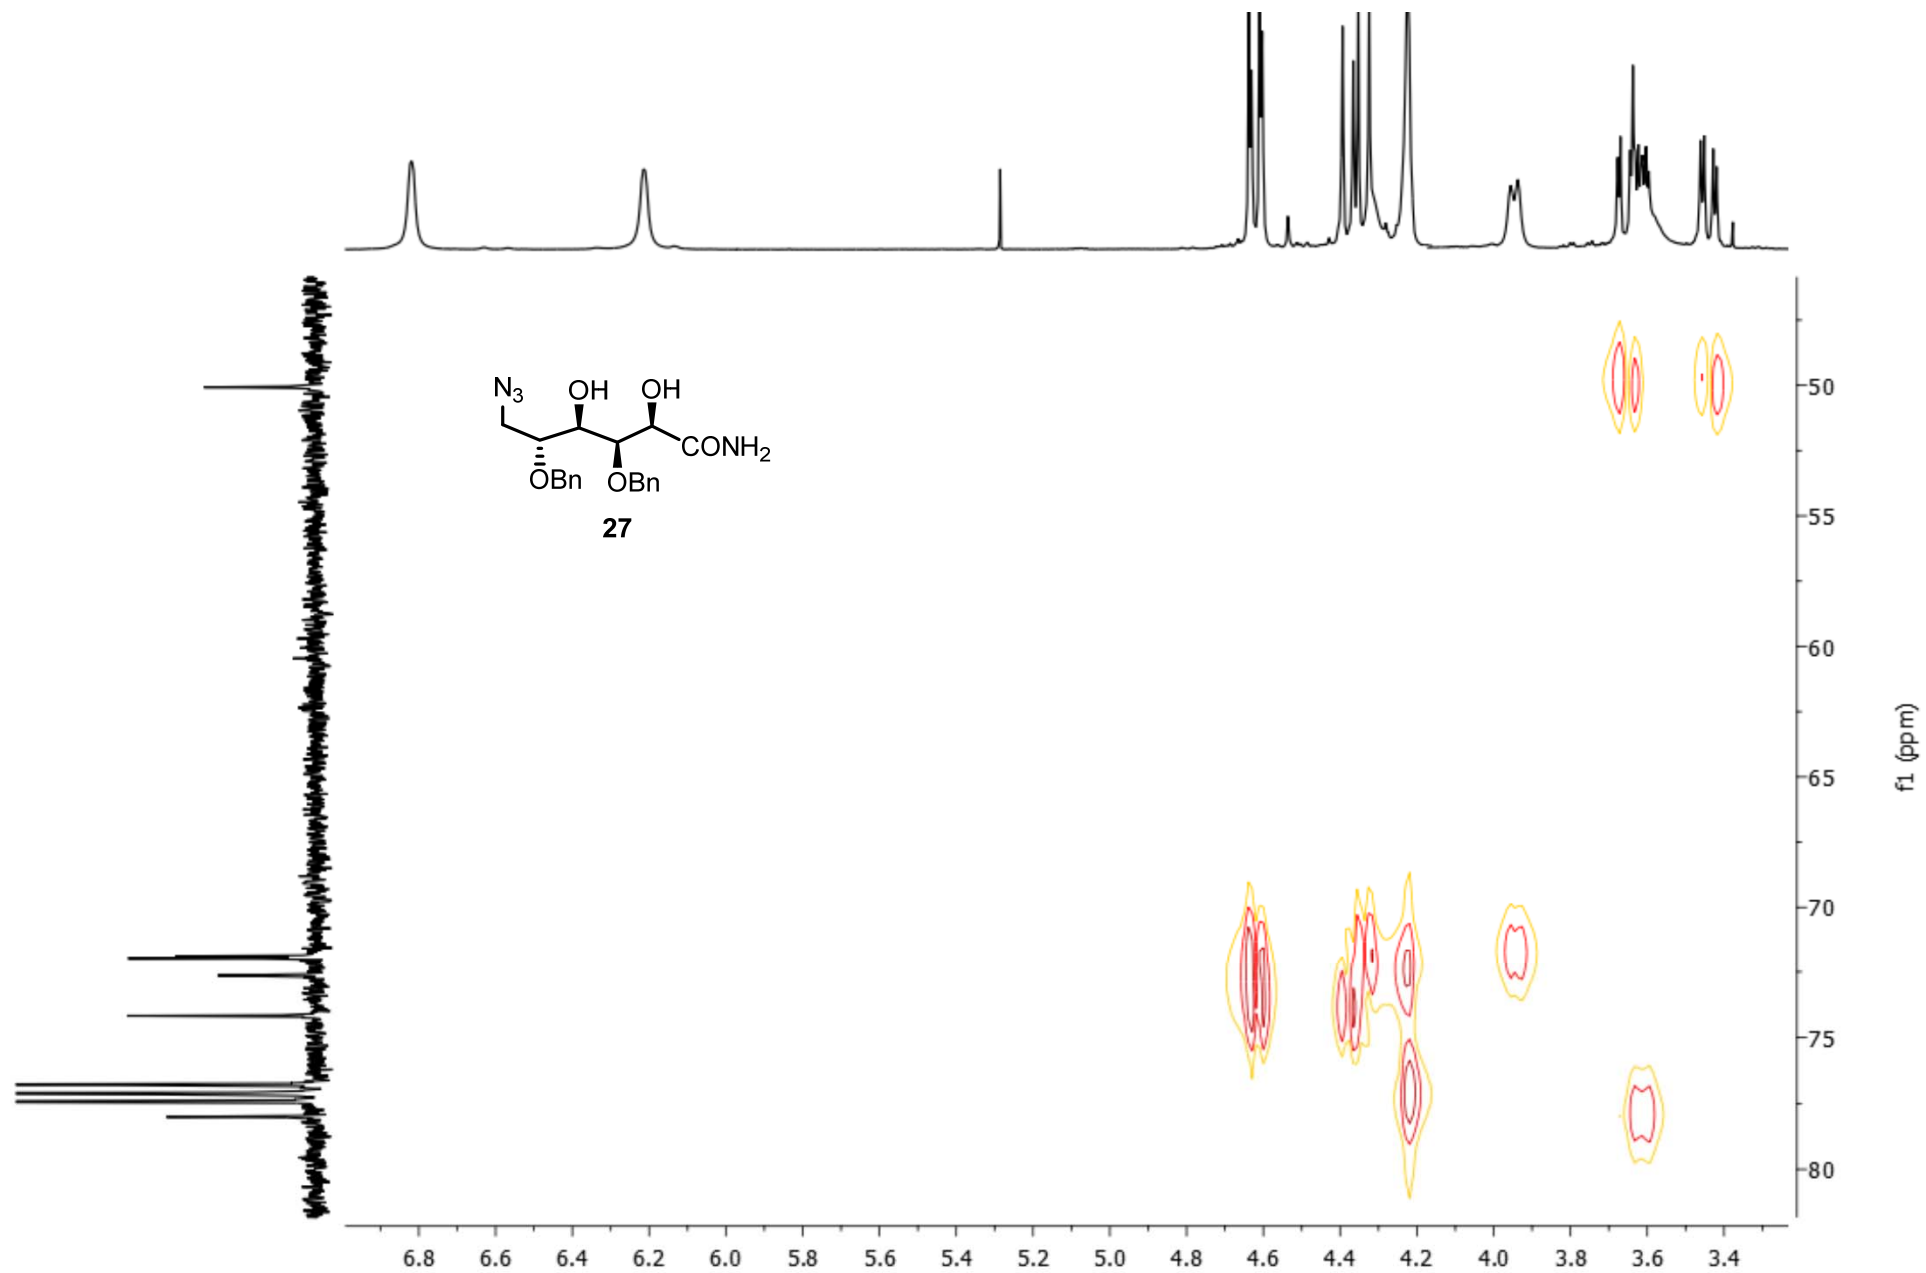

$^1\text{H}$ -RMN ( $\text{CDCl}_3$ , 400 MHz,  $\delta$  ppm)

$^{13}\text{C}$ -RMN ( $\text{CDCl}_3$ , 100 MHz,  $\delta$  ppm)

HMQC

31

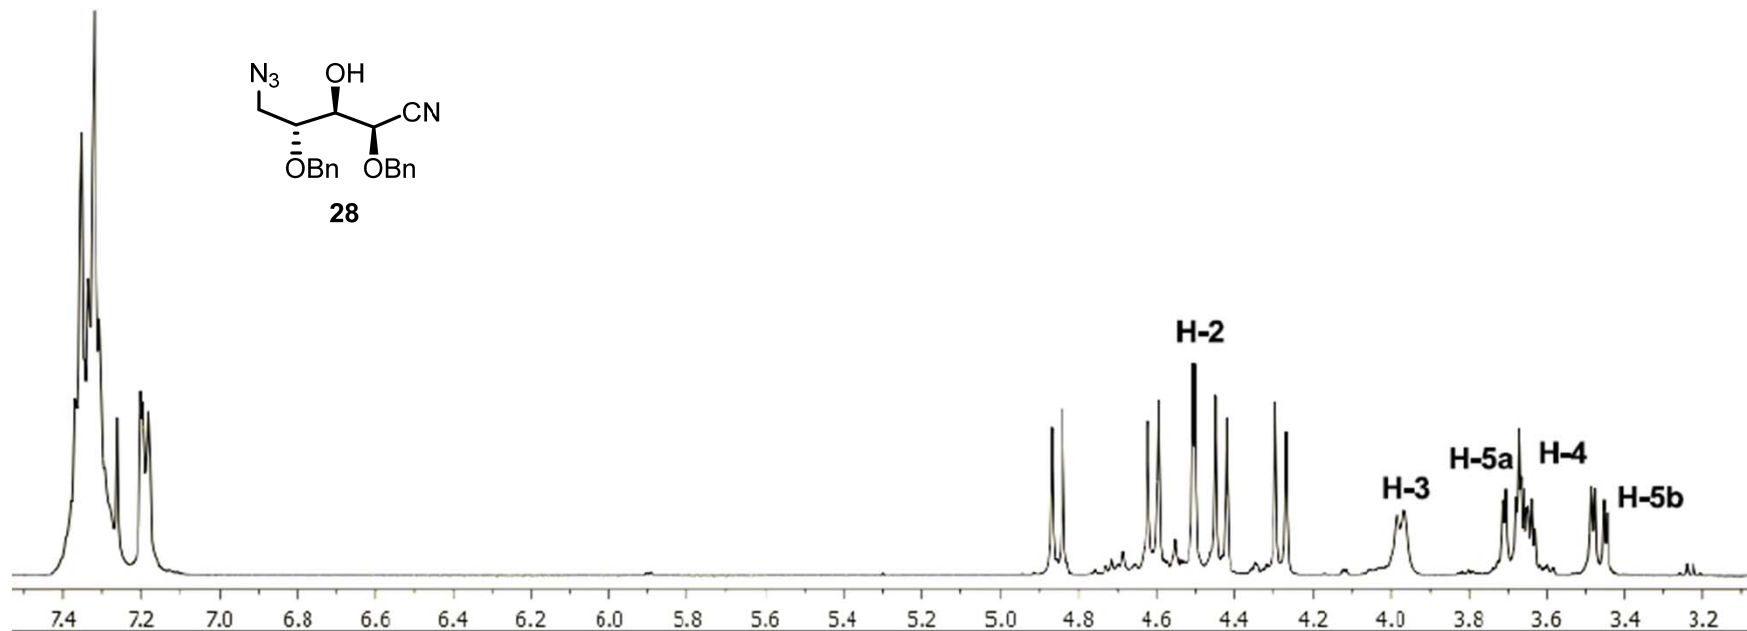

<sup>1</sup>H-RMN (CDCl<sub>3</sub>, 400 MHz, δ ppm)

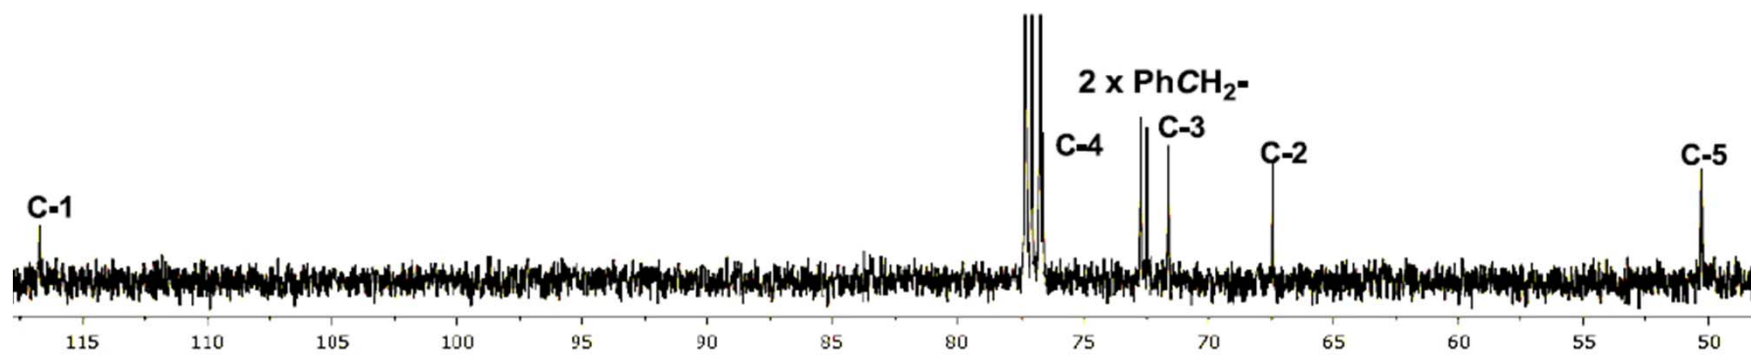

<sup>13</sup>C-RMN (CDCl<sub>3</sub>, 100 MHz, δ ppm)



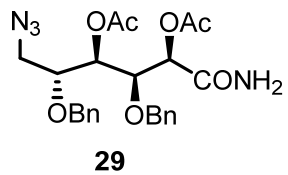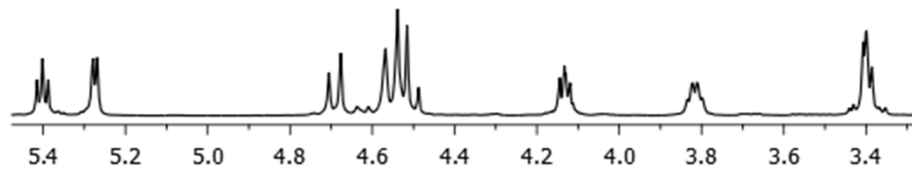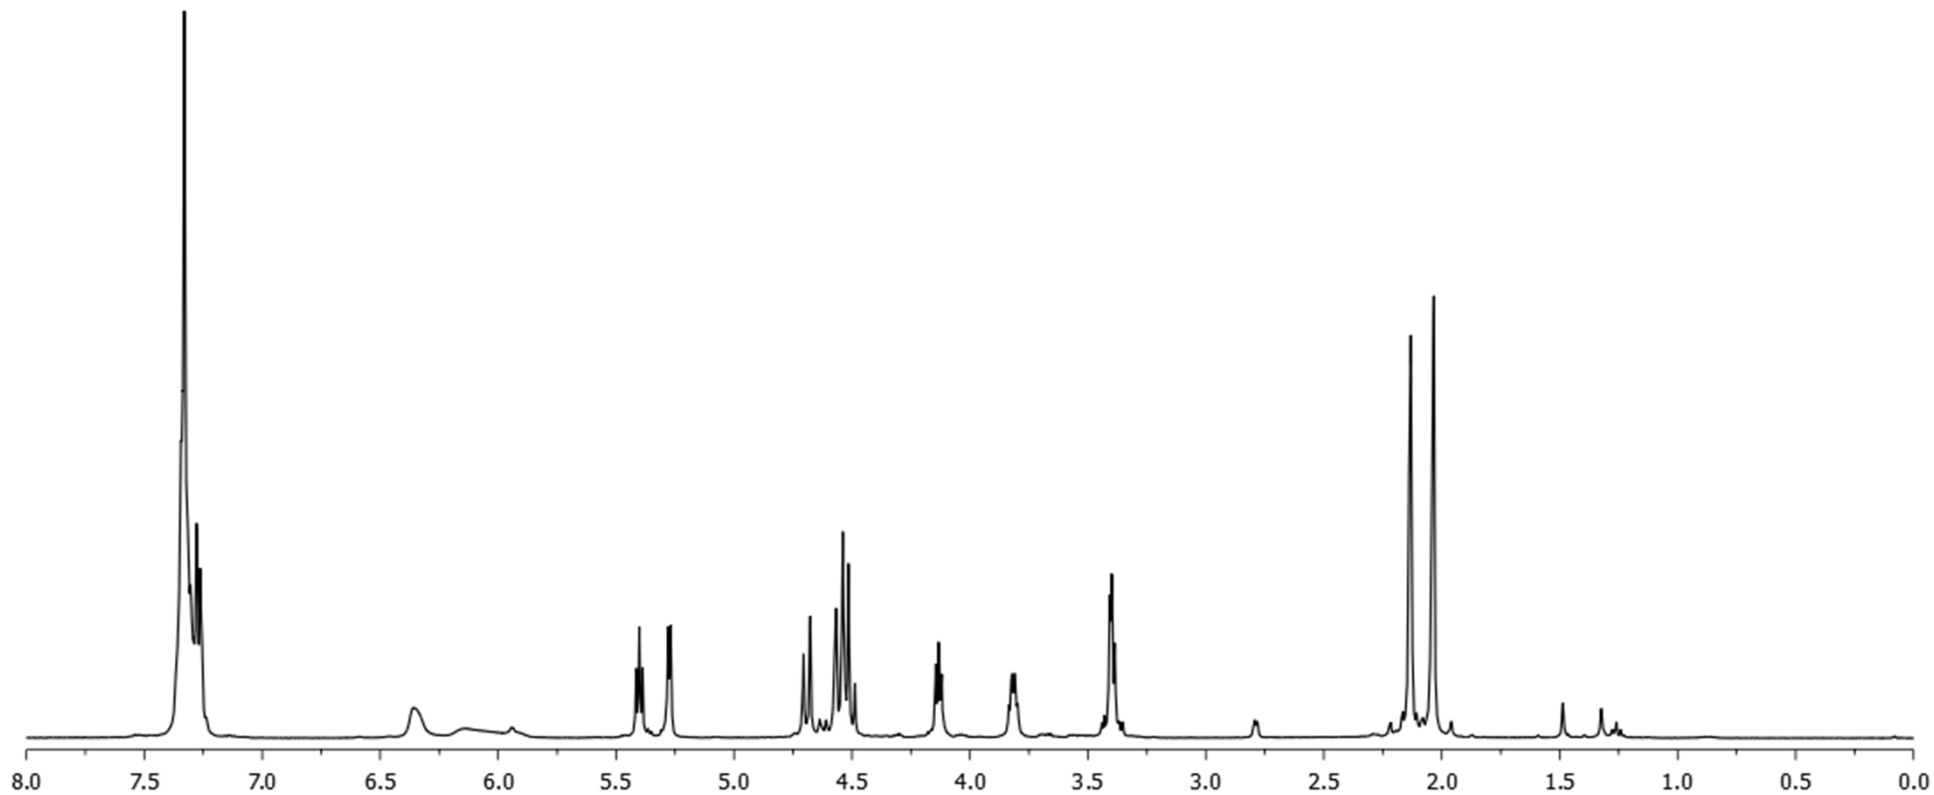

$^1\text{H-NMR}$  ( $\text{CDCl}_3$ , 400 MHz,  $\delta$  ppm)

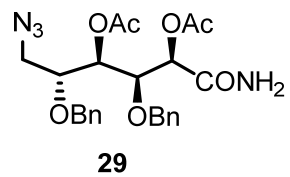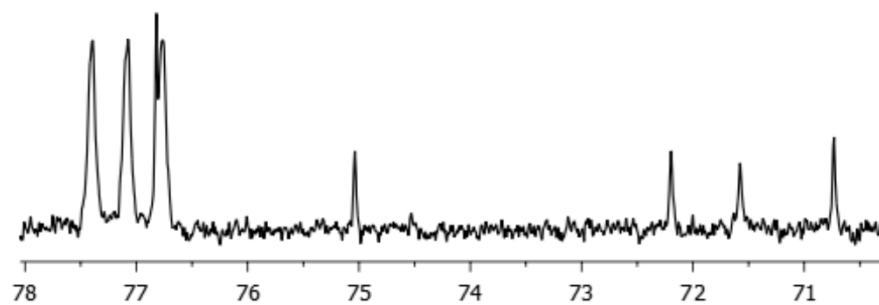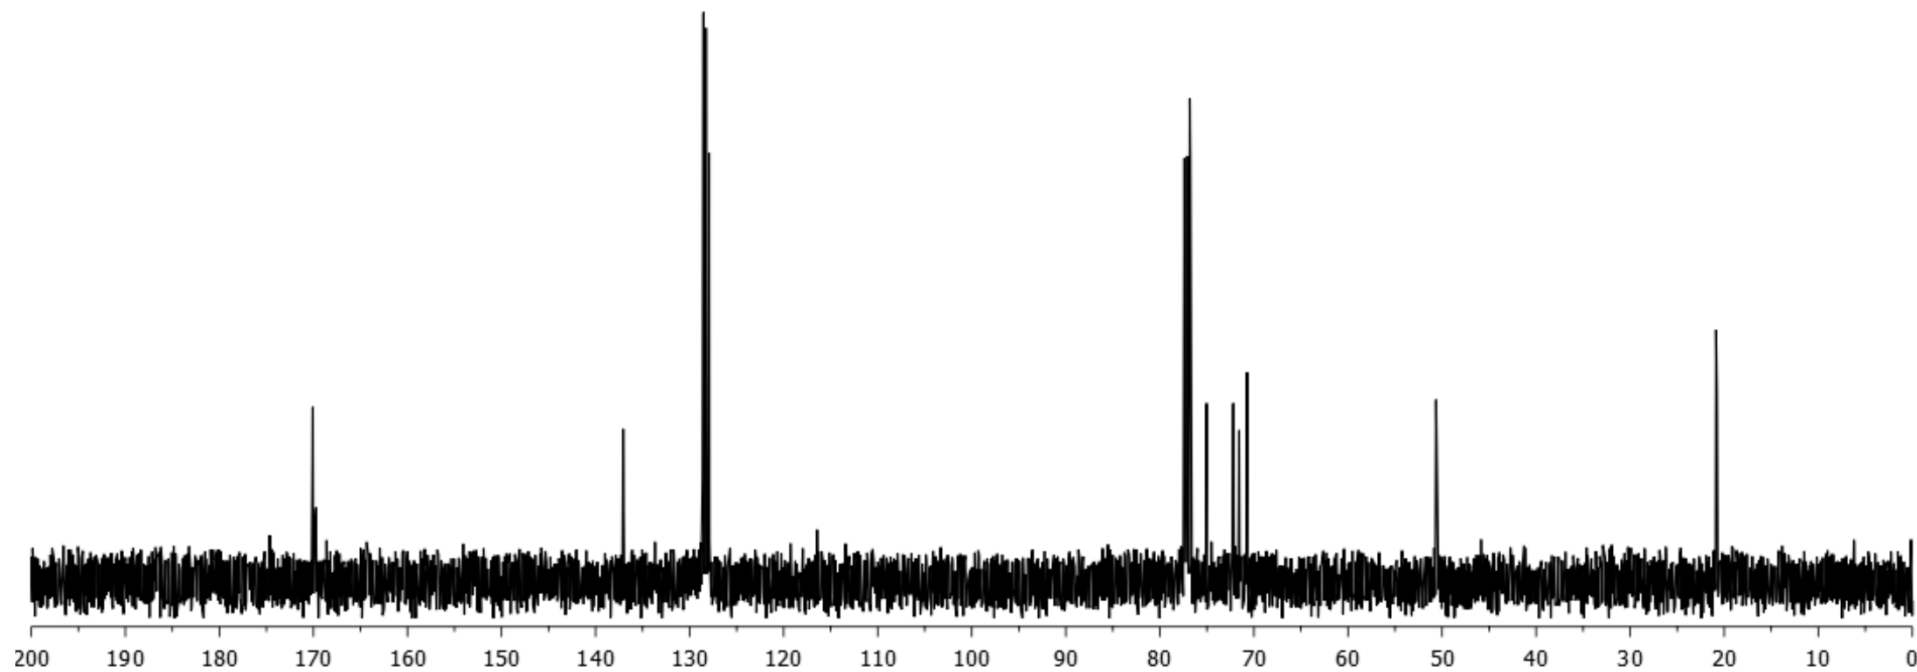

$^{13}\text{C}$ -RMN ( $\text{CDCl}_3$ , 100 MHz,  $\delta$  ppm)

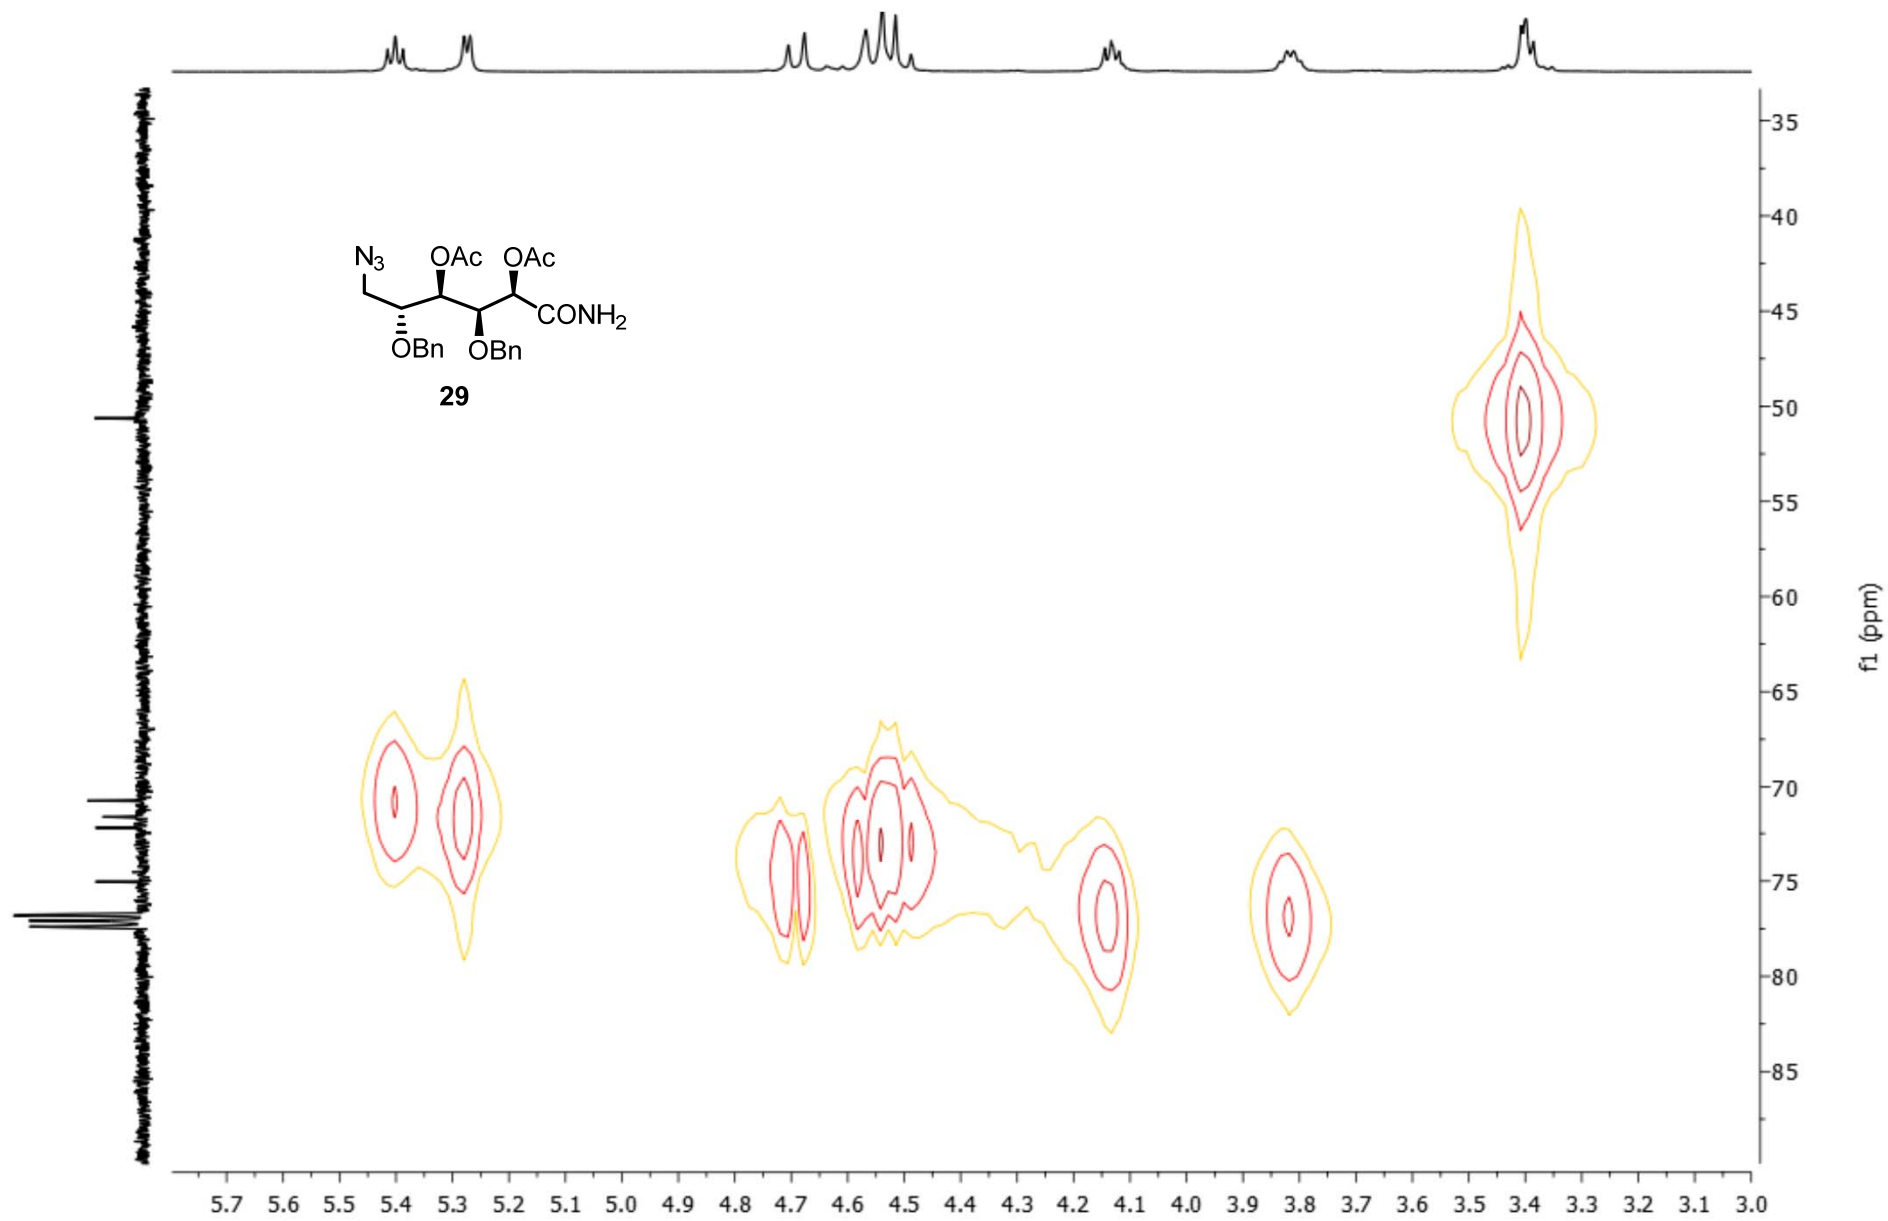

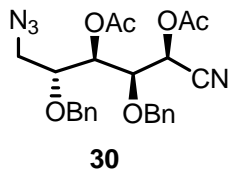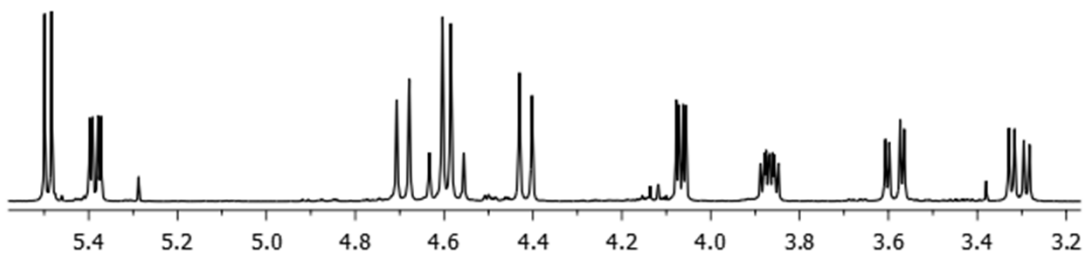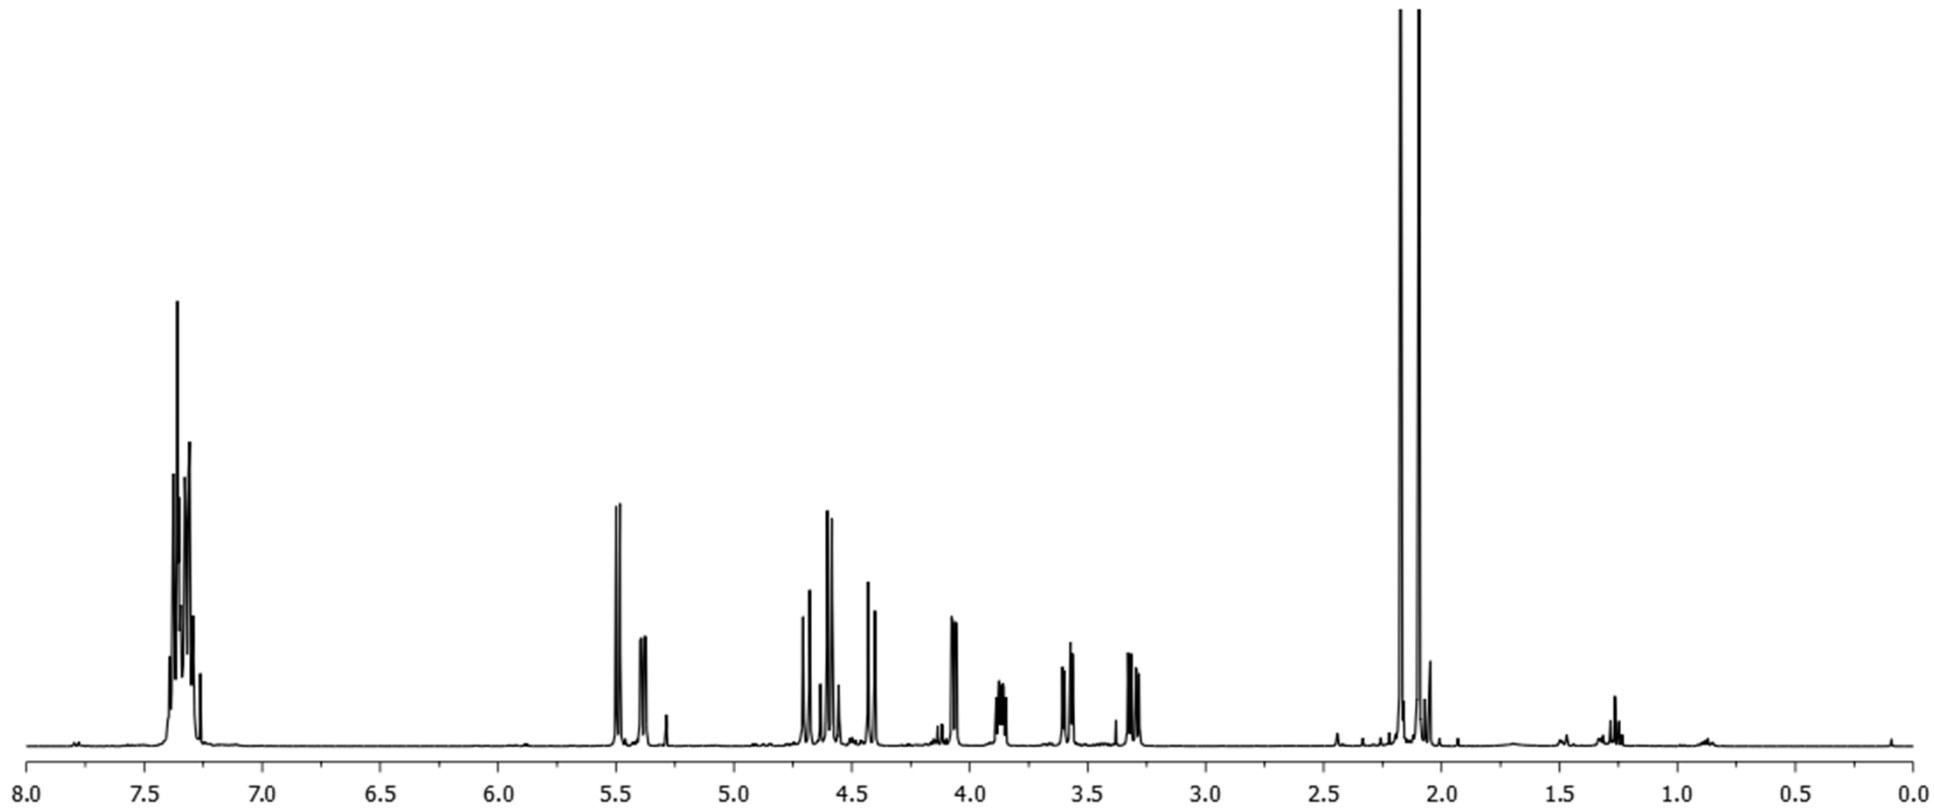

<sup>1</sup>H-RMN (CDCl<sub>3</sub>, 400 MHz, δ ppm)

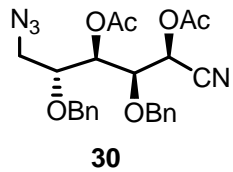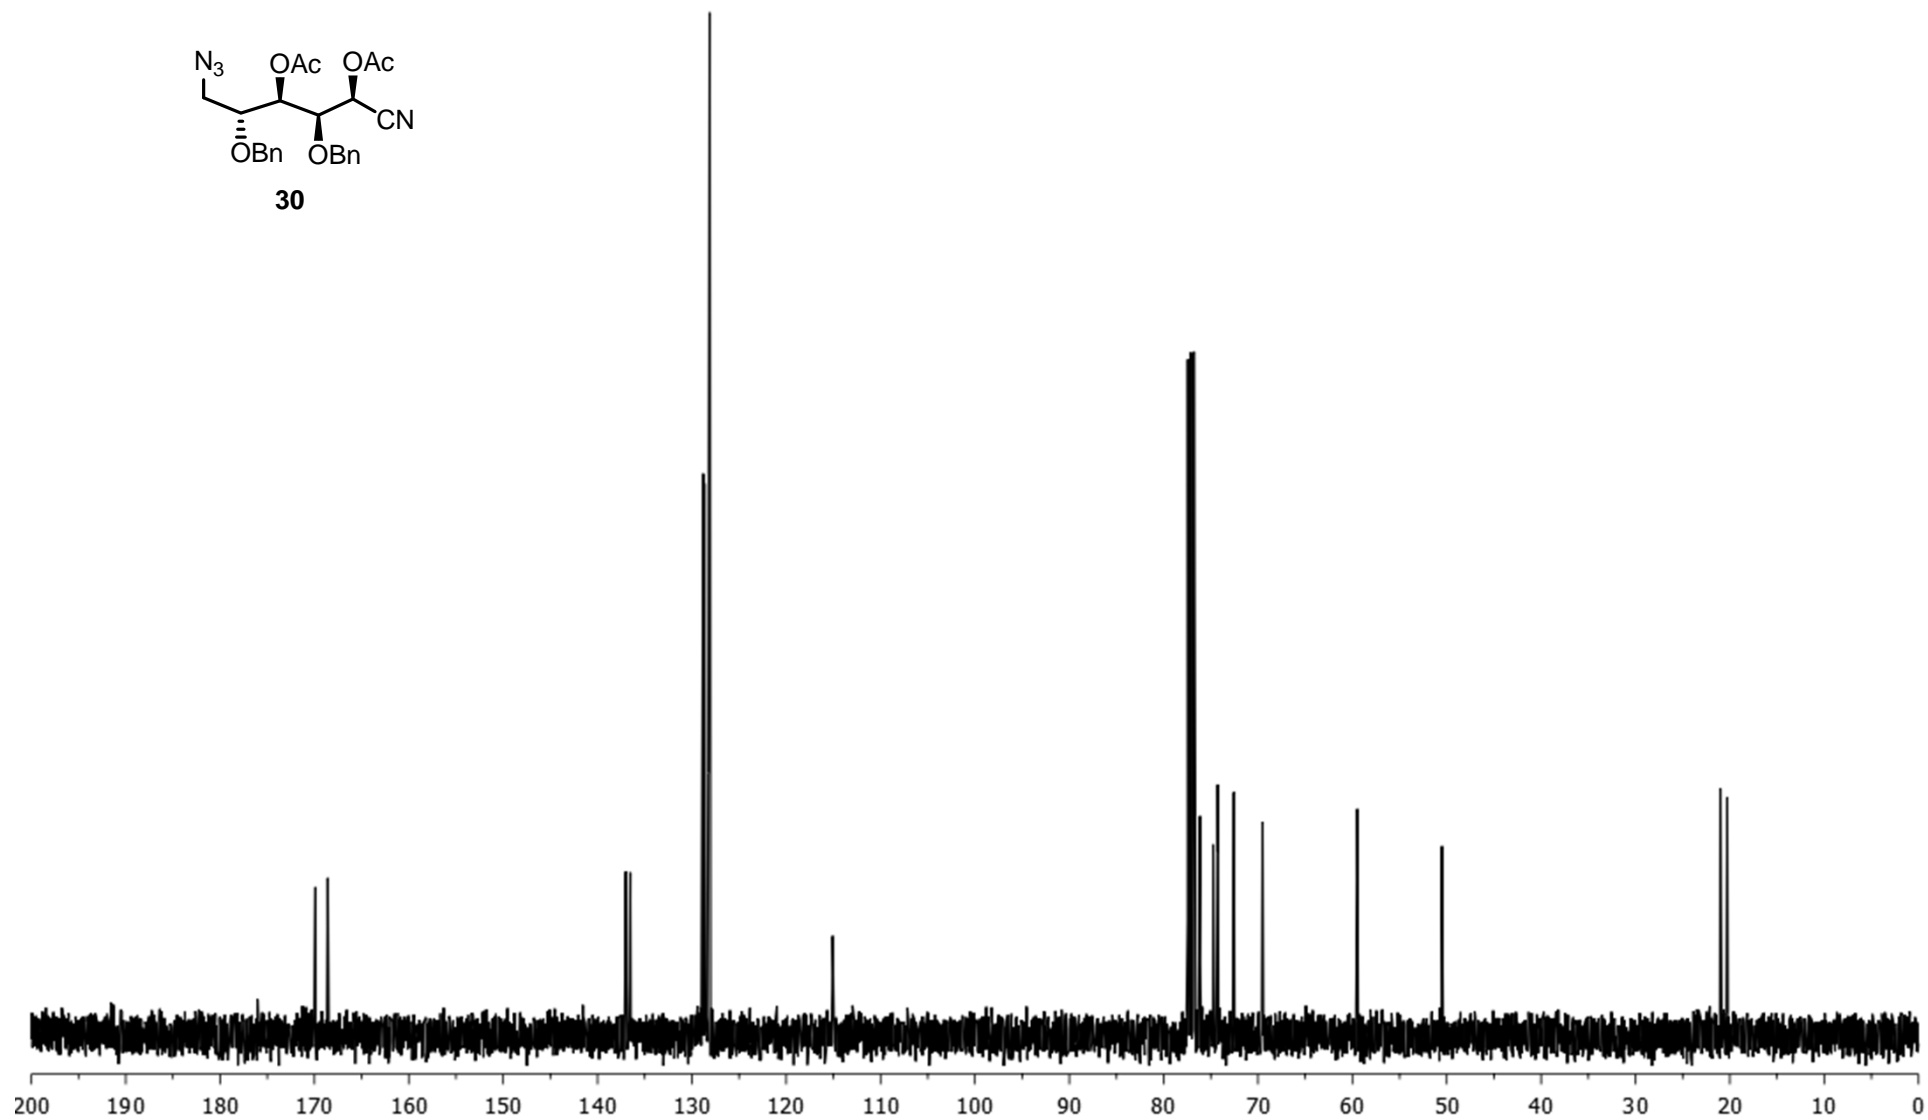

$^{13}\text{C}$ -RMN ( $\text{CDCl}_3$ , 100 MHz,  $\delta$  ppm)

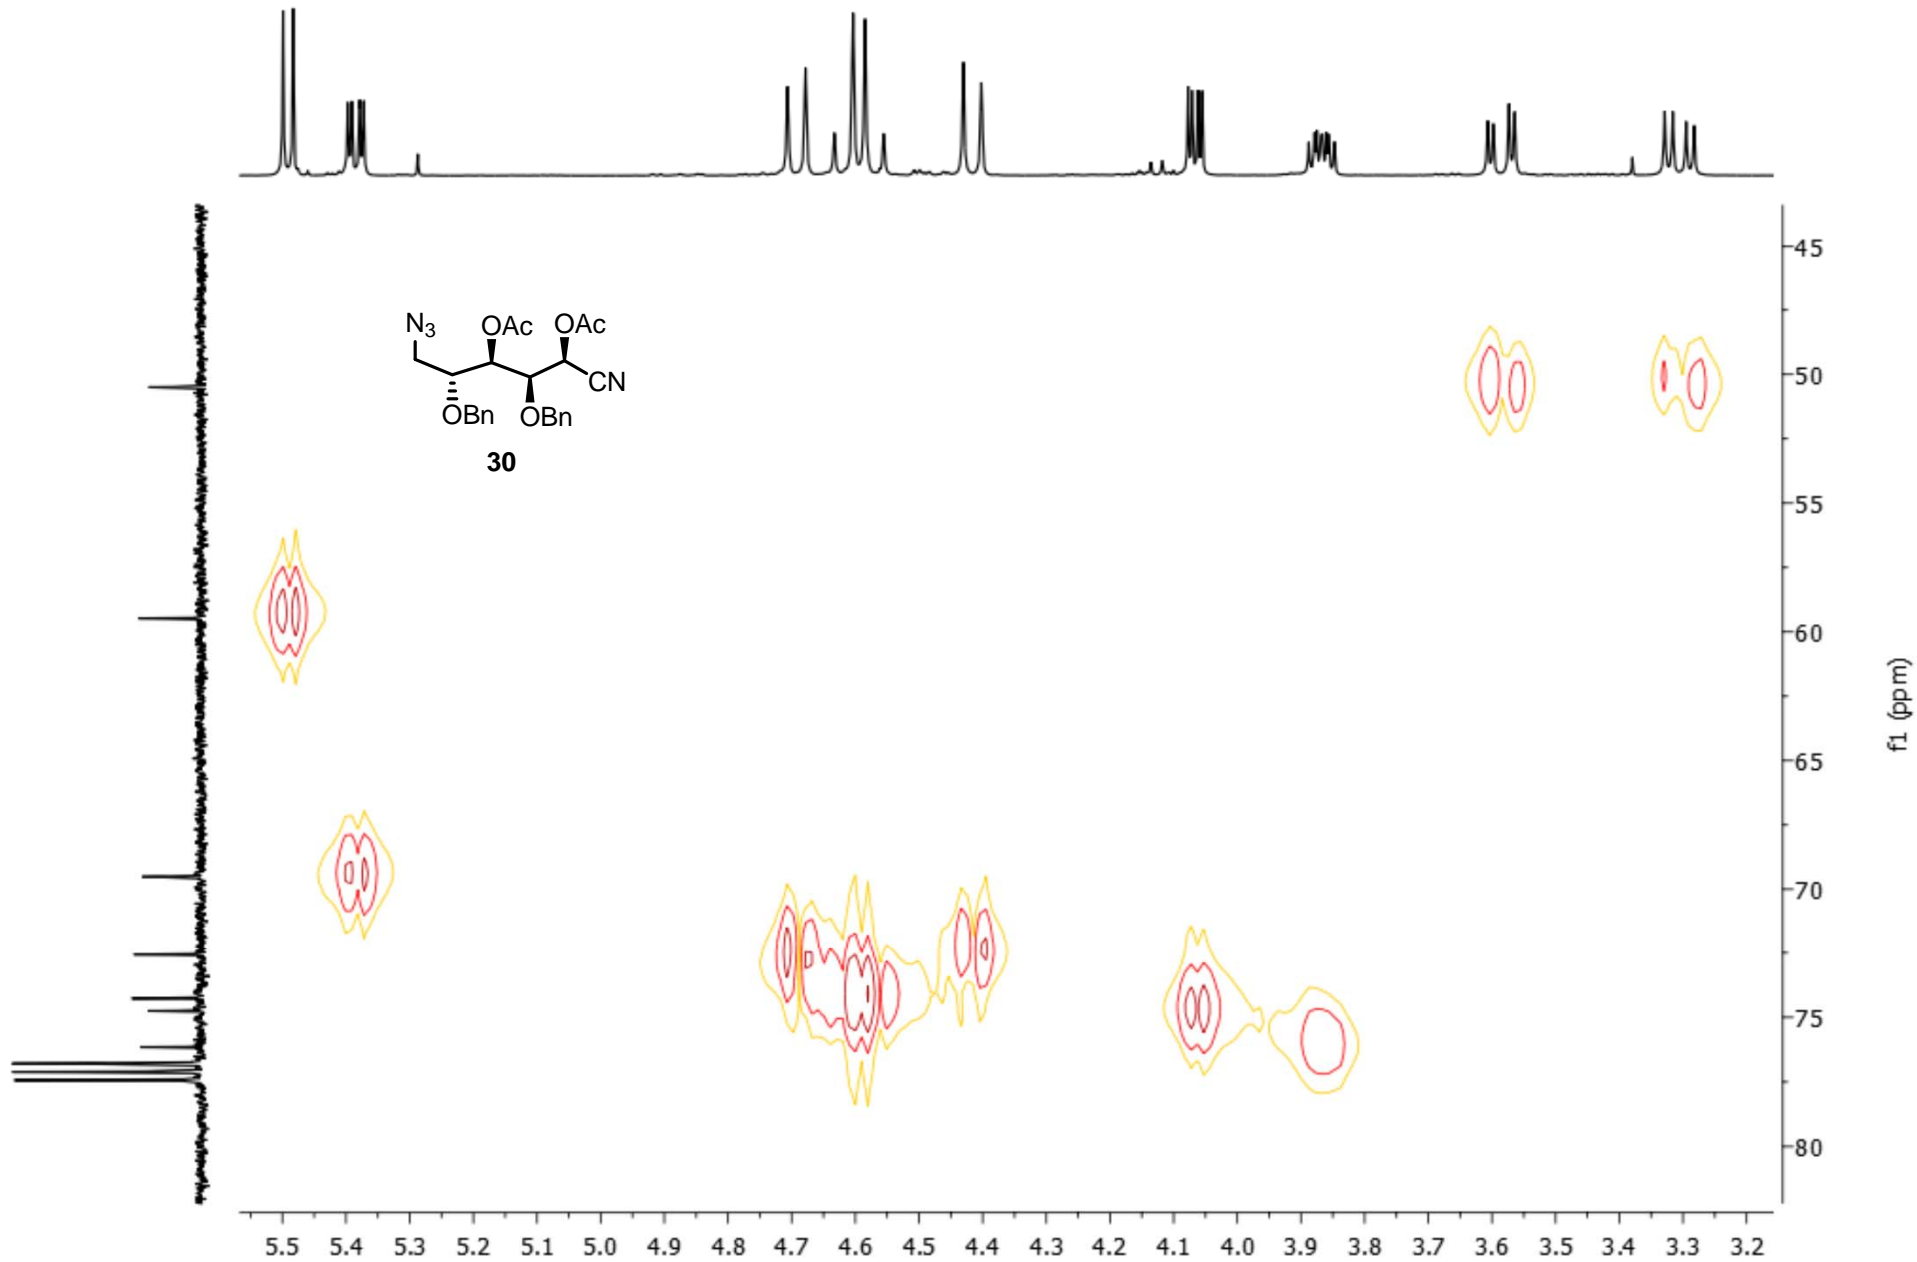

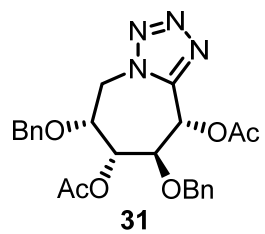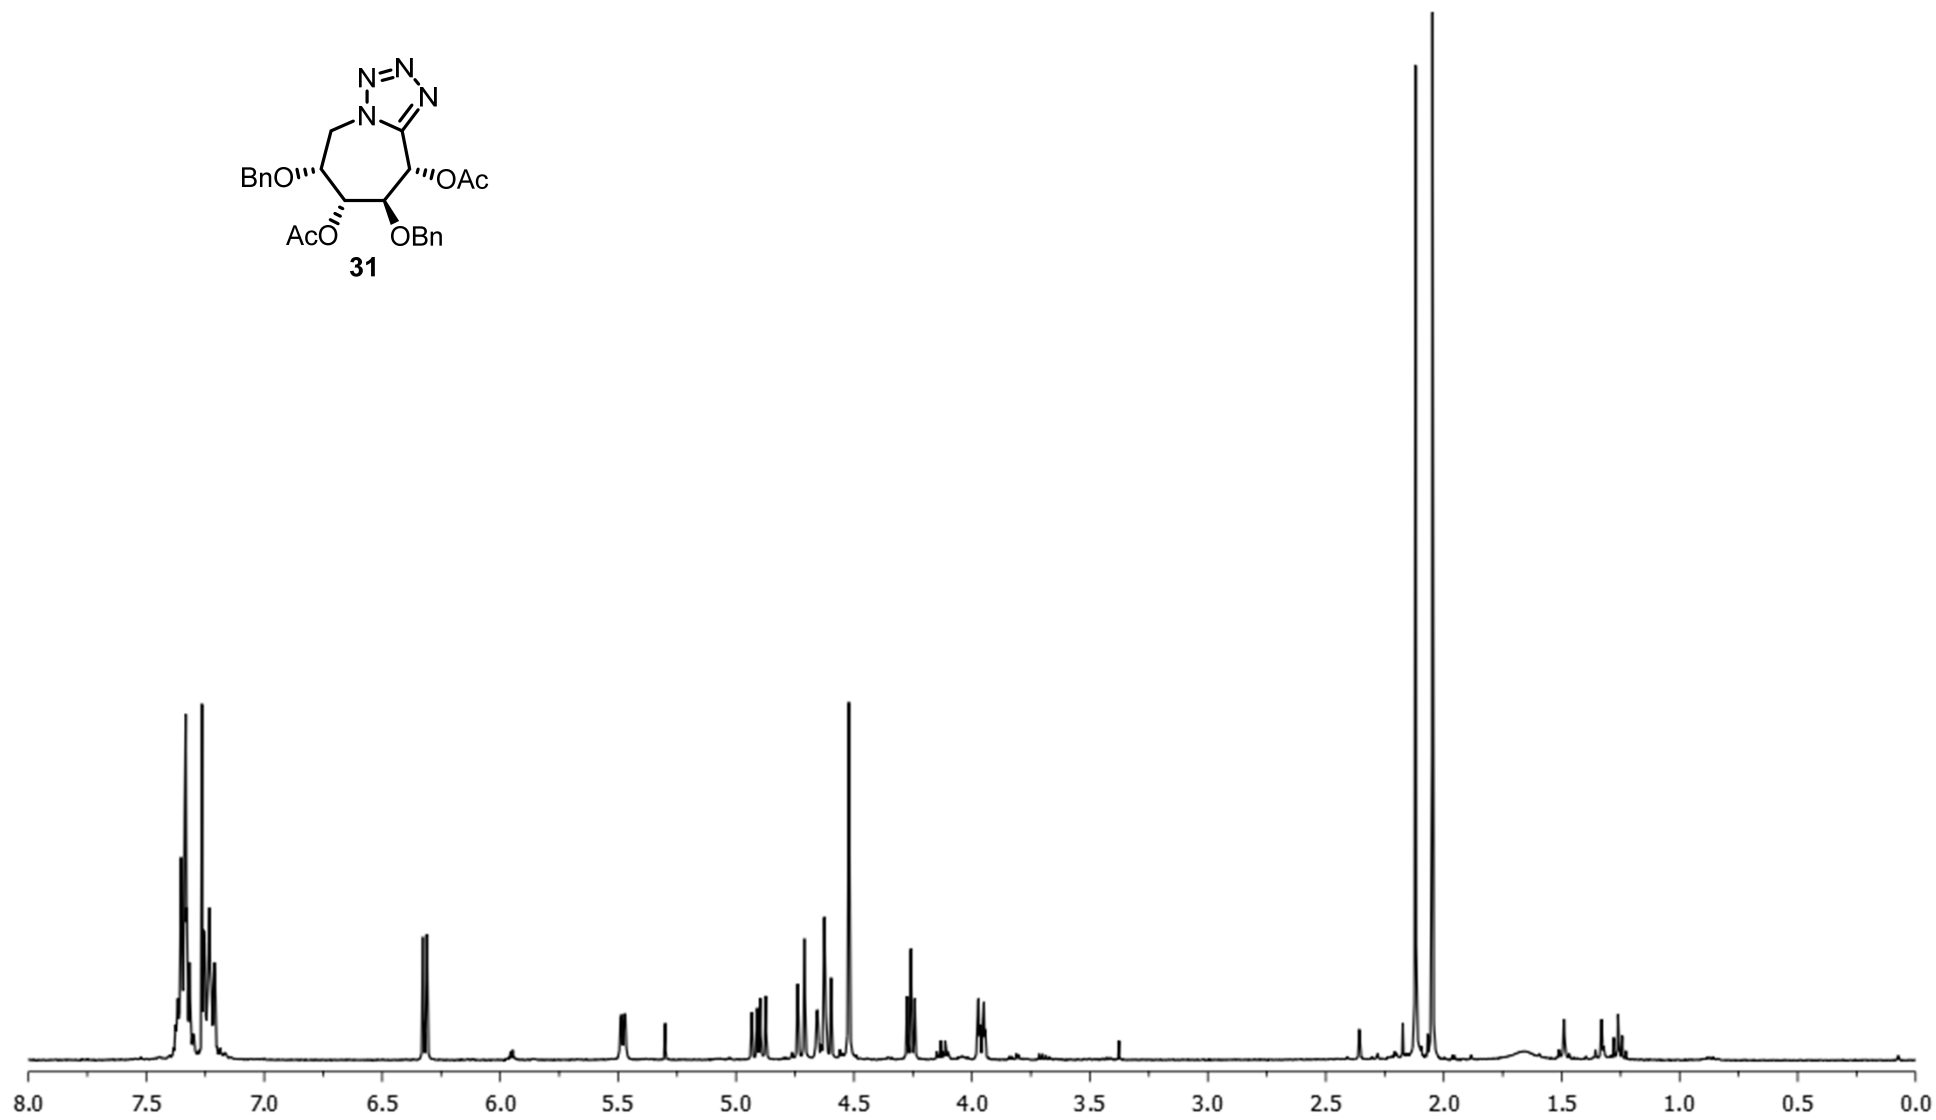

<sup>1</sup>H-RMN (CDCl<sub>3</sub>, 400 MHz, δ ppm)

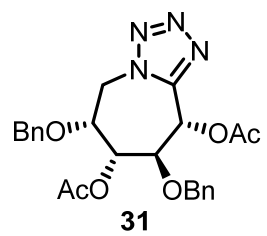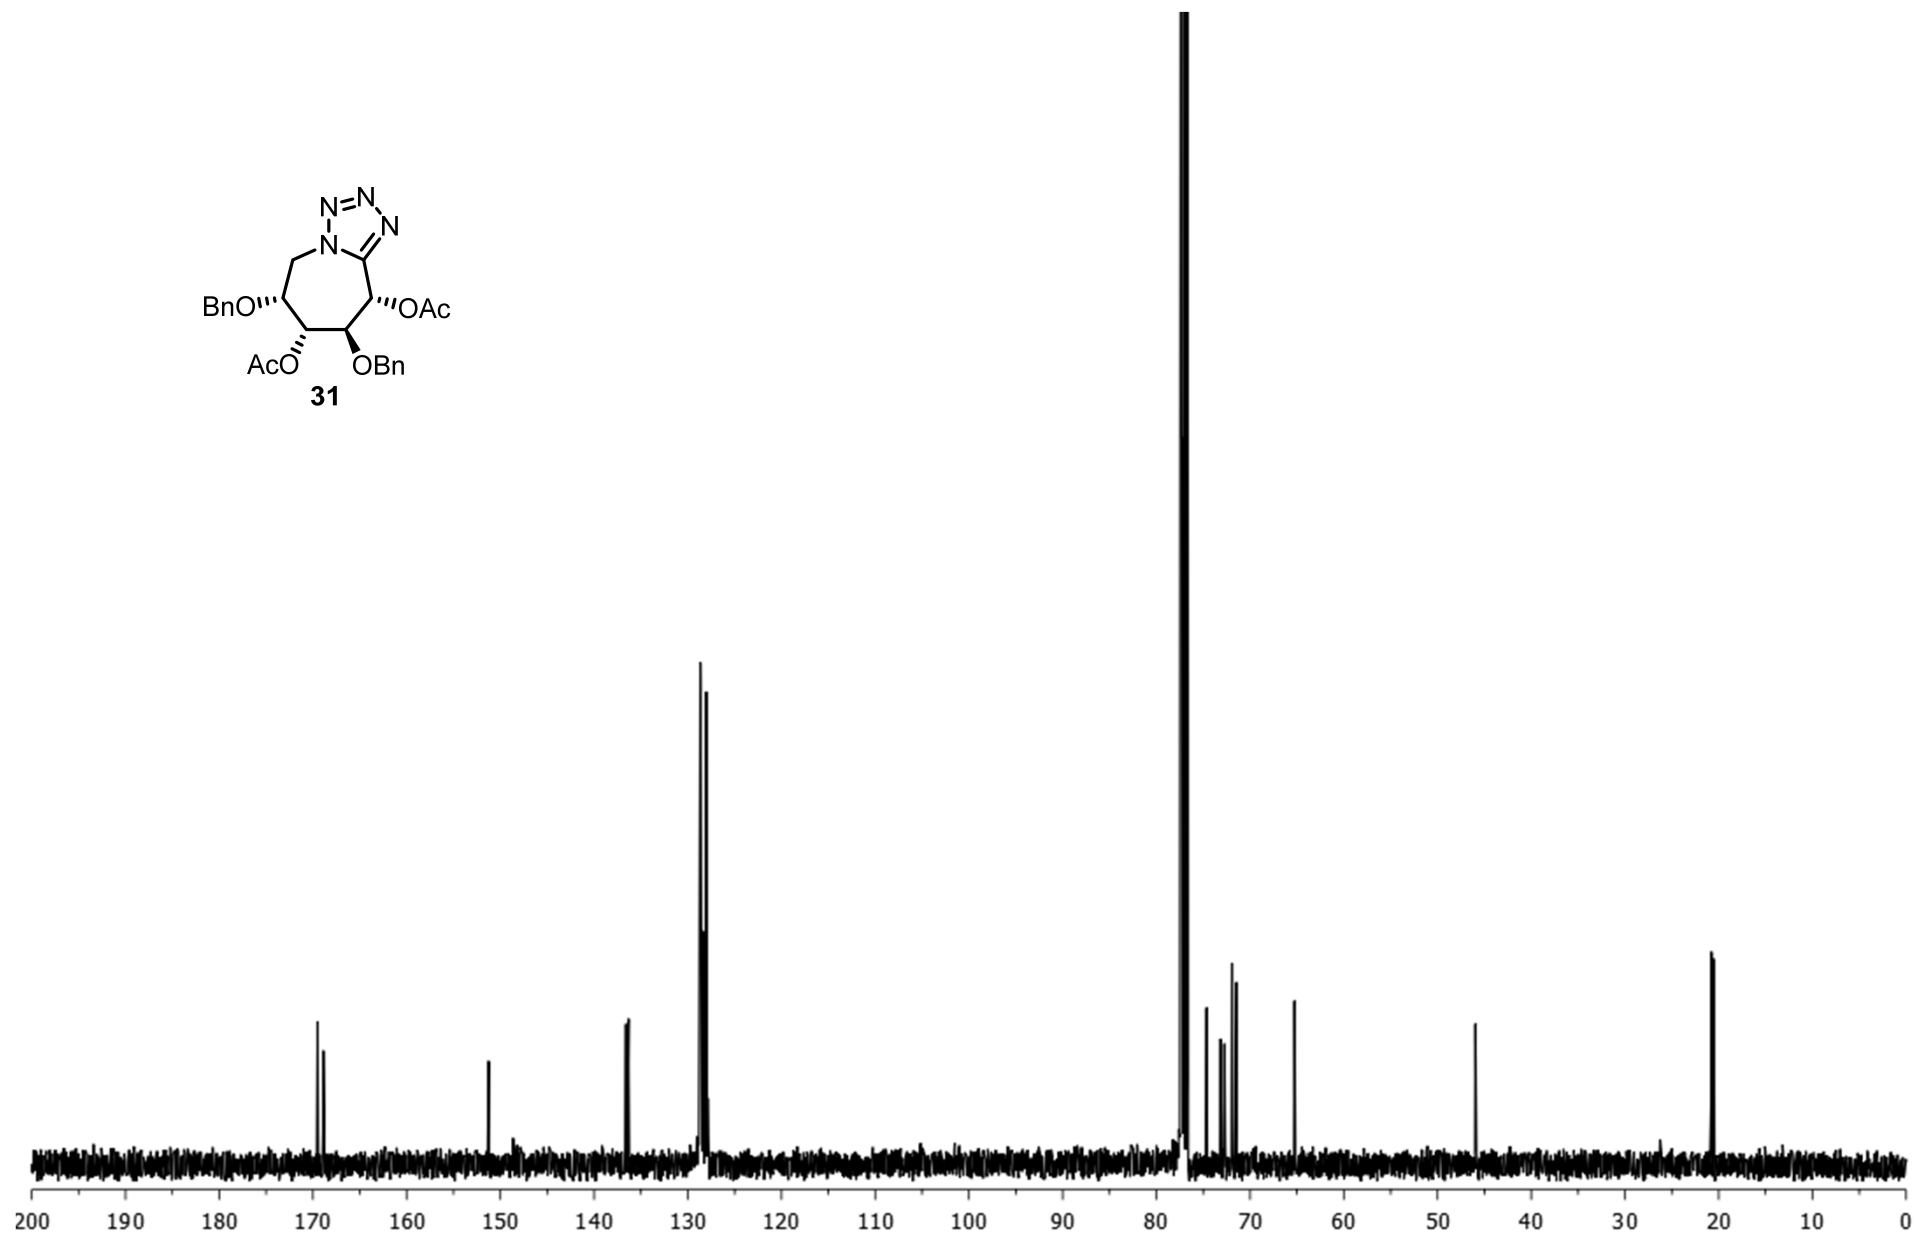

<sup>13</sup>C-RMN (CDCl<sub>3</sub>, 100 MHz, δ ppm)



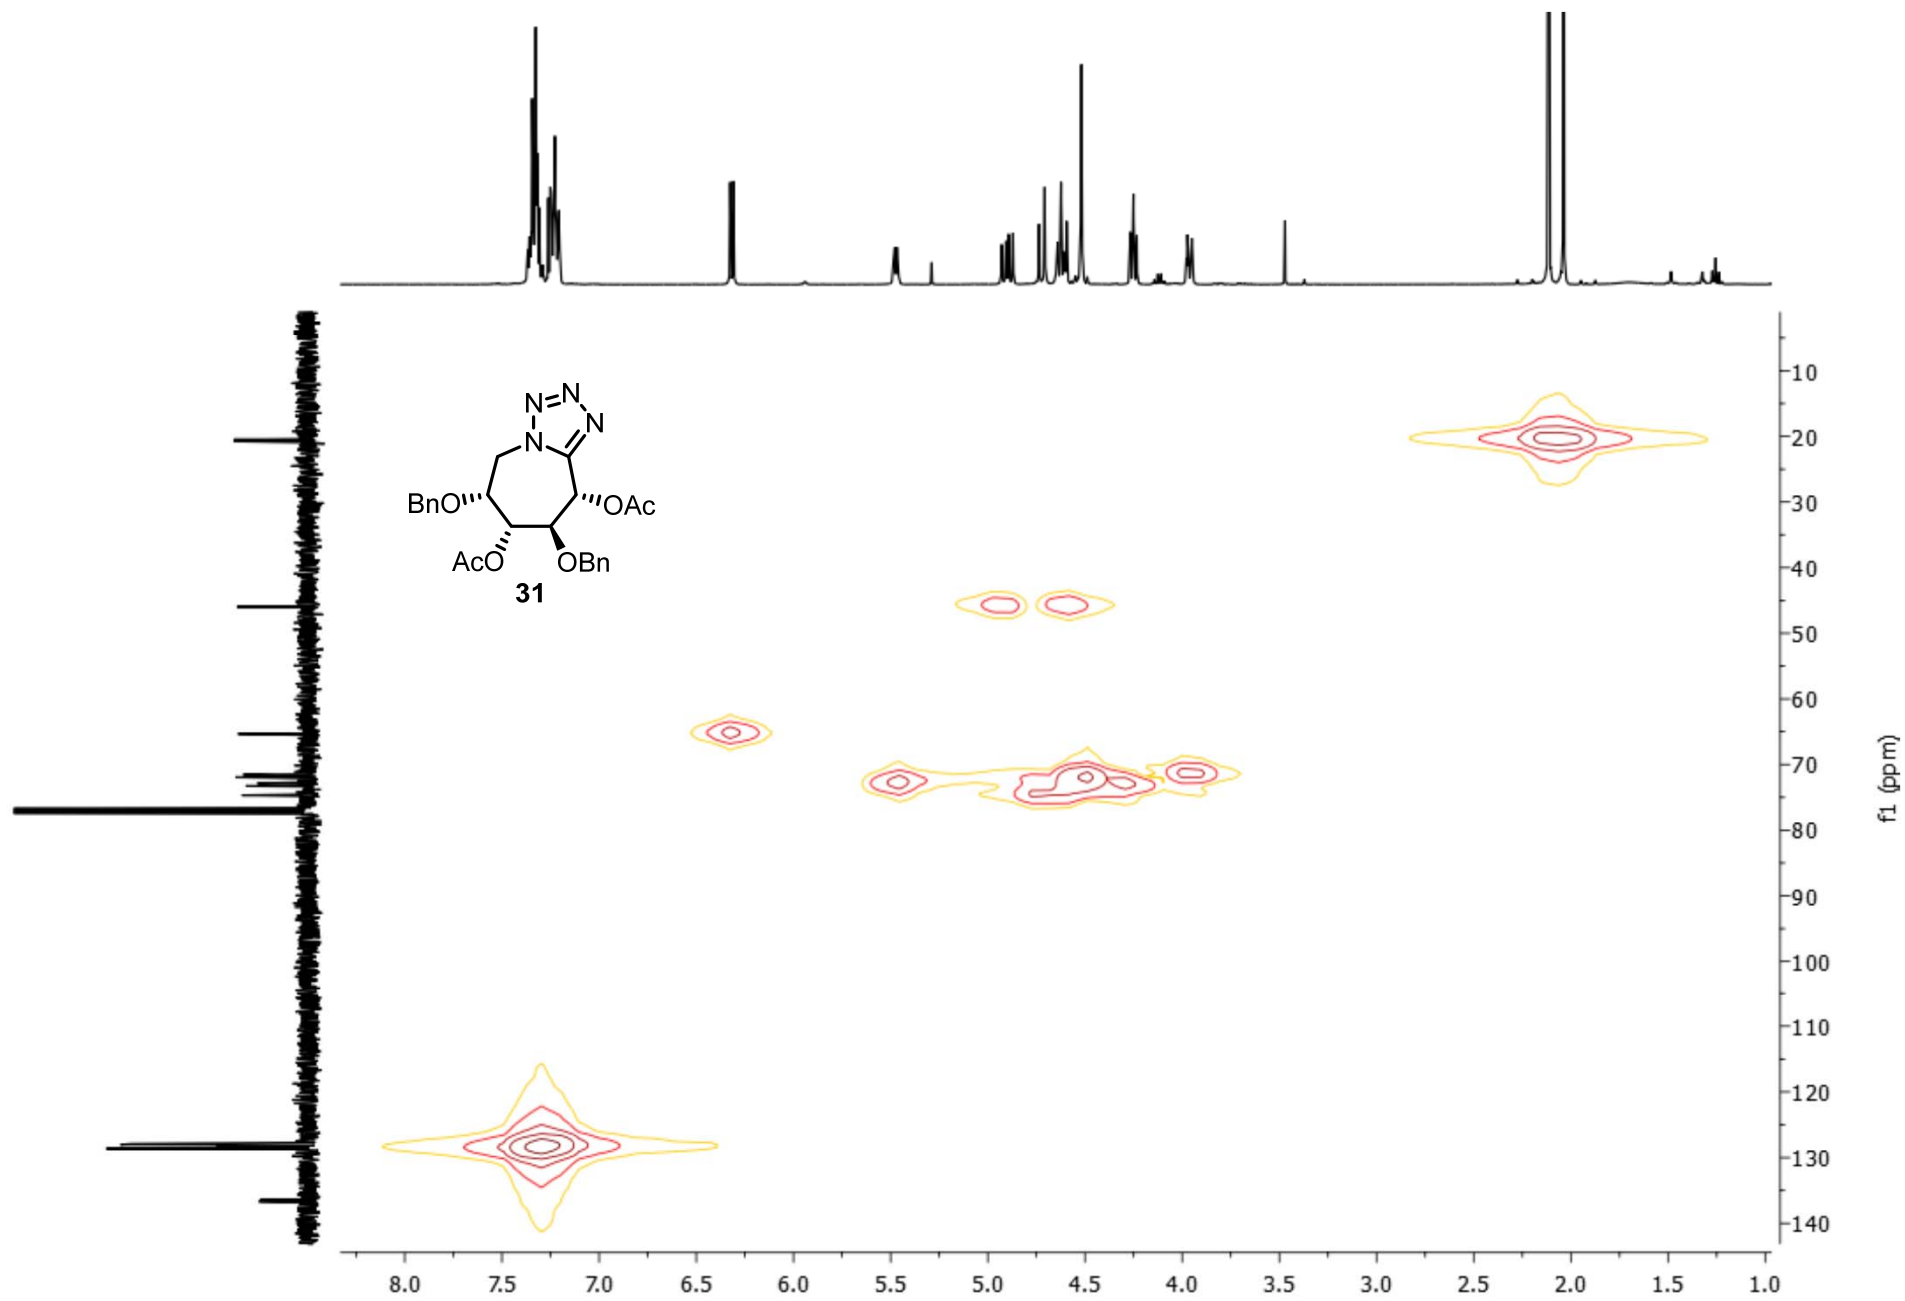

$^1\text{H}$ -RMN (CDCl<sub>3</sub>, 400 MHz,  $\delta$  ppm)

$^{13}\text{C}$ -RMN (CDCl<sub>3</sub>, 100 MHz,  $\delta$  ppm)

HMQC

41

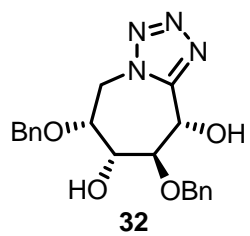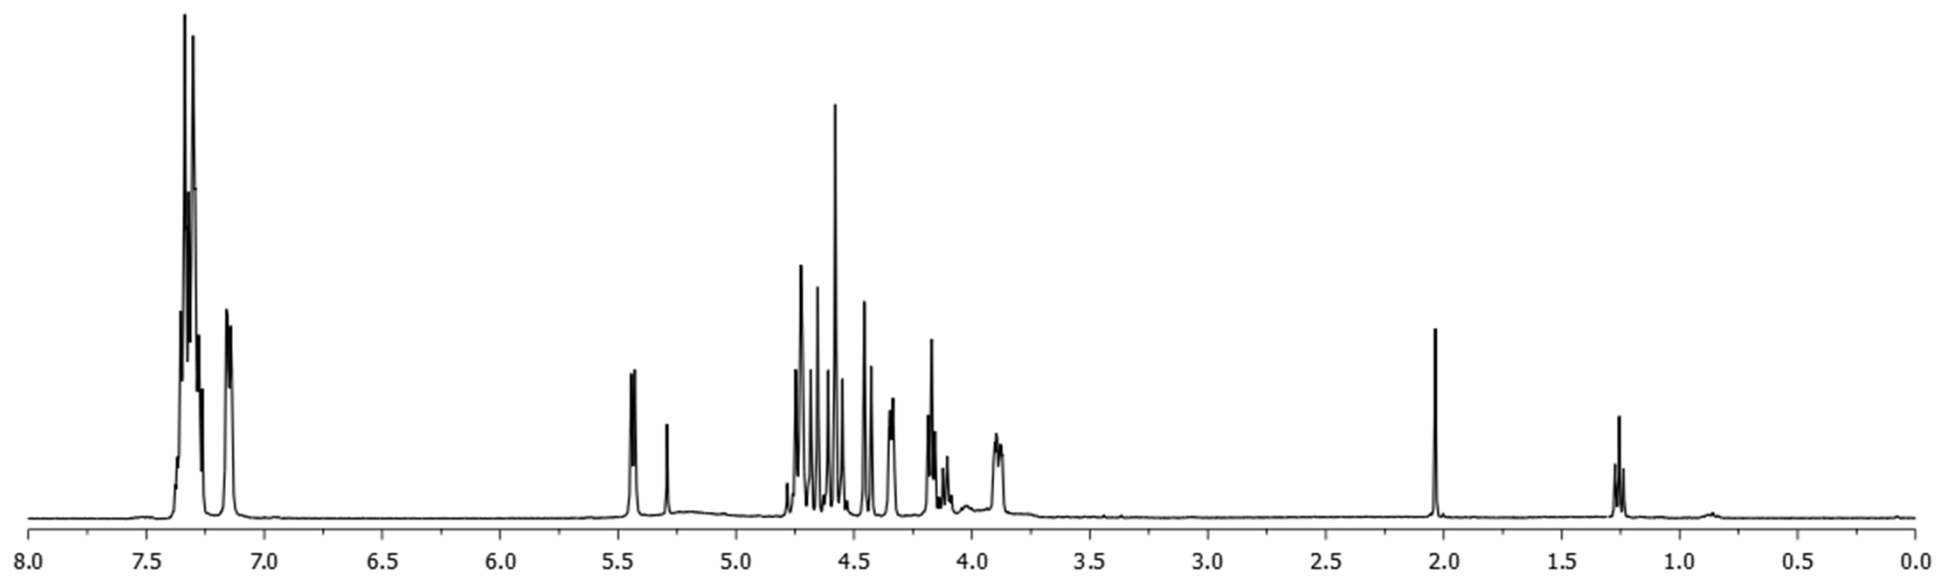

<sup>1</sup>H-RMN (CDCl<sub>3</sub>, 400 MHz, δ ppm)

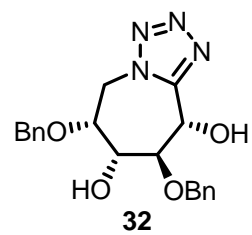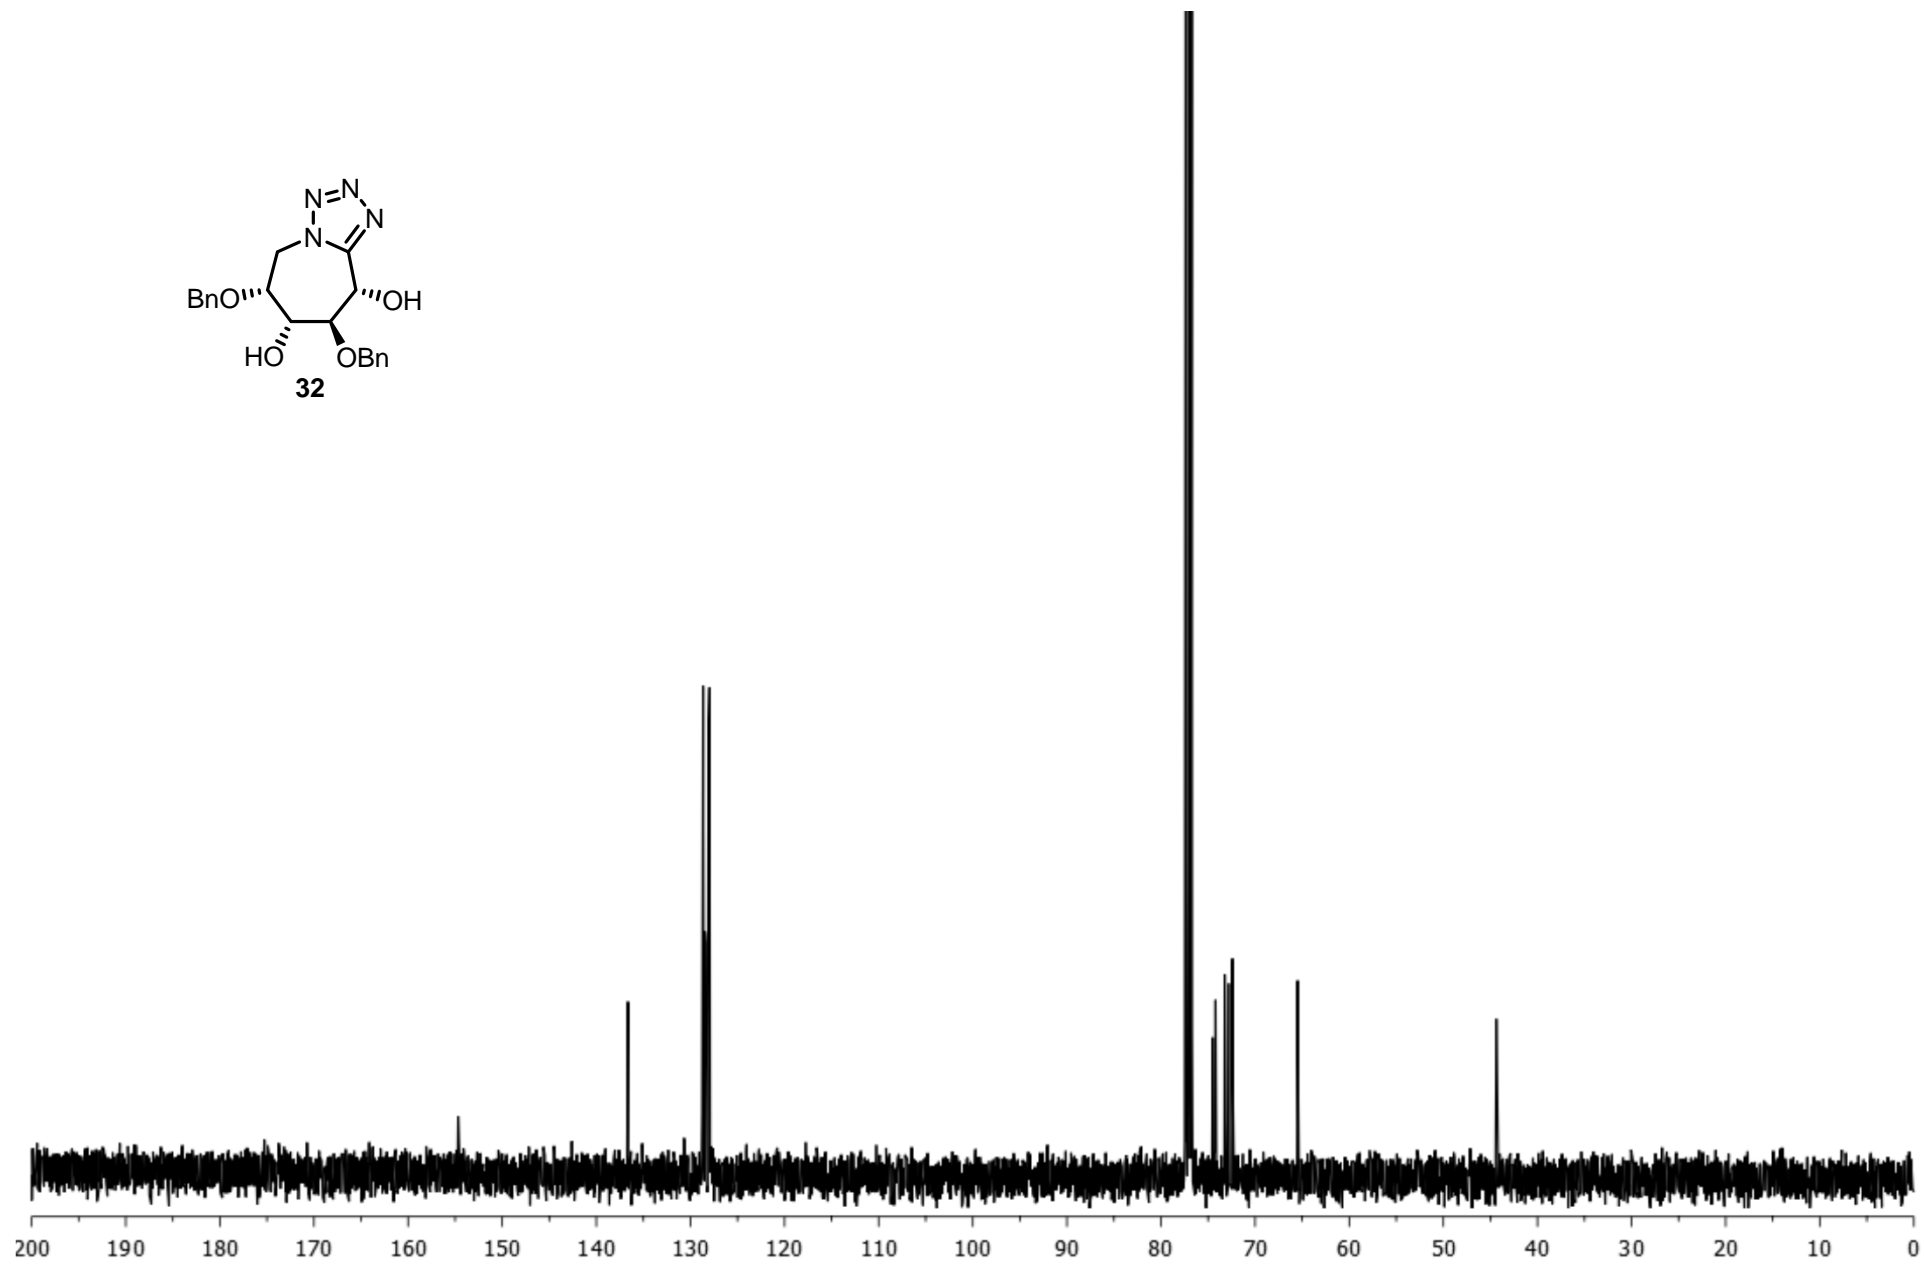

$^{13}\text{C}$ -RMN (CDCl<sub>3</sub>, 100 MHz,  $\delta$  ppm)

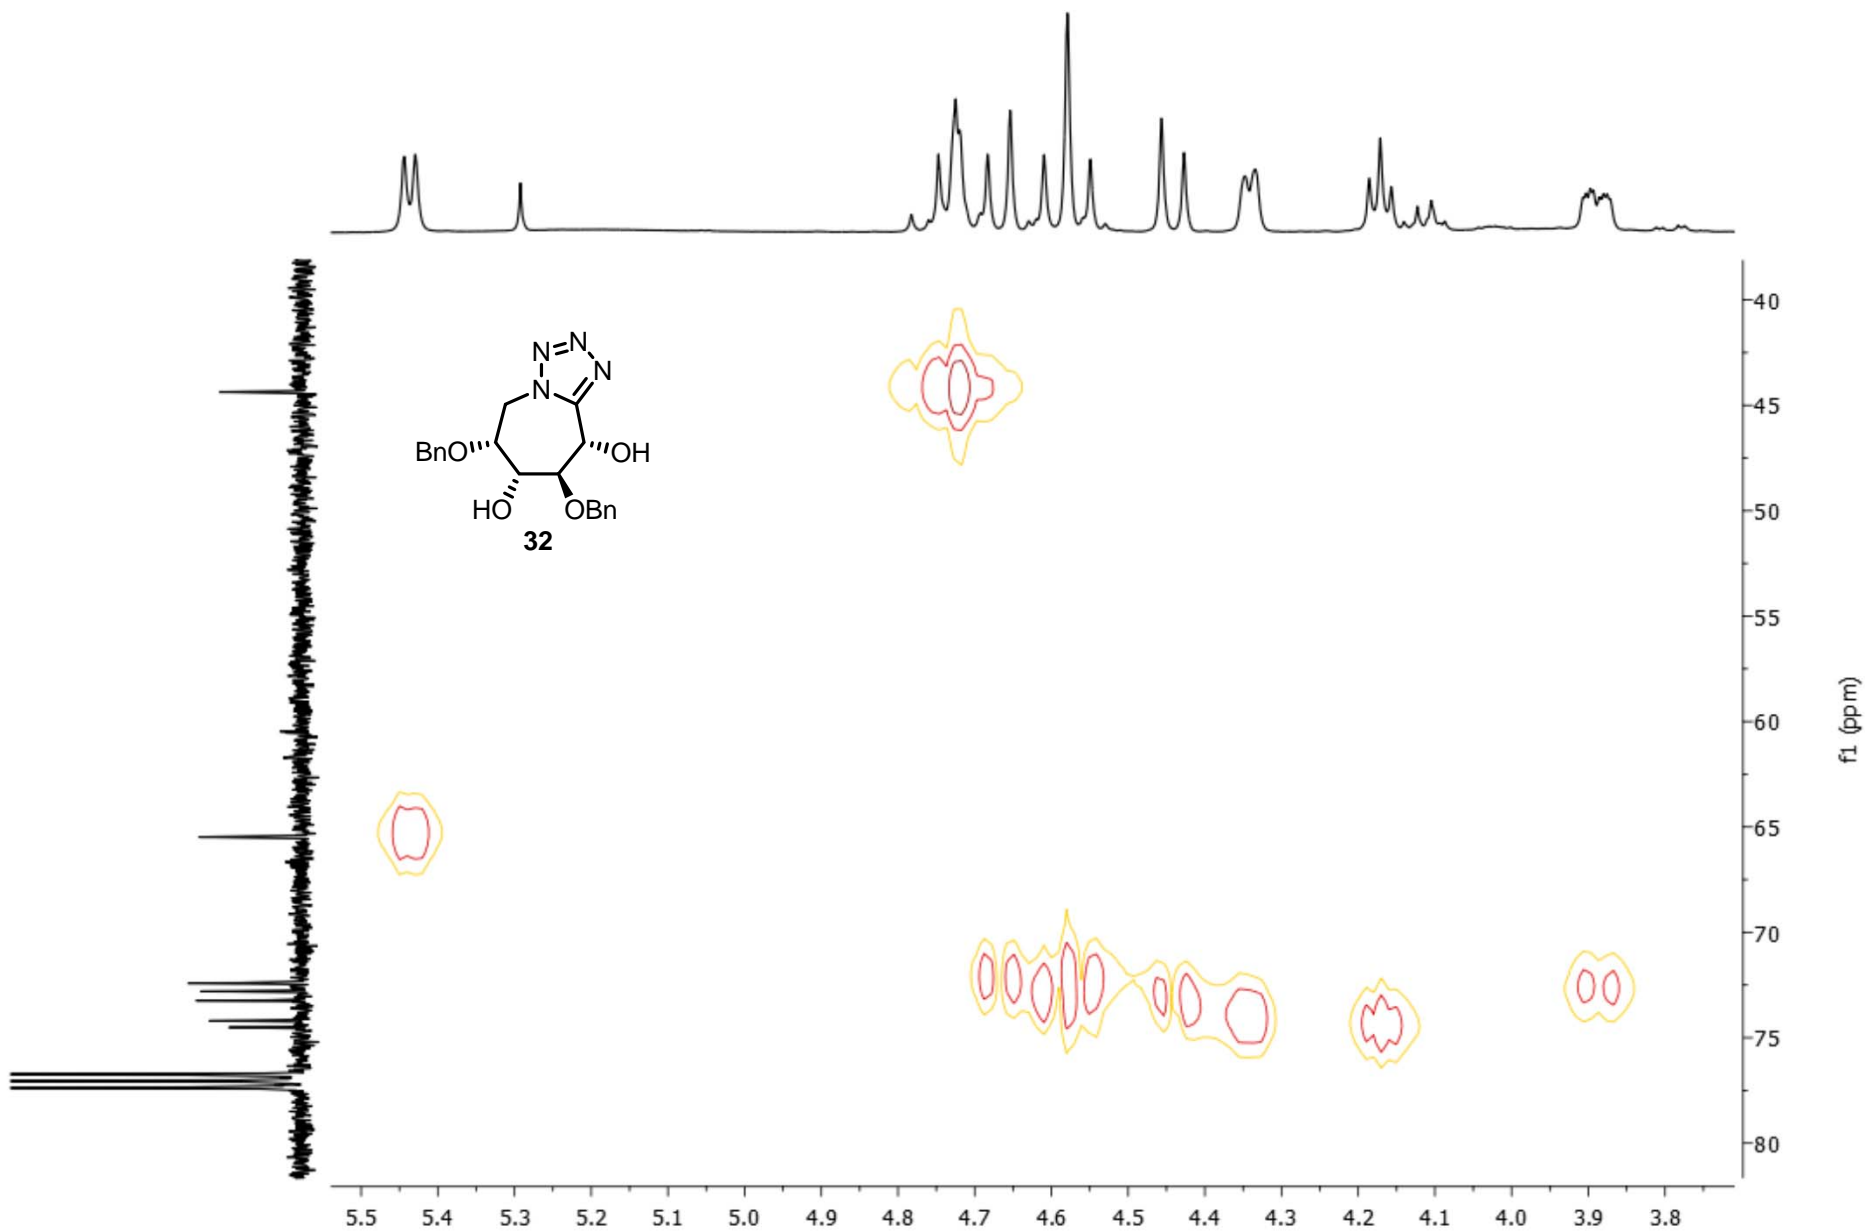

$^1\text{H}$ -RMN ( $\text{CDCl}_3$ , 400 MHz,  $\delta$  ppm)

$^{13}\text{C}$ -RMN ( $\text{CDCl}_3$ , 100 MHz,  $\delta$  ppm)

HMQC

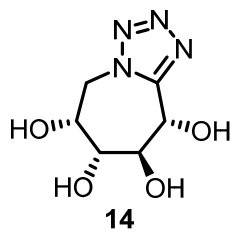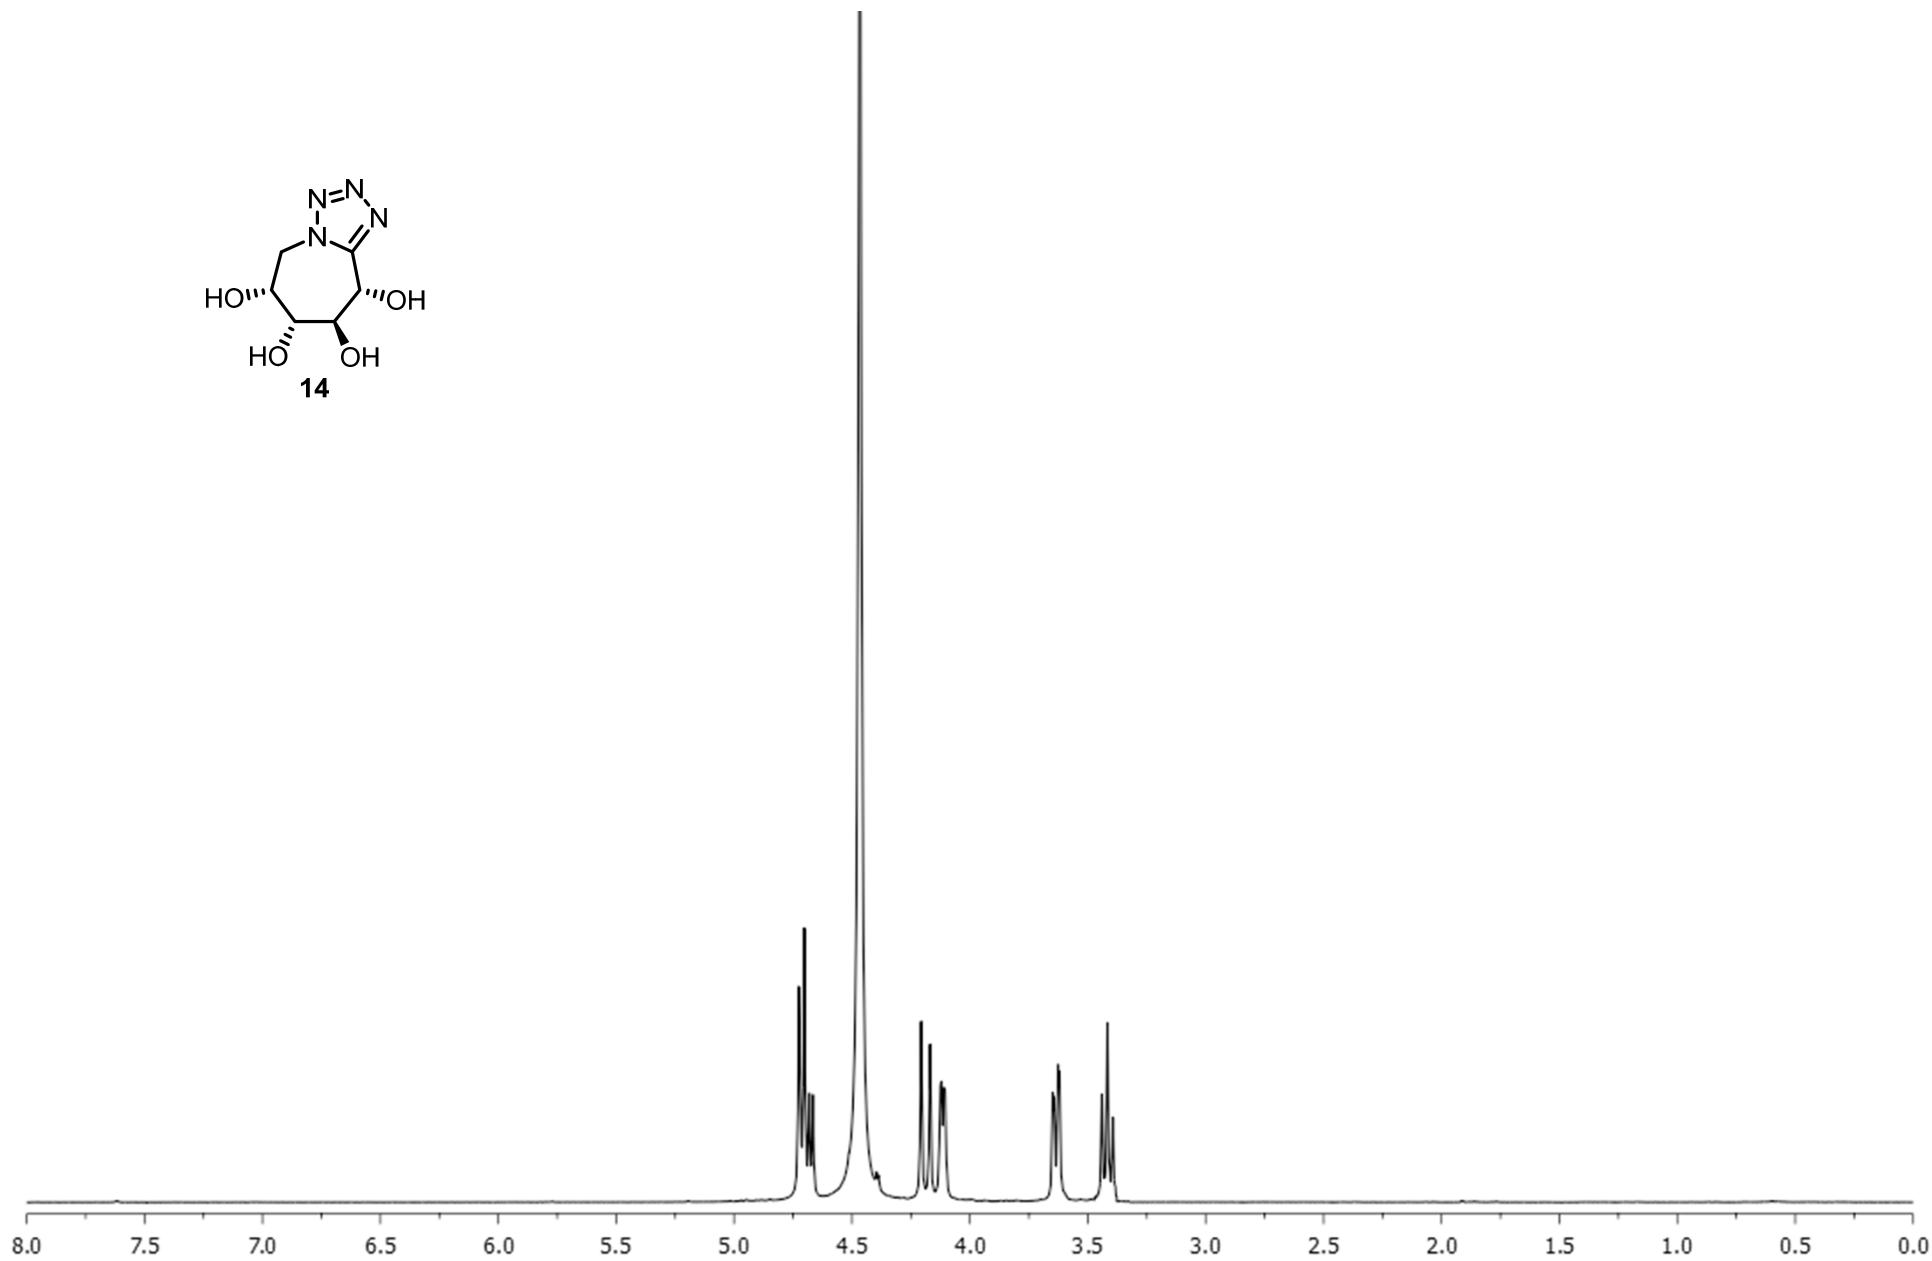

$^1\text{H-RMN}$  ( $\text{D}_2\text{O}$ , 400 MHz,  $\delta$  ppm)

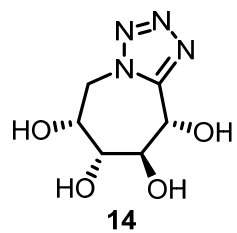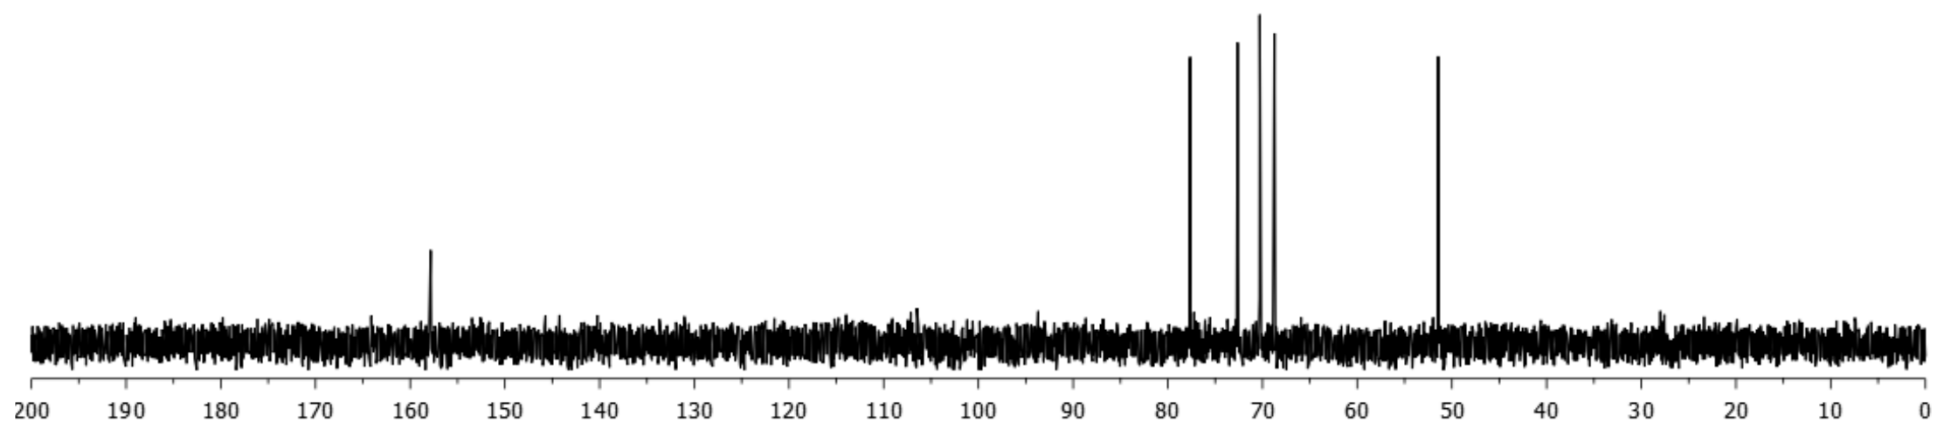

$^{13}\text{C}$ -RMN ( $\text{D}_2\text{O}$ , 100 MHz,  $\delta$  ppm)

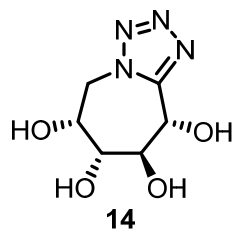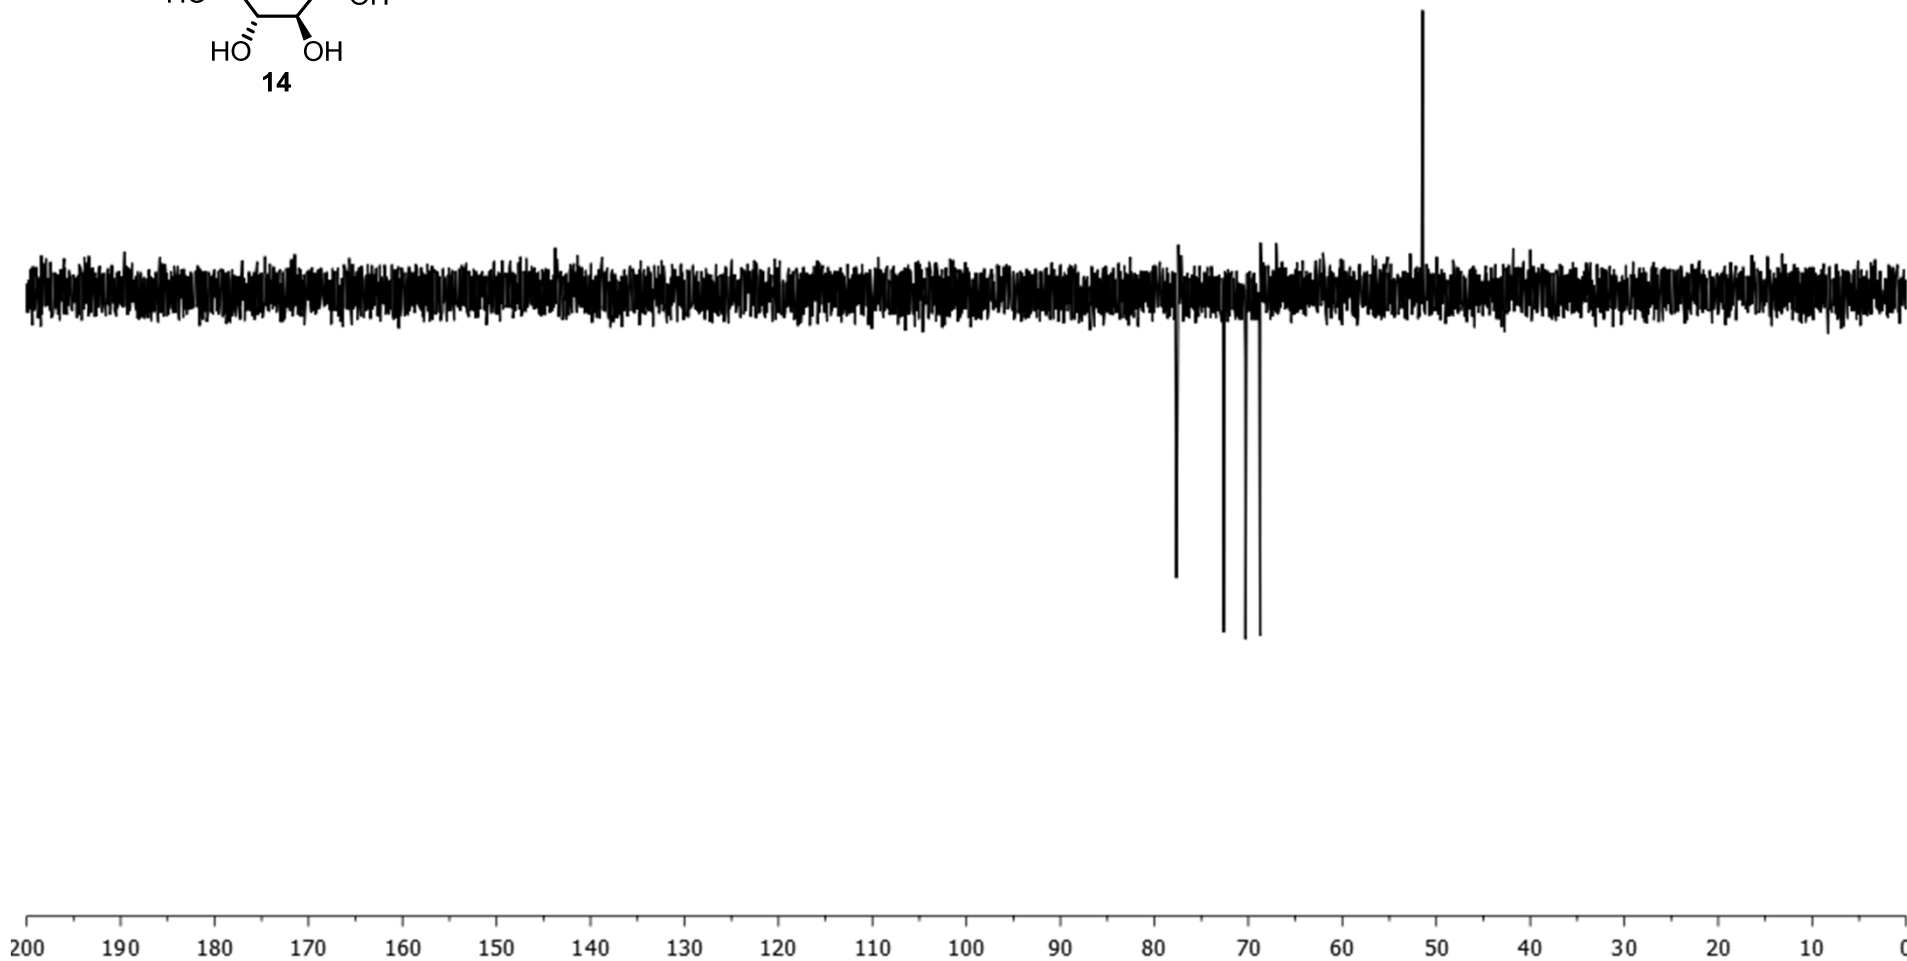

<sup>13</sup>C-RMN (CDCl<sub>3</sub>, 100 MHz, δ ppm) DEPT

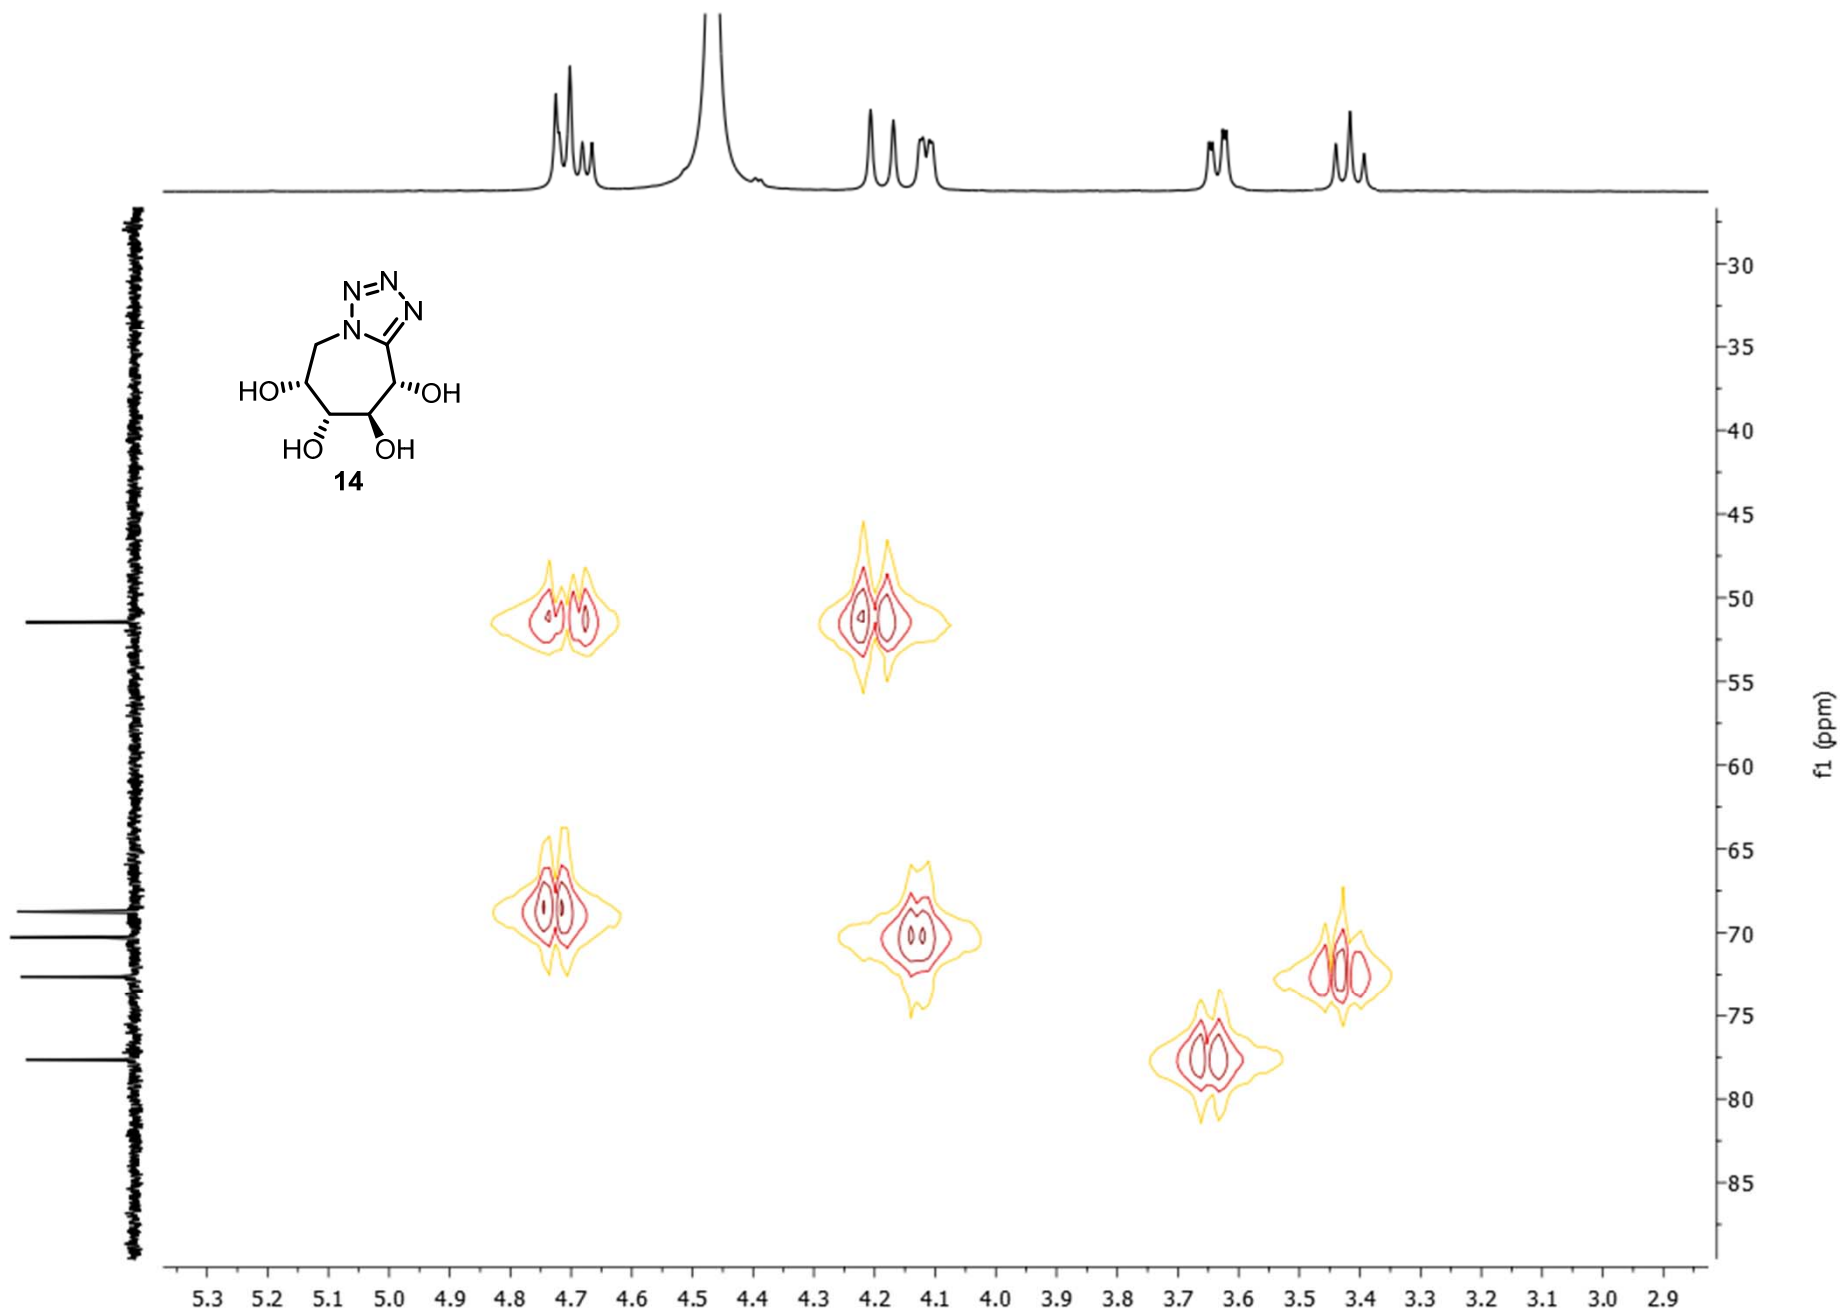

$^1\text{H}$ -RMN (D<sub>2</sub>O, 400 MHz,  $\delta$  ppm)

$^{13}\text{C}$ -RMN (D<sub>2</sub>O, 100 MHz,  $\delta$  ppm)

HMQC



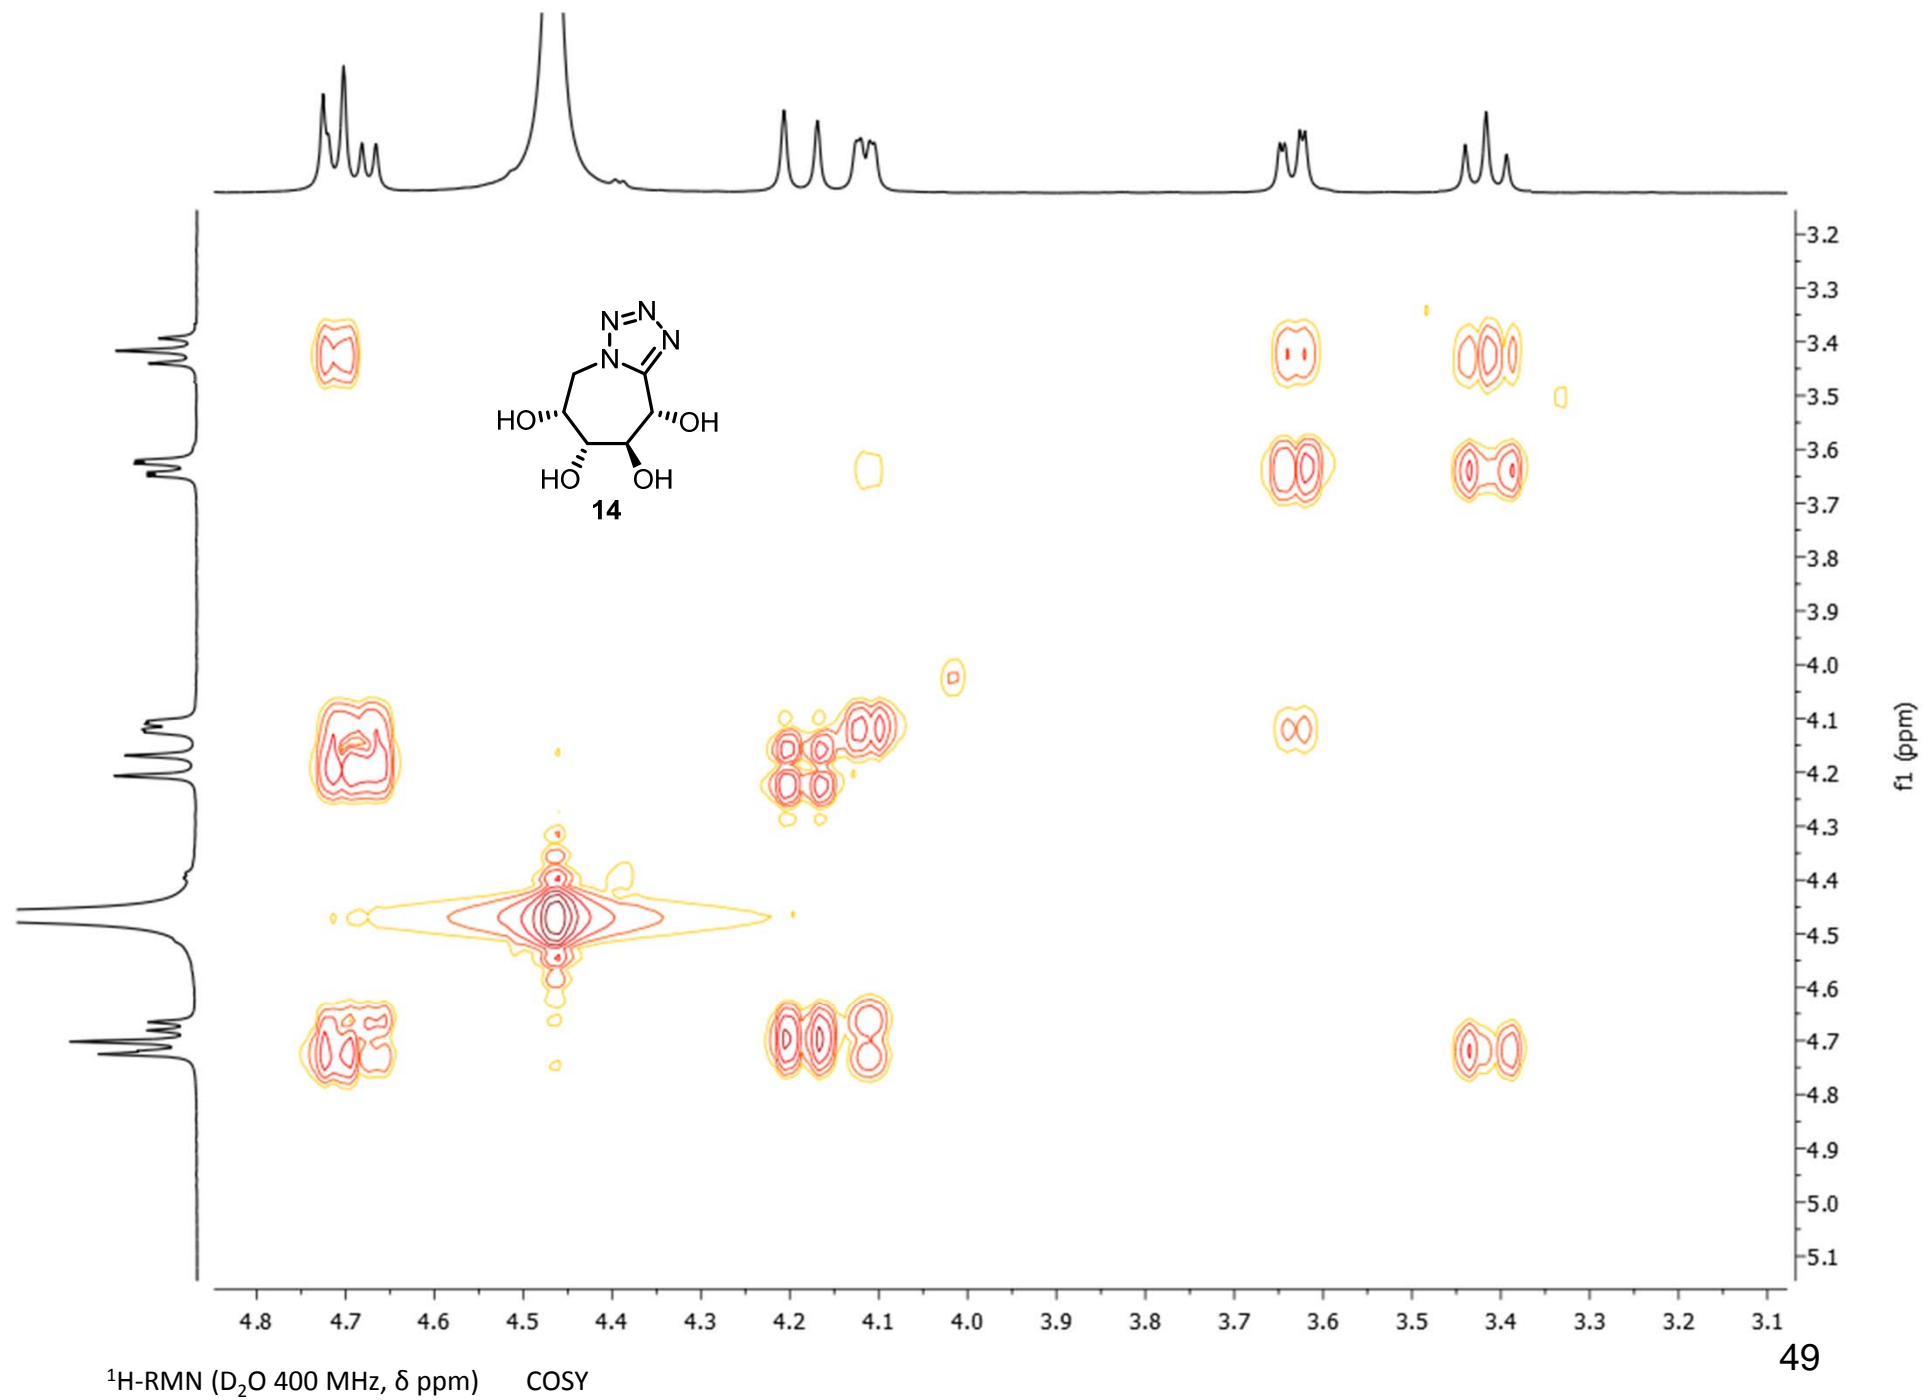

Supplement: c7ra10899k1.pdf [file c7ra10899k1.pdf]
